# Supplementary material for: Accountability of livestock multinationals for global environmental impacts
Source: Research Square preprint supplement (doi:10.21203/rs.3.rs-8924723/v1), 2026-02-23
Supplement: Supplementary file 1 [file 430d2ac38df59079e39dec12.xlsx]

## Sheet: Overview
Supplementary Tables: Accountability of livestock multinationals for global environmental impacts
Christina Drotenko
Institute of Environmental Sciences (CML), Leiden University, Leiden, The Netherlands
Oliver Taherzadeh
Institute of Environmental Sciences (CML), Leiden University, Leiden, The Netherlands
Laura Scherer
Institute of Environmental Sciences (CML), Leiden University, Leiden, The Netherlands
Anniek J. Kortleve
Institute of Environmental Sciences (CML), Leiden University, Leiden, The Netherlands
Rutger Hoekstra
Institute of Environmental Sciences (CML), Leiden University, Leiden, The Netherlands
Paul Behrens
Oxford Martin School, Oxford University, Oxford, United Kingdom
Institute of Environmental Sciences (CML), Leiden University, Leiden, The Netherlands
Tab Name	Description
Table 1	All TNC impacts relative to global impacts (combined blue & green water) across combined animal products
Table 2	Environmental impacts per company relative to other companies
Table 3	Environmental impacts across all companies, regions, land types, and animal products
Table 4	Distinction between blue and green water in results

## Sheet: Table 1
All TNC Impacts Relative to Global Impacts (Combined Blue & Green Water) Across Combined Animal Products
Combined blue and green water impacts
Impact type	TNC impacts	Global impacts	Relative percentage	Unit
Blue and green water	815034062	3.58308e+09	0.227468	1000 m³
Land use	500347	1.95953e+06	0.255341	kha
Nitrogen application	6727197	2.38403e+07	0.282178	t
See: 'Results_visualisations.xlsx' publicly available on our repository for detailed information on how these values were all calculated.

## Sheet: Table 2
Environmental impacts per company relative to other companies							Highlighted cells refer to the three companies mentioned in the manuscript with the highest relative impacts.
Company	Animal product	Impact type	Unit	Footprint amount	Impacts relative to animal product and env impact
ACOLID	Poultry Meat	Land use	(Mha)	1.287	0.0764343
Agropur	Milk - Excluding Butter	Land use	(Mha)	3.248	0.0412418
Amul	Milk - Excluding Butter	Land use	(Mha)	1.672	0.0212304
Arla	Milk - Excluding Butter	Land use	(Mha)	2.611	0.0331535
Aurora Alimentos	Pigmeat	Land use	(Mha)	0.813	0.0233876
Aurora Alimentos	Poultry Meat	Land use	(Mha)	0.337	0.0200143
BRF	Pigmeat	Land use	(Mha)	1.072	0.0308383
BRF	Poultry Meat	Land use	(Mha)	1.716	0.101912
Bigard	Bovine Meat	Land use	(Mha)	2.088	0.00564245
Bigard	Pigmeat	Land use	(Mha)	1.01	0.0290547
COFCO Group	Pigmeat	Land use	(Mha)	0.769	0.0221219
California Diaries	Milk - Excluding Butter	Land use	(Mha)	3.725	0.0472986
Cargill	Bovine Meat	Land use	(Mha)	52.556	0.142023
Cargill	Poultry Meat	Land use	(Mha)	1.084	0.0643782
Charoen Pokphand	Pigmeat	Land use	(Mha)	1.373	0.0394972
Charoen Pokphand	Poultry Meat	Land use	(Mha)	0.613	0.0364057
China Mengniu Dairy	Milk - Excluding Butter	Land use	(Mha)	7.814	0.0992191
Clemens Food Group	Pigmeat	Land use	(Mha)	0.415	0.0119383
Continental Grain Company	Poultry Meat	Land use	(Mha)	0.536	0.0318328
Cooperl Arc Atlantique	Pigmeat	Land use	(Mha)	0.519	0.0149301
DMK	Milk - Excluding Butter	Land use	(Mha)	1.064	0.0135103
Dairy Farmers of America	Milk - Excluding Butter	Land use	(Mha)	14.379	0.182579
Danish Crown	Bovine Meat	Land use	(Mha)	0.862	0.0023294
Danish Crown	Pigmeat	Land use	(Mha)	1.99	0.0572464
Danone-IFCN	Milk - Excluding Butter	Land use	(Mha)	6.131	0.077849
Fonterra	Milk - Excluding Butter	Land use	(Mha)	10.025	0.127294
FrieslandCampina	Milk - Excluding Butter	Land use	(Mha)	2.069	0.0262713
Fuijan Sunner Development	Poultry Meat	Land use	(Mha)	0.465	0.0276161
Glanbia	Milk - Excluding Butter	Land use	(Mha)	4.361	0.0553743
Grupo Jorges	Pigmeat	Land use	(Mha)	0.773	0.0222369
Grupo Vall	Pigmeat	Land use	(Mha)	1.027	0.0295438
Gruppo Cremonini	Bovine Meat	Land use	(Mha)	2.012	0.00543707
Gruppo Cremonini	Pigmeat	Land use	(Mha)	0.083	0.00238766
Industrias Bachoco	Poultry Meat	Land use	(Mha)	0.668	0.0396722
JBS	Bovine Meat	Land use	(Mha)	164.917	0.445659
JBS	Pigmeat	Land use	(Mha)	5.14	0.147863
JBS	Poultry Meat	Land use	(Mha)	3.683	0.218731
Japfa	Poultry Meat	Land use	(Mha)	0.67	0.0397909
Koch Foods	Poultry Meat	Land use	(Mha)	0.67	0.0397909
Lactalis	Milk - Excluding Butter	Land use	(Mha)	4.37	0.0554885
MHP	Poultry Meat	Land use	(Mha)	0.53	0.0314764
Marfrig	Bovine Meat	Land use	(Mha)	57.307	0.154862
Minerva	Bovine Meat	Land use	(Mha)	30.137	0.0814399
Muyuan Foodstuff	Pigmeat	Land use	(Mha)	1.966	0.056556
Müller	Milk - Excluding Butter	Land use	(Mha)	1.296	0.0164561
NH Foods	Bovine Meat	Land use	(Mha)	5.165	0.0139575
Nestlé	Milk - Excluding Butter	Land use	(Mha)	2.611	0.0331535
New Hope Group	Pigmeat	Land use	(Mha)	0.584	0.0168
New Hope Group	Poultry Meat	Land use	(Mha)	0.451	0.0267847
Perdue Farms	Poultry Meat	Land use	(Mha)	0.615	0.0365245
Saputo	Milk - Excluding Butter	Land use	(Mha)	5.323	0.0675894
Seaboard	Pigmeat	Land use	(Mha)	0.737	0.0212013
Teys	Bovine Meat	Land use	(Mha)	11.527	0.0311497
Triumph Foods	Pigmeat	Land use	(Mha)	0.638	0.0183534
Tyson	Bovine Meat	Land use	(Mha)	41.703	0.112695
Tyson	Pigmeat	Land use	(Mha)	2.539	0.0730395
Tyson	Poultry Meat	Land use	(Mha)	1.884	0.11189
Tönnies Group	Bovine Meat	Land use	(Mha)	0.389	0.0010512
Tönnies Group	Pigmeat	Land use	(Mha)	2.15	0.0618491
Vion Food Group	Bovine Meat	Land use	(Mha)	0.981	0.00265098
Vion Food Group	Pigmeat	Land use	(Mha)	1.846	0.053104
WH Group	Pigmeat	Land use	(Mha)	6.703	0.192825
WH Group	Poultry Meat	Land use	(Mha)	0.266	0.0157976
Wellhope Agritech	Poultry Meat	Land use	(Mha)	0.552	0.032783
Wen's Food Group	Pigmeat	Land use	(Mha)	0.566	0.0162821
Wen's Food Group	Poultry Meat	Land use	(Mha)	0.811	0.0481649
Westfleisch	Bovine Meat	Land use	(Mha)	0.408	0.00110255
Westfleisch	Pigmeat	Land use	(Mha)	0.797	0.0229273
Yili	Milk - Excluding Butter	Land use	(Mha)	8.056	0.102292
Zhengbang Group	Pigmeat	Land use	(Mha)	1.252	0.0360163
ACOLID	Poultry Meat	Blue and green water	(km³)	7.66333	0.0783505
Agropur	Milk - Excluding Butter	Blue and green water	(km³)	5.37349	0.0337894
Amul	Milk - Excluding Butter	Blue and green water	(km³)	12.1395	0.0763351
Arla	Milk - Excluding Butter	Blue and green water	(km³)	9.38683	0.059026
Aurora Alimentos	Pigmeat	Blue and green water	(km³)	5.94718	0.0321937
Aurora Alimentos	Poultry Meat	Blue and green water	(km³)	2.48484	0.0254052
BRF	Pigmeat	Blue and green water	(km³)	7.85832	0.0425391
BRF	Poultry Meat	Blue and green water	(km³)	12.4808	0.127604
Bigard	Bovine Meat	Blue and green water	(km³)	4.77572	0.0127844
Bigard	Pigmeat	Blue and green water	(km³)	5.42463	0.029365
COFCO Group	Pigmeat	Blue and green water	(km³)	4.58707	0.024831
California Diaries	Milk - Excluding Butter	Blue and green water	(km³)	6.18129	0.038869
Cargill	Bovine Meat	Blue and green water	(km³)	46.1116	0.123439
Cargill	Poultry Meat	Blue and green water	(km³)	6.01743	0.0615226
Charoen Pokphand	Pigmeat	Blue and green water	(km³)	6.4251	0.0347808
Charoen Pokphand	Poultry Meat	Blue and green water	(km³)	3.60782	0.0368866
China Mengniu Dairy	Milk - Excluding Butter	Blue and green water	(km³)	14.277	0.0897763
Clemens Food Group	Pigmeat	Blue and green water	(km³)	1.90354	0.0103043
Continental Grain Company	Poultry Meat	Blue and green water	(km³)	2.4324	0.024869
Cooperl Arc Atlantique	Pigmeat	Blue and green water	(km³)	2.78397	0.0150704
DMK	Milk - Excluding Butter	Blue and green water	(km³)	3.82064	0.0240248
Dairy Farmers of America	Milk - Excluding Butter	Blue and green water	(km³)	23.8617	0.150046
Danish Crown	Bovine Meat	Blue and green water	(km³)	1.97891	0.00529748
Danish Crown	Pigmeat	Blue and green water	(km³)	10.5801	0.0572728
Danone-IFCN	Milk - Excluding Butter	Blue and green water	(km³)	8.27661	0.0520447
Fonterra	Milk - Excluding Butter	Blue and green water	(km³)	7.74239	0.0486855
FrieslandCampina	Milk - Excluding Butter	Blue and green water	(km³)	7.43233	0.0467357
Fuijan Sunner Development	Poultry Meat	Blue and green water	(km³)	2.93364	0.0299938
Glanbia	Milk - Excluding Butter	Blue and green water	(km³)	7.23011	0.0454641
Grupo Jorges	Pigmeat	Blue and green water	(km³)	4.14384	0.0224317
Grupo Vall	Pigmeat	Blue and green water	(km³)	5.50623	0.0298067
Gruppo Cremonini	Bovine Meat	Blue and green water	(km³)	4.61906	0.0123651
Gruppo Cremonini	Pigmeat	Blue and green water	(km³)	0.457844	0.00247843
Industrias Bachoco	Poultry Meat	Blue and green water	(km³)	4.52272	0.0462406
JBS	Bovine Meat	Blue and green water	(km³)	160.432	0.429472
JBS	Pigmeat	Blue and green water	(km³)	25.6752	0.138986
JBS	Poultry Meat	Blue and green water	(km³)	21.1122	0.215852
Japfa	Poultry Meat	Blue and green water	(km³)	4.22887	0.0432363
Koch Foods	Poultry Meat	Blue and green water	(km³)	3.03373	0.0310171
Lactalis	Milk - Excluding Butter	Blue and green water	(km³)	15.7112	0.0987947
MHP	Poultry Meat	Blue and green water	(km³)	2.76583	0.028278
Marfrig	Bovine Meat	Blue and green water	(km³)	69.1447	0.185098
Minerva	Bovine Meat	Blue and green water	(km³)	39.3186	0.105255
Muyuan Foodstuff	Pigmeat	Blue and green water	(km³)	11.6806	0.0632302
Müller	Milk - Excluding Butter	Blue and green water	(km³)	4.65187	0.0292518
NH Foods	Bovine Meat	Blue and green water	(km³)	1.54355	0.00413203
Nestlé	Milk - Excluding Butter	Blue and green water	(km³)	9.38683	0.059026
New Hope Group	Pigmeat	Blue and green water	(km³)	3.49189	0.0189025
New Hope Group	Poultry Meat	Blue and green water	(km³)	2.83211	0.0289557
Perdue Farms	Poultry Meat	Blue and green water	(km³)	2.786	0.0284843
Saputo	Milk - Excluding Butter	Blue and green water	(km³)	8.82572	0.0554976
Seaboard	Pigmeat	Blue and green water	(km³)	3.38068	0.0183005
Teys	Bovine Meat	Blue and green water	(km³)	3.44698	0.00922744
Triumph Foods	Pigmeat	Blue and green water	(km³)	2.93003	0.015861
Tyson	Bovine Meat	Blue and green water	(km³)	38.0882	0.101961
Tyson	Pigmeat	Blue and green water	(km³)	11.5443	0.0624925
Tyson	Poultry Meat	Blue and green water	(km³)	8.75243	0.0894855
Tönnies Group	Bovine Meat	Blue and green water	(km³)	0.901005	0.00241196
Tönnies Group	Pigmeat	Blue and green water	(km³)	11.5255	0.0623907
Vion Food Group	Bovine Meat	Blue and green water	(km³)	2.25428	0.00603462
Vion Food Group	Pigmeat	Blue and green water	(km³)	9.85663	0.0533566
WH Group	Pigmeat	Blue and green water	(km³)	33.9265	0.183653
WH Group	Poultry Meat	Blue and green water	(km³)	1.56333	0.0159836
Wellhope Agritech	Poultry Meat	Blue and green water	(km³)	3.48726	0.035654
Wen's Food Group	Pigmeat	Blue and green water	(km³)	3.38499	0.0183239
Wen's Food Group	Poultry Meat	Blue and green water	(km³)	5.10368	0.0521804
Westfleisch	Bovine Meat	Blue and green water	(km³)	0.942036	0.0025218
Westfleisch	Pigmeat	Blue and green water	(km³)	4.27001	0.0231147
Yili	Milk - Excluding Butter	Blue and green water	(km³)	14.7313	0.0926329
Zhengbang Group	Pigmeat	Blue and green water	(km³)	7.44735	0.0403144
ACOLID	Poultry Meat	Nitrogen application	(kt)	64.899	0.0696383
Agropur	Milk - Excluding Butter	Nitrogen application	(kt)	52.448	0.0298528
Amul	Milk - Excluding Butter	Nitrogen application	(kt)	68.541	0.0390127
Arla	Milk - Excluding Butter	Nitrogen application	(kt)	148.739	0.0846604
Aurora Alimentos	Pigmeat	Nitrogen application	(kt)	32.669	0.0144237
Aurora Alimentos	Poultry Meat	Nitrogen application	(kt)	12.729	0.0136585
BRF	Pigmeat	Nitrogen application	(kt)	43.226	0.0190847
BRF	Poultry Meat	Nitrogen application	(kt)	63.802	0.0684612
Bigard	Bovine Meat	Nitrogen application	(kt)	96.624	0.0544695
Bigard	Pigmeat	Nitrogen application	(kt)	82.134	0.0362631
COFCO Group	Pigmeat	Nitrogen application	(kt)	59.785	0.0263957
California Diaries	Milk - Excluding Butter	Nitrogen application	(kt)	60.301	0.0343226
Cargill	Bovine Meat	Nitrogen application	(kt)	350.677	0.197686
Cargill	Poultry Meat	Nitrogen application	(kt)	65.565	0.0703529
Charoen Pokphand	Pigmeat	Nitrogen application	(kt)	45.887	0.0202596
Charoen Pokphand	Poultry Meat	Nitrogen application	(kt)	28.766	0.0308667
China Mengniu Dairy	Milk - Excluding Butter	Nitrogen application	(kt)	145.666	0.0829113
Clemens Food Group	Pigmeat	Nitrogen application	(kt)	23.602	0.0104205
Continental Grain Company	Poultry Meat	Nitrogen application	(kt)	35.818	0.0384336
Cooperl Arc Atlantique	Pigmeat	Nitrogen application	(kt)	42.133	0.0186022
DMK	Milk - Excluding Butter	Nitrogen application	(kt)	60.502	0.034437
Dairy Farmers of America	Milk - Excluding Butter	Nitrogen application	(kt)	232.245	0.132191
Danish Crown	Bovine Meat	Nitrogen application	(kt)	39.974	0.0225344
Danish Crown	Pigmeat	Nitrogen application	(kt)	154.48	0.0682046
Danone-IFCN	Milk - Excluding Butter	Nitrogen application	(kt)	46.498	0.0264661
Fonterra	Milk - Excluding Butter	Nitrogen application	(kt)	45.323	0.0257973
FrieslandCampina	Milk - Excluding Butter	Nitrogen application	(kt)	117.877	0.0670941
Fuijan Sunner Development	Poultry Meat	Nitrogen application	(kt)	27.227	0.0292153
Glanbia	Milk - Excluding Butter	Nitrogen application	(kt)	70.478	0.0401152
Grupo Jorges	Pigmeat	Nitrogen application	(kt)	62.706	0.0276854
Grupo Vall	Pigmeat	Nitrogen application	(kt)	83.384	0.0368149
Gruppo Cremonini	Bovine Meat	Nitrogen application	(kt)	93.167	0.0525207
Gruppo Cremonini	Pigmeat	Nitrogen application	(kt)	6.933	0.00306099
Industrias Bachoco	Poultry Meat	Nitrogen application	(kt)	29.022	0.0311414
JBS	Bovine Meat	Nitrogen application	(kt)	551.277	0.31077
JBS	Pigmeat	Nitrogen application	(kt)	266.693	0.117748
JBS	Poultry Meat	Nitrogen application	(kt)	208.759	0.224004
Japfa	Poultry Meat	Nitrogen application	(kt)	39.325	0.0421967
Koch Foods	Poultry Meat	Nitrogen application	(kt)	44.8	0.0480716
Lactalis	Milk - Excluding Butter	Nitrogen application	(kt)	248.659	0.141534
MHP	Poultry Meat	Nitrogen application	(kt)	24.878	0.0266947
Marfrig	Bovine Meat	Nitrogen application	(kt)	217.423	0.122567
Minerva	Bovine Meat	Nitrogen application	(kt)	35.102	0.0197879
Muyuan Foodstuff	Pigmeat	Nitrogen application	(kt)	152.906	0.0675097
Müller	Milk - Excluding Butter	Nitrogen application	(kt)	73.817	0.0420157
NH Foods	Bovine Meat	Nitrogen application	(kt)	3.954	0.00222898
Nestlé	Milk - Excluding Butter	Nitrogen application	(kt)	148.739	0.0846604
New Hope Group	Pigmeat	Nitrogen application	(kt)	45.541	0.0201068
New Hope Group	Poultry Meat	Nitrogen application	(kt)	26.387	0.0283139
Perdue Farms	Poultry Meat	Nitrogen application	(kt)	41.126	0.0441293
Saputo	Milk - Excluding Butter	Nitrogen application	(kt)	86.071	0.0489905
Seaboard	Pigmeat	Nitrogen application	(kt)	41.775	0.0184441
Teys	Bovine Meat	Nitrogen application	(kt)	8.819	0.00497151
Triumph Foods	Pigmeat	Nitrogen application	(kt)	36.228	0.0159951
Tyson	Bovine Meat	Nitrogen application	(kt)	294.154	0.165822
Tyson	Pigmeat	Nitrogen application	(kt)	143.679	0.0634358
Tyson	Poultry Meat	Nitrogen application	(kt)	124.638	0.13374
Tönnies Group	Bovine Meat	Nitrogen application	(kt)	18.203	0.0102615
Tönnies Group	Pigmeat	Nitrogen application	(kt)	174.338	0.0769721
Vion Food Group	Bovine Meat	Nitrogen application	(kt)	45.533	0.0256682
Vion Food Group	Pigmeat	Nitrogen application	(kt)	149.182	0.0658655
WH Group	Pigmeat	Nitrogen application	(kt)	411.679	0.181761
WH Group	Poultry Meat	Nitrogen application	(kt)	14.328	0.0153743
Wellhope Agritech	Poultry Meat	Nitrogen application	(kt)	32.463	0.0348336
Wen's Food Group	Pigmeat	Nitrogen application	(kt)	44.142	0.0194892
Wen's Food Group	Poultry Meat	Nitrogen application	(kt)	47.412	0.0508743
Westfleisch	Bovine Meat	Nitrogen application	(kt)	19.002	0.0107119
Westfleisch	Pigmeat	Nitrogen application	(kt)	64.701	0.0285662
Yili	Milk - Excluding Butter	Nitrogen application	(kt)	150.986	0.0859394
Zhengbang Group	Pigmeat	Nitrogen application	(kt)	97.147	0.0428915

## Sheet: Table 3
Environmental impacts across all companies, regions, land types, and animal products
Company	Land type	Region	Impact amount	Animal product	Impact type	Unit
Bigard	Grazing	East Asia and Southeast Asia	0	Bovine Meat	Land use	(kha)
Bigard	Grazing	Eastern Europe	18	Bovine Meat	Land use	(kha)
Bigard	Grazing	Latin America and the Caribbean	0	Bovine Meat	Land use	(kha)
Bigard	Grazing	Near East and North Africa	0	Bovine Meat	Land use	(kha)
Bigard	Grazing	North America	0	Bovine Meat	Land use	(kha)
Bigard	Grazing	Oceania	0	Bovine Meat	Land use	(kha)
Bigard	Grazing	RoW	0	Bovine Meat	Land use	(kha)
Bigard	Grazing	Russian Federation	0	Bovine Meat	Land use	(kha)
Bigard	Grazing	South Asia	0	Bovine Meat	Land use	(kha)
Bigard	Grazing	Sub-Saharan Africa	0	Bovine Meat	Land use	(kha)
Bigard	Grazing	Western Europe	1605	Bovine Meat	Land use	(kha)
Bigard	Croplands	East Asia and Southeast Asia	3	Bovine Meat	Land use	(kha)
Bigard	Croplands	Eastern Europe	48	Bovine Meat	Land use	(kha)
Bigard	Croplands	Latin America and the Caribbean	36	Bovine Meat	Land use	(kha)
Bigard	Croplands	Near East and North Africa	3	Bovine Meat	Land use	(kha)
Bigard	Croplands	North America	18	Bovine Meat	Land use	(kha)
Bigard	Croplands	Oceania	3	Bovine Meat	Land use	(kha)
Bigard	Croplands	RoW	0	Bovine Meat	Land use	(kha)
Bigard	Croplands	Russian Federation	7	Bovine Meat	Land use	(kha)
Bigard	Croplands	South Asia	3	Bovine Meat	Land use	(kha)
Bigard	Croplands	Sub-Saharan Africa	1	Bovine Meat	Land use	(kha)
Bigard	Croplands	Western Europe	338	Bovine Meat	Land use	(kha)
Cargill	Grazing	East Asia and Southeast Asia	2	Bovine Meat	Land use	(kha)
Cargill	Grazing	Eastern Europe	0	Bovine Meat	Land use	(kha)
Cargill	Grazing	Latin America and the Caribbean	892	Bovine Meat	Land use	(kha)
Cargill	Grazing	Near East and North Africa	0	Bovine Meat	Land use	(kha)
Cargill	Grazing	North America	37025	Bovine Meat	Land use	(kha)
Cargill	Grazing	Oceania	11407	Bovine Meat	Land use	(kha)
Cargill	Grazing	RoW	0	Bovine Meat	Land use	(kha)
Cargill	Grazing	Russian Federation	0	Bovine Meat	Land use	(kha)
Cargill	Grazing	South Asia	0	Bovine Meat	Land use	(kha)
Cargill	Grazing	Sub-Saharan Africa	0	Bovine Meat	Land use	(kha)
Cargill	Grazing	Western Europe	0	Bovine Meat	Land use	(kha)
Cargill	Croplands	East Asia and Southeast Asia	4	Bovine Meat	Land use	(kha)
Cargill	Croplands	Eastern Europe	2	Bovine Meat	Land use	(kha)
Cargill	Croplands	Latin America and the Caribbean	32	Bovine Meat	Land use	(kha)
Cargill	Croplands	Near East and North Africa	0	Bovine Meat	Land use	(kha)
Cargill	Croplands	North America	3103	Bovine Meat	Land use	(kha)
Cargill	Croplands	Oceania	115	Bovine Meat	Land use	(kha)
Cargill	Croplands	RoW	0	Bovine Meat	Land use	(kha)
Cargill	Croplands	Russian Federation	0	Bovine Meat	Land use	(kha)
Cargill	Croplands	South Asia	7	Bovine Meat	Land use	(kha)
Cargill	Croplands	Sub-Saharan Africa	0	Bovine Meat	Land use	(kha)
Cargill	Croplands	Western Europe	2	Bovine Meat	Land use	(kha)
Danish Crown	Grazing	East Asia and Southeast Asia	0	Bovine Meat	Land use	(kha)
Danish Crown	Grazing	Eastern Europe	7	Bovine Meat	Land use	(kha)
Danish Crown	Grazing	Latin America and the Caribbean	0	Bovine Meat	Land use	(kha)
Danish Crown	Grazing	Near East and North Africa	0	Bovine Meat	Land use	(kha)
Danish Crown	Grazing	North America	0	Bovine Meat	Land use	(kha)
Danish Crown	Grazing	Oceania	0	Bovine Meat	Land use	(kha)
Danish Crown	Grazing	RoW	0	Bovine Meat	Land use	(kha)
Danish Crown	Grazing	Russian Federation	0	Bovine Meat	Land use	(kha)
Danish Crown	Grazing	South Asia	0	Bovine Meat	Land use	(kha)
Danish Crown	Grazing	Sub-Saharan Africa	0	Bovine Meat	Land use	(kha)
Danish Crown	Grazing	Western Europe	665	Bovine Meat	Land use	(kha)
Danish Crown	Croplands	East Asia and Southeast Asia	1	Bovine Meat	Land use	(kha)
Danish Crown	Croplands	Eastern Europe	20	Bovine Meat	Land use	(kha)
Danish Crown	Croplands	Latin America and the Caribbean	15	Bovine Meat	Land use	(kha)
Danish Crown	Croplands	Near East and North Africa	1	Bovine Meat	Land use	(kha)
Danish Crown	Croplands	North America	8	Bovine Meat	Land use	(kha)
Danish Crown	Croplands	Oceania	1	Bovine Meat	Land use	(kha)
Danish Crown	Croplands	RoW	0	Bovine Meat	Land use	(kha)
Danish Crown	Croplands	Russian Federation	3	Bovine Meat	Land use	(kha)
Danish Crown	Croplands	South Asia	1	Bovine Meat	Land use	(kha)
Danish Crown	Croplands	Sub-Saharan Africa	0	Bovine Meat	Land use	(kha)
Danish Crown	Croplands	Western Europe	140	Bovine Meat	Land use	(kha)
Gruppo Cremonini	Grazing	East Asia and Southeast Asia	0	Bovine Meat	Land use	(kha)
Gruppo Cremonini	Grazing	Eastern Europe	17	Bovine Meat	Land use	(kha)
Gruppo Cremonini	Grazing	Latin America and the Caribbean	0	Bovine Meat	Land use	(kha)
Gruppo Cremonini	Grazing	Near East and North Africa	0	Bovine Meat	Land use	(kha)
Gruppo Cremonini	Grazing	North America	0	Bovine Meat	Land use	(kha)
Gruppo Cremonini	Grazing	Oceania	0	Bovine Meat	Land use	(kha)
Gruppo Cremonini	Grazing	RoW	0	Bovine Meat	Land use	(kha)
Gruppo Cremonini	Grazing	Russian Federation	0	Bovine Meat	Land use	(kha)
Gruppo Cremonini	Grazing	South Asia	0	Bovine Meat	Land use	(kha)
Gruppo Cremonini	Grazing	Sub-Saharan Africa	0	Bovine Meat	Land use	(kha)
Gruppo Cremonini	Grazing	Western Europe	1549	Bovine Meat	Land use	(kha)
Gruppo Cremonini	Croplands	East Asia and Southeast Asia	3	Bovine Meat	Land use	(kha)
Gruppo Cremonini	Croplands	Eastern Europe	47	Bovine Meat	Land use	(kha)
Gruppo Cremonini	Croplands	Latin America and the Caribbean	34	Bovine Meat	Land use	(kha)
Gruppo Cremonini	Croplands	Near East and North Africa	3	Bovine Meat	Land use	(kha)
Gruppo Cremonini	Croplands	North America	18	Bovine Meat	Land use	(kha)
Gruppo Cremonini	Croplands	Oceania	3	Bovine Meat	Land use	(kha)
Gruppo Cremonini	Croplands	RoW	0	Bovine Meat	Land use	(kha)
Gruppo Cremonini	Croplands	Russian Federation	7	Bovine Meat	Land use	(kha)
Gruppo Cremonini	Croplands	South Asia	3	Bovine Meat	Land use	(kha)
Gruppo Cremonini	Croplands	Sub-Saharan Africa	1	Bovine Meat	Land use	(kha)
Gruppo Cremonini	Croplands	Western Europe	326	Bovine Meat	Land use	(kha)
JBS	Grazing	East Asia and Southeast Asia	3	Bovine Meat	Land use	(kha)
JBS	Grazing	Eastern Europe	0	Bovine Meat	Land use	(kha)
JBS	Grazing	Latin America and the Caribbean	71166	Bovine Meat	Land use	(kha)
JBS	Grazing	Near East and North Africa	0	Bovine Meat	Land use	(kha)
JBS	Grazing	North America	47403	Bovine Meat	Land use	(kha)
JBS	Grazing	Oceania	40074	Bovine Meat	Land use	(kha)
JBS	Grazing	RoW	0	Bovine Meat	Land use	(kha)
JBS	Grazing	Russian Federation	0	Bovine Meat	Land use	(kha)
JBS	Grazing	South Asia	0	Bovine Meat	Land use	(kha)
JBS	Grazing	Sub-Saharan Africa	1	Bovine Meat	Land use	(kha)
JBS	Grazing	Western Europe	2	Bovine Meat	Land use	(kha)
JBS	Croplands	East Asia and Southeast Asia	13	Bovine Meat	Land use	(kha)
JBS	Croplands	Eastern Europe	4	Bovine Meat	Land use	(kha)
JBS	Croplands	Latin America and the Caribbean	1684	Bovine Meat	Land use	(kha)
JBS	Croplands	Near East and North Africa	3	Bovine Meat	Land use	(kha)
JBS	Croplands	North America	4076	Bovine Meat	Land use	(kha)
JBS	Croplands	Oceania	404	Bovine Meat	Land use	(kha)
JBS	Croplands	RoW	0	Bovine Meat	Land use	(kha)
JBS	Croplands	Russian Federation	3	Bovine Meat	Land use	(kha)
JBS	Croplands	South Asia	11	Bovine Meat	Land use	(kha)
JBS	Croplands	Sub-Saharan Africa	8	Bovine Meat	Land use	(kha)
JBS	Croplands	Western Europe	5	Bovine Meat	Land use	(kha)
Marfrig	Grazing	East Asia and Southeast Asia	1	Bovine Meat	Land use	(kha)
Marfrig	Grazing	Eastern Europe	0	Bovine Meat	Land use	(kha)
Marfrig	Grazing	Latin America and the Caribbean	35737	Bovine Meat	Land use	(kha)
Marfrig	Grazing	Near East and North Africa	0	Bovine Meat	Land use	(kha)
Marfrig	Grazing	North America	19051	Bovine Meat	Land use	(kha)
Marfrig	Grazing	Oceania	11	Bovine Meat	Land use	(kha)
Marfrig	Grazing	RoW	0	Bovine Meat	Land use	(kha)
Marfrig	Grazing	Russian Federation	0	Bovine Meat	Land use	(kha)
Marfrig	Grazing	South Asia	0	Bovine Meat	Land use	(kha)
Marfrig	Grazing	Sub-Saharan Africa	0	Bovine Meat	Land use	(kha)
Marfrig	Grazing	Western Europe	0	Bovine Meat	Land use	(kha)
Marfrig	Croplands	East Asia and Southeast Asia	1	Bovine Meat	Land use	(kha)
Marfrig	Croplands	Eastern Europe	1	Bovine Meat	Land use	(kha)
Marfrig	Croplands	Latin America and the Caribbean	831	Bovine Meat	Land use	(kha)
Marfrig	Croplands	Near East and North Africa	1	Bovine Meat	Land use	(kha)
Marfrig	Croplands	North America	1647	Bovine Meat	Land use	(kha)
Marfrig	Croplands	Oceania	0	Bovine Meat	Land use	(kha)
Marfrig	Croplands	RoW	0	Bovine Meat	Land use	(kha)
Marfrig	Croplands	Russian Federation	1	Bovine Meat	Land use	(kha)
Marfrig	Croplands	South Asia	4	Bovine Meat	Land use	(kha)
Marfrig	Croplands	Sub-Saharan Africa	4	Bovine Meat	Land use	(kha)
Marfrig	Croplands	Western Europe	2	Bovine Meat	Land use	(kha)
Minerva	Grazing	East Asia and Southeast Asia	0	Bovine Meat	Land use	(kha)
Minerva	Grazing	Eastern Europe	0	Bovine Meat	Land use	(kha)
Minerva	Grazing	Latin America and the Caribbean	29425	Bovine Meat	Land use	(kha)
Minerva	Grazing	Near East and North Africa	0	Bovine Meat	Land use	(kha)
Minerva	Grazing	North America	8	Bovine Meat	Land use	(kha)
Minerva	Grazing	Oceania	0	Bovine Meat	Land use	(kha)
Minerva	Grazing	RoW	0	Bovine Meat	Land use	(kha)
Minerva	Grazing	Russian Federation	0	Bovine Meat	Land use	(kha)
Minerva	Grazing	South Asia	0	Bovine Meat	Land use	(kha)
Minerva	Grazing	Sub-Saharan Africa	0	Bovine Meat	Land use	(kha)
Minerva	Grazing	Western Europe	0	Bovine Meat	Land use	(kha)
Minerva	Croplands	East Asia and Southeast Asia	0	Bovine Meat	Land use	(kha)
Minerva	Croplands	Eastern Europe	0	Bovine Meat	Land use	(kha)
Minerva	Croplands	Latin America and the Caribbean	683	Bovine Meat	Land use	(kha)
Minerva	Croplands	Near East and North Africa	0	Bovine Meat	Land use	(kha)
Minerva	Croplands	North America	43	Bovine Meat	Land use	(kha)
Minerva	Croplands	Oceania	0	Bovine Meat	Land use	(kha)
Minerva	Croplands	RoW	0	Bovine Meat	Land use	(kha)
Minerva	Croplands	Russian Federation	0	Bovine Meat	Land use	(kha)
Minerva	Croplands	South Asia	0	Bovine Meat	Land use	(kha)
Minerva	Croplands	Sub-Saharan Africa	3	Bovine Meat	Land use	(kha)
Minerva	Croplands	Western Europe	0	Bovine Meat	Land use	(kha)
NH Foods	Grazing	East Asia and Southeast Asia	0	Bovine Meat	Land use	(kha)
NH Foods	Grazing	Eastern Europe	0	Bovine Meat	Land use	(kha)
NH Foods	Grazing	Latin America and the Caribbean	0	Bovine Meat	Land use	(kha)
NH Foods	Grazing	Near East and North Africa	0	Bovine Meat	Land use	(kha)
NH Foods	Grazing	North America	0	Bovine Meat	Land use	(kha)
NH Foods	Grazing	Oceania	5114	Bovine Meat	Land use	(kha)
NH Foods	Grazing	RoW	0	Bovine Meat	Land use	(kha)
NH Foods	Grazing	Russian Federation	0	Bovine Meat	Land use	(kha)
NH Foods	Grazing	South Asia	0	Bovine Meat	Land use	(kha)
NH Foods	Grazing	Sub-Saharan Africa	0	Bovine Meat	Land use	(kha)
NH Foods	Grazing	Western Europe	0	Bovine Meat	Land use	(kha)
NH Foods	Croplands	East Asia and Southeast Asia	1	Bovine Meat	Land use	(kha)
NH Foods	Croplands	Eastern Europe	0	Bovine Meat	Land use	(kha)
NH Foods	Croplands	Latin America and the Caribbean	3	Bovine Meat	Land use	(kha)
NH Foods	Croplands	Near East and North Africa	0	Bovine Meat	Land use	(kha)
NH Foods	Croplands	North America	0	Bovine Meat	Land use	(kha)
NH Foods	Croplands	Oceania	51	Bovine Meat	Land use	(kha)
NH Foods	Croplands	RoW	0	Bovine Meat	Land use	(kha)
NH Foods	Croplands	Russian Federation	0	Bovine Meat	Land use	(kha)
NH Foods	Croplands	South Asia	0	Bovine Meat	Land use	(kha)
NH Foods	Croplands	Sub-Saharan Africa	0	Bovine Meat	Land use	(kha)
NH Foods	Croplands	Western Europe	0	Bovine Meat	Land use	(kha)
Teys	Grazing	East Asia and Southeast Asia	0	Bovine Meat	Land use	(kha)
Teys	Grazing	Eastern Europe	0	Bovine Meat	Land use	(kha)
Teys	Grazing	Latin America and the Caribbean	0	Bovine Meat	Land use	(kha)
Teys	Grazing	Near East and North Africa	0	Bovine Meat	Land use	(kha)
Teys	Grazing	North America	0	Bovine Meat	Land use	(kha)
Teys	Grazing	Oceania	11387	Bovine Meat	Land use	(kha)
Teys	Grazing	RoW	0	Bovine Meat	Land use	(kha)
Teys	Grazing	Russian Federation	0	Bovine Meat	Land use	(kha)
Teys	Grazing	South Asia	0	Bovine Meat	Land use	(kha)
Teys	Grazing	Sub-Saharan Africa	0	Bovine Meat	Land use	(kha)
Teys	Grazing	Western Europe	0	Bovine Meat	Land use	(kha)
Teys	Croplands	East Asia and Southeast Asia	3	Bovine Meat	Land use	(kha)
Teys	Croplands	Eastern Europe	0	Bovine Meat	Land use	(kha)
Teys	Croplands	Latin America and the Caribbean	8	Bovine Meat	Land use	(kha)
Teys	Croplands	Near East and North Africa	0	Bovine Meat	Land use	(kha)
Teys	Croplands	North America	1	Bovine Meat	Land use	(kha)
Teys	Croplands	Oceania	115	Bovine Meat	Land use	(kha)
Teys	Croplands	RoW	0	Bovine Meat	Land use	(kha)
Teys	Croplands	Russian Federation	0	Bovine Meat	Land use	(kha)
Teys	Croplands	South Asia	0	Bovine Meat	Land use	(kha)
Teys	Croplands	Sub-Saharan Africa	0	Bovine Meat	Land use	(kha)
Teys	Croplands	Western Europe	0	Bovine Meat	Land use	(kha)
Tönnies Group	Grazing	East Asia and Southeast Asia	0	Bovine Meat	Land use	(kha)
Tönnies Group	Grazing	Eastern Europe	3	Bovine Meat	Land use	(kha)
Tönnies Group	Grazing	Latin America and the Caribbean	0	Bovine Meat	Land use	(kha)
Tönnies Group	Grazing	Near East and North Africa	0	Bovine Meat	Land use	(kha)
Tönnies Group	Grazing	North America	0	Bovine Meat	Land use	(kha)
Tönnies Group	Grazing	Oceania	0	Bovine Meat	Land use	(kha)
Tönnies Group	Grazing	RoW	0	Bovine Meat	Land use	(kha)
Tönnies Group	Grazing	Russian Federation	0	Bovine Meat	Land use	(kha)
Tönnies Group	Grazing	South Asia	0	Bovine Meat	Land use	(kha)
Tönnies Group	Grazing	Sub-Saharan Africa	0	Bovine Meat	Land use	(kha)
Tönnies Group	Grazing	Western Europe	302	Bovine Meat	Land use	(kha)
Tönnies Group	Croplands	East Asia and Southeast Asia	0	Bovine Meat	Land use	(kha)
Tönnies Group	Croplands	Eastern Europe	9	Bovine Meat	Land use	(kha)
Tönnies Group	Croplands	Latin America and the Caribbean	7	Bovine Meat	Land use	(kha)
Tönnies Group	Croplands	Near East and North Africa	0	Bovine Meat	Land use	(kha)
Tönnies Group	Croplands	North America	3	Bovine Meat	Land use	(kha)
Tönnies Group	Croplands	Oceania	0	Bovine Meat	Land use	(kha)
Tönnies Group	Croplands	RoW	0	Bovine Meat	Land use	(kha)
Tönnies Group	Croplands	Russian Federation	1	Bovine Meat	Land use	(kha)
Tönnies Group	Croplands	South Asia	0	Bovine Meat	Land use	(kha)
Tönnies Group	Croplands	Sub-Saharan Africa	0	Bovine Meat	Land use	(kha)
Tönnies Group	Croplands	Western Europe	64	Bovine Meat	Land use	(kha)
Tyson	Grazing	East Asia and Southeast Asia	2	Bovine Meat	Land use	(kha)
Tyson	Grazing	Eastern Europe	0	Bovine Meat	Land use	(kha)
Tyson	Grazing	Latin America and the Caribbean	753	Bovine Meat	Land use	(kha)
Tyson	Grazing	Near East and North Africa	0	Bovine Meat	Land use	(kha)
Tyson	Grazing	North America	31273	Bovine Meat	Land use	(kha)
Tyson	Grazing	Oceania	6923	Bovine Meat	Land use	(kha)
Tyson	Grazing	RoW	0	Bovine Meat	Land use	(kha)
Tyson	Grazing	Russian Federation	0	Bovine Meat	Land use	(kha)
Tyson	Grazing	South Asia	0	Bovine Meat	Land use	(kha)
Tyson	Grazing	Sub-Saharan Africa	0	Bovine Meat	Land use	(kha)
Tyson	Grazing	Western Europe	0	Bovine Meat	Land use	(kha)
Tyson	Croplands	East Asia and Southeast Asia	3	Bovine Meat	Land use	(kha)
Tyson	Croplands	Eastern Europe	2	Bovine Meat	Land use	(kha)
Tyson	Croplands	Latin America and the Caribbean	25	Bovine Meat	Land use	(kha)
Tyson	Croplands	Near East and North Africa	0	Bovine Meat	Land use	(kha)
Tyson	Croplands	North America	2621	Bovine Meat	Land use	(kha)
Tyson	Croplands	Oceania	70	Bovine Meat	Land use	(kha)
Tyson	Croplands	RoW	0	Bovine Meat	Land use	(kha)
Tyson	Croplands	Russian Federation	0	Bovine Meat	Land use	(kha)
Tyson	Croplands	South Asia	6	Bovine Meat	Land use	(kha)
Tyson	Croplands	Sub-Saharan Africa	0	Bovine Meat	Land use	(kha)
Tyson	Croplands	Western Europe	2	Bovine Meat	Land use	(kha)
Vion Food Group	Grazing	East Asia and Southeast Asia	0	Bovine Meat	Land use	(kha)
Vion Food Group	Grazing	Eastern Europe	8	Bovine Meat	Land use	(kha)
Vion Food Group	Grazing	Latin America and the Caribbean	0	Bovine Meat	Land use	(kha)
Vion Food Group	Grazing	Near East and North Africa	0	Bovine Meat	Land use	(kha)
Vion Food Group	Grazing	North America	0	Bovine Meat	Land use	(kha)
Vion Food Group	Grazing	Oceania	0	Bovine Meat	Land use	(kha)
Vion Food Group	Grazing	RoW	0	Bovine Meat	Land use	(kha)
Vion Food Group	Grazing	Russian Federation	0	Bovine Meat	Land use	(kha)
Vion Food Group	Grazing	South Asia	0	Bovine Meat	Land use	(kha)
Vion Food Group	Grazing	Sub-Saharan Africa	0	Bovine Meat	Land use	(kha)
Vion Food Group	Grazing	Western Europe	756	Bovine Meat	Land use	(kha)
Vion Food Group	Croplands	East Asia and Southeast Asia	2	Bovine Meat	Land use	(kha)
Vion Food Group	Croplands	Eastern Europe	23	Bovine Meat	Land use	(kha)
Vion Food Group	Croplands	Latin America and the Caribbean	17	Bovine Meat	Land use	(kha)
Vion Food Group	Croplands	Near East and North Africa	1	Bovine Meat	Land use	(kha)
Vion Food Group	Croplands	North America	9	Bovine Meat	Land use	(kha)
Vion Food Group	Croplands	Oceania	1	Bovine Meat	Land use	(kha)
Vion Food Group	Croplands	RoW	0	Bovine Meat	Land use	(kha)
Vion Food Group	Croplands	Russian Federation	3	Bovine Meat	Land use	(kha)
Vion Food Group	Croplands	South Asia	2	Bovine Meat	Land use	(kha)
Vion Food Group	Croplands	Sub-Saharan Africa	0	Bovine Meat	Land use	(kha)
Vion Food Group	Croplands	Western Europe	159	Bovine Meat	Land use	(kha)
Westfleisch	Grazing	East Asia and Southeast Asia	0	Bovine Meat	Land use	(kha)
Westfleisch	Grazing	Eastern Europe	3	Bovine Meat	Land use	(kha)
Westfleisch	Grazing	Latin America and the Caribbean	0	Bovine Meat	Land use	(kha)
Westfleisch	Grazing	Near East and North Africa	0	Bovine Meat	Land use	(kha)
Westfleisch	Grazing	North America	0	Bovine Meat	Land use	(kha)
Westfleisch	Grazing	Oceania	0	Bovine Meat	Land use	(kha)
Westfleisch	Grazing	RoW	0	Bovine Meat	Land use	(kha)
Westfleisch	Grazing	Russian Federation	0	Bovine Meat	Land use	(kha)
Westfleisch	Grazing	South Asia	0	Bovine Meat	Land use	(kha)
Westfleisch	Grazing	Sub-Saharan Africa	0	Bovine Meat	Land use	(kha)
Westfleisch	Grazing	Western Europe	316	Bovine Meat	Land use	(kha)
Westfleisch	Croplands	East Asia and Southeast Asia	0	Bovine Meat	Land use	(kha)
Westfleisch	Croplands	Eastern Europe	10	Bovine Meat	Land use	(kha)
Westfleisch	Croplands	Latin America and the Caribbean	7	Bovine Meat	Land use	(kha)
Westfleisch	Croplands	Near East and North Africa	0	Bovine Meat	Land use	(kha)
Westfleisch	Croplands	North America	4	Bovine Meat	Land use	(kha)
Westfleisch	Croplands	Oceania	0	Bovine Meat	Land use	(kha)
Westfleisch	Croplands	RoW	0	Bovine Meat	Land use	(kha)
Westfleisch	Croplands	Russian Federation	1	Bovine Meat	Land use	(kha)
Westfleisch	Croplands	South Asia	0	Bovine Meat	Land use	(kha)
Westfleisch	Croplands	Sub-Saharan Africa	0	Bovine Meat	Land use	(kha)
Westfleisch	Croplands	Western Europe	67	Bovine Meat	Land use	(kha)
Bigard	Grazing	East Asia and Southeast Asia	0	Bovine Meat	Blue water	(1,000 m³)
Bigard	Grazing	Eastern Europe	0	Bovine Meat	Blue water	(1,000 m³)
Bigard	Grazing	Latin America and the Caribbean	0	Bovine Meat	Blue water	(1,000 m³)
Bigard	Grazing	Near East and North Africa	0	Bovine Meat	Blue water	(1,000 m³)
Bigard	Grazing	North America	0	Bovine Meat	Blue water	(1,000 m³)
Bigard	Grazing	Oceania	0	Bovine Meat	Blue water	(1,000 m³)
Bigard	Grazing	RoW	0	Bovine Meat	Blue water	(1,000 m³)
Bigard	Grazing	Russian Federation	0	Bovine Meat	Blue water	(1,000 m³)
Bigard	Grazing	South Asia	0	Bovine Meat	Blue water	(1,000 m³)
Bigard	Grazing	Sub-Saharan Africa	0	Bovine Meat	Blue water	(1,000 m³)
Bigard	Grazing	Western Europe	0	Bovine Meat	Blue water	(1,000 m³)
Bigard	Croplands	East Asia and Southeast Asia	784	Bovine Meat	Blue water	(1,000 m³)
Bigard	Croplands	Eastern Europe	8492	Bovine Meat	Blue water	(1,000 m³)
Bigard	Croplands	Latin America and the Caribbean	593	Bovine Meat	Blue water	(1,000 m³)
Bigard	Croplands	Near East and North Africa	4141	Bovine Meat	Blue water	(1,000 m³)
Bigard	Croplands	North America	2806	Bovine Meat	Blue water	(1,000 m³)
Bigard	Croplands	Oceania	28	Bovine Meat	Blue water	(1,000 m³)
Bigard	Croplands	RoW	0	Bovine Meat	Blue water	(1,000 m³)
Bigard	Croplands	Russian Federation	1349	Bovine Meat	Blue water	(1,000 m³)
Bigard	Croplands	South Asia	2548	Bovine Meat	Blue water	(1,000 m³)
Bigard	Croplands	Sub-Saharan Africa	195	Bovine Meat	Blue water	(1,000 m³)
Bigard	Croplands	Western Europe	255837	Bovine Meat	Blue water	(1,000 m³)
Cargill	Grazing	East Asia and Southeast Asia	0	Bovine Meat	Blue water	(1,000 m³)
Cargill	Grazing	Eastern Europe	0	Bovine Meat	Blue water	(1,000 m³)
Cargill	Grazing	Latin America and the Caribbean	0	Bovine Meat	Blue water	(1,000 m³)
Cargill	Grazing	Near East and North Africa	0	Bovine Meat	Blue water	(1,000 m³)
Cargill	Grazing	North America	0	Bovine Meat	Blue water	(1,000 m³)
Cargill	Grazing	Oceania	0	Bovine Meat	Blue water	(1,000 m³)
Cargill	Grazing	RoW	0	Bovine Meat	Blue water	(1,000 m³)
Cargill	Grazing	Russian Federation	0	Bovine Meat	Blue water	(1,000 m³)
Cargill	Grazing	South Asia	0	Bovine Meat	Blue water	(1,000 m³)
Cargill	Grazing	Sub-Saharan Africa	0	Bovine Meat	Blue water	(1,000 m³)
Cargill	Grazing	Western Europe	0	Bovine Meat	Blue water	(1,000 m³)
Cargill	Croplands	East Asia and Southeast Asia	1000	Bovine Meat	Blue water	(1,000 m³)
Cargill	Croplands	Eastern Europe	156	Bovine Meat	Blue water	(1,000 m³)
Cargill	Croplands	Latin America and the Caribbean	39338	Bovine Meat	Blue water	(1,000 m³)
Cargill	Croplands	Near East and North Africa	463	Bovine Meat	Blue water	(1,000 m³)
Cargill	Croplands	North America	2729221	Bovine Meat	Blue water	(1,000 m³)
Cargill	Croplands	Oceania	119132	Bovine Meat	Blue water	(1,000 m³)
Cargill	Croplands	RoW	0	Bovine Meat	Blue water	(1,000 m³)
Cargill	Croplands	Russian Federation	64	Bovine Meat	Blue water	(1,000 m³)
Cargill	Croplands	South Asia	2547	Bovine Meat	Blue water	(1,000 m³)
Cargill	Croplands	Sub-Saharan Africa	675	Bovine Meat	Blue water	(1,000 m³)
Cargill	Croplands	Western Europe	592	Bovine Meat	Blue water	(1,000 m³)
Danish Crown	Grazing	East Asia and Southeast Asia	0	Bovine Meat	Blue water	(1,000 m³)
Danish Crown	Grazing	Eastern Europe	0	Bovine Meat	Blue water	(1,000 m³)
Danish Crown	Grazing	Latin America and the Caribbean	0	Bovine Meat	Blue water	(1,000 m³)
Danish Crown	Grazing	Near East and North Africa	0	Bovine Meat	Blue water	(1,000 m³)
Danish Crown	Grazing	North America	0	Bovine Meat	Blue water	(1,000 m³)
Danish Crown	Grazing	Oceania	0	Bovine Meat	Blue water	(1,000 m³)
Danish Crown	Grazing	RoW	0	Bovine Meat	Blue water	(1,000 m³)
Danish Crown	Grazing	Russian Federation	0	Bovine Meat	Blue water	(1,000 m³)
Danish Crown	Grazing	South Asia	0	Bovine Meat	Blue water	(1,000 m³)
Danish Crown	Grazing	Sub-Saharan Africa	0	Bovine Meat	Blue water	(1,000 m³)
Danish Crown	Grazing	Western Europe	0	Bovine Meat	Blue water	(1,000 m³)
Danish Crown	Croplands	East Asia and Southeast Asia	325	Bovine Meat	Blue water	(1,000 m³)
Danish Crown	Croplands	Eastern Europe	3518	Bovine Meat	Blue water	(1,000 m³)
Danish Crown	Croplands	Latin America and the Caribbean	246	Bovine Meat	Blue water	(1,000 m³)
Danish Crown	Croplands	Near East and North Africa	1716	Bovine Meat	Blue water	(1,000 m³)
Danish Crown	Croplands	North America	1162	Bovine Meat	Blue water	(1,000 m³)
Danish Crown	Croplands	Oceania	12	Bovine Meat	Blue water	(1,000 m³)
Danish Crown	Croplands	RoW	0	Bovine Meat	Blue water	(1,000 m³)
Danish Crown	Croplands	Russian Federation	559	Bovine Meat	Blue water	(1,000 m³)
Danish Crown	Croplands	South Asia	1056	Bovine Meat	Blue water	(1,000 m³)
Danish Crown	Croplands	Sub-Saharan Africa	81	Bovine Meat	Blue water	(1,000 m³)
Danish Crown	Croplands	Western Europe	105983	Bovine Meat	Blue water	(1,000 m³)
Gruppo Cremonini	Grazing	East Asia and Southeast Asia	0	Bovine Meat	Blue water	(1,000 m³)
Gruppo Cremonini	Grazing	Eastern Europe	0	Bovine Meat	Blue water	(1,000 m³)
Gruppo Cremonini	Grazing	Latin America and the Caribbean	0	Bovine Meat	Blue water	(1,000 m³)
Gruppo Cremonini	Grazing	Near East and North Africa	0	Bovine Meat	Blue water	(1,000 m³)
Gruppo Cremonini	Grazing	North America	0	Bovine Meat	Blue water	(1,000 m³)
Gruppo Cremonini	Grazing	Oceania	0	Bovine Meat	Blue water	(1,000 m³)
Gruppo Cremonini	Grazing	RoW	0	Bovine Meat	Blue water	(1,000 m³)
Gruppo Cremonini	Grazing	Russian Federation	0	Bovine Meat	Blue water	(1,000 m³)
Gruppo Cremonini	Grazing	South Asia	0	Bovine Meat	Blue water	(1,000 m³)
Gruppo Cremonini	Grazing	Sub-Saharan Africa	0	Bovine Meat	Blue water	(1,000 m³)
Gruppo Cremonini	Grazing	Western Europe	0	Bovine Meat	Blue water	(1,000 m³)
Gruppo Cremonini	Croplands	East Asia and Southeast Asia	757	Bovine Meat	Blue water	(1,000 m³)
Gruppo Cremonini	Croplands	Eastern Europe	8197	Bovine Meat	Blue water	(1,000 m³)
Gruppo Cremonini	Croplands	Latin America and the Caribbean	573	Bovine Meat	Blue water	(1,000 m³)
Gruppo Cremonini	Croplands	Near East and North Africa	3998	Bovine Meat	Blue water	(1,000 m³)
Gruppo Cremonini	Croplands	North America	2708	Bovine Meat	Blue water	(1,000 m³)
Gruppo Cremonini	Croplands	Oceania	27	Bovine Meat	Blue water	(1,000 m³)
Gruppo Cremonini	Croplands	RoW	0	Bovine Meat	Blue water	(1,000 m³)
Gruppo Cremonini	Croplands	Russian Federation	1303	Bovine Meat	Blue water	(1,000 m³)
Gruppo Cremonini	Croplands	South Asia	2460	Bovine Meat	Blue water	(1,000 m³)
Gruppo Cremonini	Croplands	Sub-Saharan Africa	188	Bovine Meat	Blue water	(1,000 m³)
Gruppo Cremonini	Croplands	Western Europe	246960	Bovine Meat	Blue water	(1,000 m³)
JBS	Grazing	East Asia and Southeast Asia	0	Bovine Meat	Blue water	(1,000 m³)
JBS	Grazing	Eastern Europe	0	Bovine Meat	Blue water	(1,000 m³)
JBS	Grazing	Latin America and the Caribbean	0	Bovine Meat	Blue water	(1,000 m³)
JBS	Grazing	Near East and North Africa	0	Bovine Meat	Blue water	(1,000 m³)
JBS	Grazing	North America	0	Bovine Meat	Blue water	(1,000 m³)
JBS	Grazing	Oceania	0	Bovine Meat	Blue water	(1,000 m³)
JBS	Grazing	RoW	0	Bovine Meat	Blue water	(1,000 m³)
JBS	Grazing	Russian Federation	0	Bovine Meat	Blue water	(1,000 m³)
JBS	Grazing	South Asia	0	Bovine Meat	Blue water	(1,000 m³)
JBS	Grazing	Sub-Saharan Africa	0	Bovine Meat	Blue water	(1,000 m³)
JBS	Grazing	Western Europe	0	Bovine Meat	Blue water	(1,000 m³)
JBS	Croplands	East Asia and Southeast Asia	1746	Bovine Meat	Blue water	(1,000 m³)
JBS	Croplands	Eastern Europe	318	Bovine Meat	Blue water	(1,000 m³)
JBS	Croplands	Latin America and the Caribbean	2349078	Bovine Meat	Blue water	(1,000 m³)
JBS	Croplands	Near East and North Africa	7097	Bovine Meat	Blue water	(1,000 m³)
JBS	Croplands	North America	3534499	Bovine Meat	Blue water	(1,000 m³)
JBS	Croplands	Oceania	418502	Bovine Meat	Blue water	(1,000 m³)
JBS	Croplands	RoW	0	Bovine Meat	Blue water	(1,000 m³)
JBS	Croplands	Russian Federation	335	Bovine Meat	Blue water	(1,000 m³)
JBS	Croplands	South Asia	5364	Bovine Meat	Blue water	(1,000 m³)
JBS	Croplands	Sub-Saharan Africa	1082	Bovine Meat	Blue water	(1,000 m³)
JBS	Croplands	Western Europe	1331	Bovine Meat	Blue water	(1,000 m³)
Marfrig	Grazing	East Asia and Southeast Asia	0	Bovine Meat	Blue water	(1,000 m³)
Marfrig	Grazing	Eastern Europe	0	Bovine Meat	Blue water	(1,000 m³)
Marfrig	Grazing	Latin America and the Caribbean	0	Bovine Meat	Blue water	(1,000 m³)
Marfrig	Grazing	Near East and North Africa	0	Bovine Meat	Blue water	(1,000 m³)
Marfrig	Grazing	North America	0	Bovine Meat	Blue water	(1,000 m³)
Marfrig	Grazing	Oceania	0	Bovine Meat	Blue water	(1,000 m³)
Marfrig	Grazing	RoW	0	Bovine Meat	Blue water	(1,000 m³)
Marfrig	Grazing	Russian Federation	0	Bovine Meat	Blue water	(1,000 m³)
Marfrig	Grazing	South Asia	0	Bovine Meat	Blue water	(1,000 m³)
Marfrig	Grazing	Sub-Saharan Africa	0	Bovine Meat	Blue water	(1,000 m³)
Marfrig	Grazing	Western Europe	0	Bovine Meat	Blue water	(1,000 m³)
Marfrig	Croplands	East Asia and Southeast Asia	646	Bovine Meat	Blue water	(1,000 m³)
Marfrig	Croplands	Eastern Europe	111	Bovine Meat	Blue water	(1,000 m³)
Marfrig	Croplands	Latin America and the Caribbean	1178155	Bovine Meat	Blue water	(1,000 m³)
Marfrig	Croplands	Near East and North Africa	3440	Bovine Meat	Blue water	(1,000 m³)
Marfrig	Croplands	North America	1424335	Bovine Meat	Blue water	(1,000 m³)
Marfrig	Croplands	Oceania	153	Bovine Meat	Blue water	(1,000 m³)
Marfrig	Croplands	RoW	0	Bovine Meat	Blue water	(1,000 m³)
Marfrig	Croplands	Russian Federation	152	Bovine Meat	Blue water	(1,000 m³)
Marfrig	Croplands	South Asia	1934	Bovine Meat	Blue water	(1,000 m³)
Marfrig	Croplands	Sub-Saharan Africa	450	Bovine Meat	Blue water	(1,000 m³)
Marfrig	Croplands	Western Europe	570	Bovine Meat	Blue water	(1,000 m³)
Minerva	Grazing	East Asia and Southeast Asia	0	Bovine Meat	Blue water	(1,000 m³)
Minerva	Grazing	Eastern Europe	0	Bovine Meat	Blue water	(1,000 m³)
Minerva	Grazing	Latin America and the Caribbean	0	Bovine Meat	Blue water	(1,000 m³)
Minerva	Grazing	Near East and North Africa	0	Bovine Meat	Blue water	(1,000 m³)
Minerva	Grazing	North America	0	Bovine Meat	Blue water	(1,000 m³)
Minerva	Grazing	Oceania	0	Bovine Meat	Blue water	(1,000 m³)
Minerva	Grazing	RoW	0	Bovine Meat	Blue water	(1,000 m³)
Minerva	Grazing	Russian Federation	0	Bovine Meat	Blue water	(1,000 m³)
Minerva	Grazing	South Asia	0	Bovine Meat	Blue water	(1,000 m³)
Minerva	Grazing	Sub-Saharan Africa	0	Bovine Meat	Blue water	(1,000 m³)
Minerva	Grazing	Western Europe	0	Bovine Meat	Blue water	(1,000 m³)
Minerva	Croplands	East Asia and Southeast Asia	137	Bovine Meat	Blue water	(1,000 m³)
Minerva	Croplands	Eastern Europe	33	Bovine Meat	Blue water	(1,000 m³)
Minerva	Croplands	Latin America and the Caribbean	965835	Bovine Meat	Blue water	(1,000 m³)
Minerva	Croplands	Near East and North Africa	2690	Bovine Meat	Blue water	(1,000 m³)
Minerva	Croplands	North America	17328	Bovine Meat	Blue water	(1,000 m³)
Minerva	Croplands	Oceania	25	Bovine Meat	Blue water	(1,000 m³)
Minerva	Croplands	RoW	0	Bovine Meat	Blue water	(1,000 m³)
Minerva	Croplands	Russian Federation	102	Bovine Meat	Blue water	(1,000 m³)
Minerva	Croplands	South Asia	634	Bovine Meat	Blue water	(1,000 m³)
Minerva	Croplands	Sub-Saharan Africa	87	Bovine Meat	Blue water	(1,000 m³)
Minerva	Croplands	Western Europe	228	Bovine Meat	Blue water	(1,000 m³)
NH Foods	Grazing	East Asia and Southeast Asia	0	Bovine Meat	Blue water	(1,000 m³)
NH Foods	Grazing	Eastern Europe	0	Bovine Meat	Blue water	(1,000 m³)
NH Foods	Grazing	Latin America and the Caribbean	0	Bovine Meat	Blue water	(1,000 m³)
NH Foods	Grazing	Near East and North Africa	0	Bovine Meat	Blue water	(1,000 m³)
NH Foods	Grazing	North America	0	Bovine Meat	Blue water	(1,000 m³)
NH Foods	Grazing	Oceania	0	Bovine Meat	Blue water	(1,000 m³)
NH Foods	Grazing	RoW	0	Bovine Meat	Blue water	(1,000 m³)
NH Foods	Grazing	Russian Federation	0	Bovine Meat	Blue water	(1,000 m³)
NH Foods	Grazing	South Asia	0	Bovine Meat	Blue water	(1,000 m³)
NH Foods	Grazing	Sub-Saharan Africa	0	Bovine Meat	Blue water	(1,000 m³)
NH Foods	Grazing	Western Europe	0	Bovine Meat	Blue water	(1,000 m³)
NH Foods	Croplands	East Asia and Southeast Asia	28	Bovine Meat	Blue water	(1,000 m³)
NH Foods	Croplands	Eastern Europe	8	Bovine Meat	Blue water	(1,000 m³)
NH Foods	Croplands	Latin America and the Caribbean	50	Bovine Meat	Blue water	(1,000 m³)
NH Foods	Croplands	Near East and North Africa	20	Bovine Meat	Blue water	(1,000 m³)
NH Foods	Croplands	North America	83	Bovine Meat	Blue water	(1,000 m³)
NH Foods	Croplands	Oceania	53399	Bovine Meat	Blue water	(1,000 m³)
NH Foods	Croplands	RoW	0	Bovine Meat	Blue water	(1,000 m³)
NH Foods	Croplands	Russian Federation	2	Bovine Meat	Blue water	(1,000 m³)
NH Foods	Croplands	South Asia	119	Bovine Meat	Blue water	(1,000 m³)
NH Foods	Croplands	Sub-Saharan Africa	2	Bovine Meat	Blue water	(1,000 m³)
NH Foods	Croplands	Western Europe	6	Bovine Meat	Blue water	(1,000 m³)
Teys	Grazing	East Asia and Southeast Asia	0	Bovine Meat	Blue water	(1,000 m³)
Teys	Grazing	Eastern Europe	0	Bovine Meat	Blue water	(1,000 m³)
Teys	Grazing	Latin America and the Caribbean	0	Bovine Meat	Blue water	(1,000 m³)
Teys	Grazing	Near East and North Africa	0	Bovine Meat	Blue water	(1,000 m³)
Teys	Grazing	North America	0	Bovine Meat	Blue water	(1,000 m³)
Teys	Grazing	Oceania	0	Bovine Meat	Blue water	(1,000 m³)
Teys	Grazing	RoW	0	Bovine Meat	Blue water	(1,000 m³)
Teys	Grazing	Russian Federation	0	Bovine Meat	Blue water	(1,000 m³)
Teys	Grazing	South Asia	0	Bovine Meat	Blue water	(1,000 m³)
Teys	Grazing	Sub-Saharan Africa	0	Bovine Meat	Blue water	(1,000 m³)
Teys	Grazing	Western Europe	0	Bovine Meat	Blue water	(1,000 m³)
Teys	Croplands	East Asia and Southeast Asia	63	Bovine Meat	Blue water	(1,000 m³)
Teys	Croplands	Eastern Europe	18	Bovine Meat	Blue water	(1,000 m³)
Teys	Croplands	Latin America and the Caribbean	110	Bovine Meat	Blue water	(1,000 m³)
Teys	Croplands	Near East and North Africa	45	Bovine Meat	Blue water	(1,000 m³)
Teys	Croplands	North America	184	Bovine Meat	Blue water	(1,000 m³)
Teys	Croplands	Oceania	118891	Bovine Meat	Blue water	(1,000 m³)
Teys	Croplands	RoW	0	Bovine Meat	Blue water	(1,000 m³)
Teys	Croplands	Russian Federation	5	Bovine Meat	Blue water	(1,000 m³)
Teys	Croplands	South Asia	266	Bovine Meat	Blue water	(1,000 m³)
Teys	Croplands	Sub-Saharan Africa	5	Bovine Meat	Blue water	(1,000 m³)
Teys	Croplands	Western Europe	14	Bovine Meat	Blue water	(1,000 m³)
Tönnies Group	Grazing	East Asia and Southeast Asia	0	Bovine Meat	Blue water	(1,000 m³)
Tönnies Group	Grazing	Eastern Europe	0	Bovine Meat	Blue water	(1,000 m³)
Tönnies Group	Grazing	Latin America and the Caribbean	0	Bovine Meat	Blue water	(1,000 m³)
Tönnies Group	Grazing	Near East and North Africa	0	Bovine Meat	Blue water	(1,000 m³)
Tönnies Group	Grazing	North America	0	Bovine Meat	Blue water	(1,000 m³)
Tönnies Group	Grazing	Oceania	0	Bovine Meat	Blue water	(1,000 m³)
Tönnies Group	Grazing	RoW	0	Bovine Meat	Blue water	(1,000 m³)
Tönnies Group	Grazing	Russian Federation	0	Bovine Meat	Blue water	(1,000 m³)
Tönnies Group	Grazing	South Asia	0	Bovine Meat	Blue water	(1,000 m³)
Tönnies Group	Grazing	Sub-Saharan Africa	0	Bovine Meat	Blue water	(1,000 m³)
Tönnies Group	Grazing	Western Europe	0	Bovine Meat	Blue water	(1,000 m³)
Tönnies Group	Croplands	East Asia and Southeast Asia	148	Bovine Meat	Blue water	(1,000 m³)
Tönnies Group	Croplands	Eastern Europe	1601	Bovine Meat	Blue water	(1,000 m³)
Tönnies Group	Croplands	Latin America and the Caribbean	112	Bovine Meat	Blue water	(1,000 m³)
Tönnies Group	Croplands	Near East and North Africa	781	Bovine Meat	Blue water	(1,000 m³)
Tönnies Group	Croplands	North America	529	Bovine Meat	Blue water	(1,000 m³)
Tönnies Group	Croplands	Oceania	5	Bovine Meat	Blue water	(1,000 m³)
Tönnies Group	Croplands	RoW	0	Bovine Meat	Blue water	(1,000 m³)
Tönnies Group	Croplands	Russian Federation	254	Bovine Meat	Blue water	(1,000 m³)
Tönnies Group	Croplands	South Asia	480	Bovine Meat	Blue water	(1,000 m³)
Tönnies Group	Croplands	Sub-Saharan Africa	37	Bovine Meat	Blue water	(1,000 m³)
Tönnies Group	Croplands	Western Europe	48222	Bovine Meat	Blue water	(1,000 m³)
Tyson	Grazing	East Asia and Southeast Asia	0	Bovine Meat	Blue water	(1,000 m³)
Tyson	Grazing	Eastern Europe	0	Bovine Meat	Blue water	(1,000 m³)
Tyson	Grazing	Latin America and the Caribbean	0	Bovine Meat	Blue water	(1,000 m³)
Tyson	Grazing	Near East and North Africa	0	Bovine Meat	Blue water	(1,000 m³)
Tyson	Grazing	North America	0	Bovine Meat	Blue water	(1,000 m³)
Tyson	Grazing	Oceania	0	Bovine Meat	Blue water	(1,000 m³)
Tyson	Grazing	RoW	0	Bovine Meat	Blue water	(1,000 m³)
Tyson	Grazing	Russian Federation	0	Bovine Meat	Blue water	(1,000 m³)
Tyson	Grazing	South Asia	0	Bovine Meat	Blue water	(1,000 m³)
Tyson	Grazing	Sub-Saharan Africa	0	Bovine Meat	Blue water	(1,000 m³)
Tyson	Grazing	Western Europe	0	Bovine Meat	Blue water	(1,000 m³)
Tyson	Croplands	East Asia and Southeast Asia	830	Bovine Meat	Blue water	(1,000 m³)
Tyson	Croplands	Eastern Europe	128	Bovine Meat	Blue water	(1,000 m³)
Tyson	Croplands	Latin America and the Caribbean	33201	Bovine Meat	Blue water	(1,000 m³)
Tyson	Croplands	Near East and North Africa	380	Bovine Meat	Blue water	(1,000 m³)
Tyson	Croplands	North America	2305207	Bovine Meat	Blue water	(1,000 m³)
Tyson	Croplands	Oceania	72301	Bovine Meat	Blue water	(1,000 m³)
Tyson	Croplands	RoW	0	Bovine Meat	Blue water	(1,000 m³)
Tyson	Croplands	Russian Federation	52	Bovine Meat	Blue water	(1,000 m³)
Tyson	Croplands	South Asia	2088	Bovine Meat	Blue water	(1,000 m³)
Tyson	Croplands	Sub-Saharan Africa	569	Bovine Meat	Blue water	(1,000 m³)
Tyson	Croplands	Western Europe	497	Bovine Meat	Blue water	(1,000 m³)
Vion Food Group	Grazing	East Asia and Southeast Asia	0	Bovine Meat	Blue water	(1,000 m³)
Vion Food Group	Grazing	Eastern Europe	0	Bovine Meat	Blue water	(1,000 m³)
Vion Food Group	Grazing	Latin America and the Caribbean	0	Bovine Meat	Blue water	(1,000 m³)
Vion Food Group	Grazing	Near East and North Africa	0	Bovine Meat	Blue water	(1,000 m³)
Vion Food Group	Grazing	North America	0	Bovine Meat	Blue water	(1,000 m³)
Vion Food Group	Grazing	Oceania	0	Bovine Meat	Blue water	(1,000 m³)
Vion Food Group	Grazing	RoW	0	Bovine Meat	Blue water	(1,000 m³)
Vion Food Group	Grazing	Russian Federation	0	Bovine Meat	Blue water	(1,000 m³)
Vion Food Group	Grazing	South Asia	0	Bovine Meat	Blue water	(1,000 m³)
Vion Food Group	Grazing	Sub-Saharan Africa	0	Bovine Meat	Blue water	(1,000 m³)
Vion Food Group	Grazing	Western Europe	0	Bovine Meat	Blue water	(1,000 m³)
Vion Food Group	Croplands	East Asia and Southeast Asia	370	Bovine Meat	Blue water	(1,000 m³)
Vion Food Group	Croplands	Eastern Europe	4001	Bovine Meat	Blue water	(1,000 m³)
Vion Food Group	Croplands	Latin America and the Caribbean	280	Bovine Meat	Blue water	(1,000 m³)
Vion Food Group	Croplands	Near East and North Africa	1952	Bovine Meat	Blue water	(1,000 m³)
Vion Food Group	Croplands	North America	1322	Bovine Meat	Blue water	(1,000 m³)
Vion Food Group	Croplands	Oceania	13	Bovine Meat	Blue water	(1,000 m³)
Vion Food Group	Croplands	RoW	0	Bovine Meat	Blue water	(1,000 m³)
Vion Food Group	Croplands	Russian Federation	636	Bovine Meat	Blue water	(1,000 m³)
Vion Food Group	Croplands	South Asia	1201	Bovine Meat	Blue water	(1,000 m³)
Vion Food Group	Croplands	Sub-Saharan Africa	92	Bovine Meat	Blue water	(1,000 m³)
Vion Food Group	Croplands	Western Europe	120556	Bovine Meat	Blue water	(1,000 m³)
Westfleisch	Grazing	East Asia and Southeast Asia	0	Bovine Meat	Blue water	(1,000 m³)
Westfleisch	Grazing	Eastern Europe	0	Bovine Meat	Blue water	(1,000 m³)
Westfleisch	Grazing	Latin America and the Caribbean	0	Bovine Meat	Blue water	(1,000 m³)
Westfleisch	Grazing	Near East and North Africa	0	Bovine Meat	Blue water	(1,000 m³)
Westfleisch	Grazing	North America	0	Bovine Meat	Blue water	(1,000 m³)
Westfleisch	Grazing	Oceania	0	Bovine Meat	Blue water	(1,000 m³)
Westfleisch	Grazing	RoW	0	Bovine Meat	Blue water	(1,000 m³)
Westfleisch	Grazing	Russian Federation	0	Bovine Meat	Blue water	(1,000 m³)
Westfleisch	Grazing	South Asia	0	Bovine Meat	Blue water	(1,000 m³)
Westfleisch	Grazing	Sub-Saharan Africa	0	Bovine Meat	Blue water	(1,000 m³)
Westfleisch	Grazing	Western Europe	0	Bovine Meat	Blue water	(1,000 m³)
Westfleisch	Croplands	East Asia and Southeast Asia	155	Bovine Meat	Blue water	(1,000 m³)
Westfleisch	Croplands	Eastern Europe	1674	Bovine Meat	Blue water	(1,000 m³)
Westfleisch	Croplands	Latin America and the Caribbean	117	Bovine Meat	Blue water	(1,000 m³)
Westfleisch	Croplands	Near East and North Africa	817	Bovine Meat	Blue water	(1,000 m³)
Westfleisch	Croplands	North America	553	Bovine Meat	Blue water	(1,000 m³)
Westfleisch	Croplands	Oceania	5	Bovine Meat	Blue water	(1,000 m³)
Westfleisch	Croplands	RoW	0	Bovine Meat	Blue water	(1,000 m³)
Westfleisch	Croplands	Russian Federation	266	Bovine Meat	Blue water	(1,000 m³)
Westfleisch	Croplands	South Asia	503	Bovine Meat	Blue water	(1,000 m³)
Westfleisch	Croplands	Sub-Saharan Africa	38	Bovine Meat	Blue water	(1,000 m³)
Westfleisch	Croplands	Western Europe	50448	Bovine Meat	Blue water	(1,000 m³)
Bigard	Grazing	East Asia and Southeast Asia	101	Bovine Meat	Green water	(1,000 m³)
Bigard	Grazing	Eastern Europe	14514	Bovine Meat	Green water	(1,000 m³)
Bigard	Grazing	Latin America and the Caribbean	614	Bovine Meat	Green water	(1,000 m³)
Bigard	Grazing	Near East and North Africa	30	Bovine Meat	Green water	(1,000 m³)
Bigard	Grazing	North America	309	Bovine Meat	Green water	(1,000 m³)
Bigard	Grazing	Oceania	117	Bovine Meat	Green water	(1,000 m³)
Bigard	Grazing	RoW	0	Bovine Meat	Green water	(1,000 m³)
Bigard	Grazing	Russian Federation	5	Bovine Meat	Green water	(1,000 m³)
Bigard	Grazing	South Asia	114	Bovine Meat	Green water	(1,000 m³)
Bigard	Grazing	Sub-Saharan Africa	248	Bovine Meat	Green water	(1,000 m³)
Bigard	Grazing	Western Europe	1530818	Bovine Meat	Green water	(1,000 m³)
Bigard	Croplands	East Asia and Southeast Asia	38101	Bovine Meat	Green water	(1,000 m³)
Bigard	Croplands	Eastern Europe	273866	Bovine Meat	Green water	(1,000 m³)
Bigard	Croplands	Latin America and the Caribbean	264753	Bovine Meat	Green water	(1,000 m³)
Bigard	Croplands	Near East and North Africa	9834	Bovine Meat	Green water	(1,000 m³)
Bigard	Croplands	North America	95918	Bovine Meat	Green water	(1,000 m³)
Bigard	Croplands	Oceania	7509	Bovine Meat	Green water	(1,000 m³)
Bigard	Croplands	RoW	0	Bovine Meat	Green water	(1,000 m³)
Bigard	Croplands	Russian Federation	40029	Bovine Meat	Green water	(1,000 m³)
Bigard	Croplands	South Asia	14445	Bovine Meat	Green water	(1,000 m³)
Bigard	Croplands	Sub-Saharan Africa	8002	Bovine Meat	Green water	(1,000 m³)
Bigard	Croplands	Western Europe	2202015	Bovine Meat	Green water	(1,000 m³)
Cargill	Grazing	East Asia and Southeast Asia	3065	Bovine Meat	Green water	(1,000 m³)
Cargill	Grazing	Eastern Europe	68	Bovine Meat	Green water	(1,000 m³)
Cargill	Grazing	Latin America and the Caribbean	637041	Bovine Meat	Green water	(1,000 m³)
Cargill	Grazing	Near East and North Africa	72	Bovine Meat	Green water	(1,000 m³)
Cargill	Grazing	North America	23447986	Bovine Meat	Green water	(1,000 m³)
Cargill	Grazing	Oceania	2865165	Bovine Meat	Green water	(1,000 m³)
Cargill	Grazing	RoW	0	Bovine Meat	Green water	(1,000 m³)
Cargill	Grazing	Russian Federation	12	Bovine Meat	Green water	(1,000 m³)
Cargill	Grazing	South Asia	438	Bovine Meat	Green water	(1,000 m³)
Cargill	Grazing	Sub-Saharan Africa	790	Bovine Meat	Green water	(1,000 m³)
Cargill	Grazing	Western Europe	892	Bovine Meat	Green water	(1,000 m³)
Cargill	Croplands	East Asia and Southeast Asia	54273	Bovine Meat	Green water	(1,000 m³)
Cargill	Croplands	Eastern Europe	11560	Bovine Meat	Green water	(1,000 m³)
Cargill	Croplands	Latin America and the Caribbean	223097	Bovine Meat	Green water	(1,000 m³)
Cargill	Croplands	Near East and North Africa	2006	Bovine Meat	Green water	(1,000 m³)
Cargill	Croplands	North America	15559194	Bovine Meat	Green water	(1,000 m³)
Cargill	Croplands	Oceania	365610	Bovine Meat	Green water	(1,000 m³)
Cargill	Croplands	RoW	115	Bovine Meat	Green water	(1,000 m³)
Cargill	Croplands	Russian Federation	2769	Bovine Meat	Green water	(1,000 m³)
Cargill	Croplands	South Asia	31178	Bovine Meat	Green water	(1,000 m³)
Cargill	Croplands	Sub-Saharan Africa	4370	Bovine Meat	Green water	(1,000 m³)
Cargill	Croplands	Western Europe	10130	Bovine Meat	Green water	(1,000 m³)
Danish Crown	Grazing	East Asia and Southeast Asia	42	Bovine Meat	Green water	(1,000 m³)
Danish Crown	Grazing	Eastern Europe	6013	Bovine Meat	Green water	(1,000 m³)
Danish Crown	Grazing	Latin America and the Caribbean	255	Bovine Meat	Green water	(1,000 m³)
Danish Crown	Grazing	Near East and North Africa	12	Bovine Meat	Green water	(1,000 m³)
Danish Crown	Grazing	North America	128	Bovine Meat	Green water	(1,000 m³)
Danish Crown	Grazing	Oceania	49	Bovine Meat	Green water	(1,000 m³)
Danish Crown	Grazing	RoW	0	Bovine Meat	Green water	(1,000 m³)
Danish Crown	Grazing	Russian Federation	2	Bovine Meat	Green water	(1,000 m³)
Danish Crown	Grazing	South Asia	47	Bovine Meat	Green water	(1,000 m³)
Danish Crown	Grazing	Sub-Saharan Africa	103	Bovine Meat	Green water	(1,000 m³)
Danish Crown	Grazing	Western Europe	634157	Bovine Meat	Green water	(1,000 m³)
Danish Crown	Croplands	East Asia and Southeast Asia	15784	Bovine Meat	Green water	(1,000 m³)
Danish Crown	Croplands	Eastern Europe	113452	Bovine Meat	Green water	(1,000 m³)
Danish Crown	Croplands	Latin America and the Caribbean	109677	Bovine Meat	Green water	(1,000 m³)
Danish Crown	Croplands	Near East and North Africa	4074	Bovine Meat	Green water	(1,000 m³)
Danish Crown	Croplands	North America	39735	Bovine Meat	Green water	(1,000 m³)
Danish Crown	Croplands	Oceania	3111	Bovine Meat	Green water	(1,000 m³)
Danish Crown	Croplands	RoW	0	Bovine Meat	Green water	(1,000 m³)
Danish Crown	Croplands	Russian Federation	16583	Bovine Meat	Green water	(1,000 m³)
Danish Crown	Croplands	South Asia	5984	Bovine Meat	Green water	(1,000 m³)
Danish Crown	Croplands	Sub-Saharan Africa	3315	Bovine Meat	Green water	(1,000 m³)
Danish Crown	Croplands	Western Europe	912208	Bovine Meat	Green water	(1,000 m³)
Gruppo Cremonini	Grazing	East Asia and Southeast Asia	97	Bovine Meat	Green water	(1,000 m³)
Gruppo Cremonini	Grazing	Eastern Europe	14010	Bovine Meat	Green water	(1,000 m³)
Gruppo Cremonini	Grazing	Latin America and the Caribbean	593	Bovine Meat	Green water	(1,000 m³)
Gruppo Cremonini	Grazing	Near East and North Africa	29	Bovine Meat	Green water	(1,000 m³)
Gruppo Cremonini	Grazing	North America	298	Bovine Meat	Green water	(1,000 m³)
Gruppo Cremonini	Grazing	Oceania	113	Bovine Meat	Green water	(1,000 m³)
Gruppo Cremonini	Grazing	RoW	0	Bovine Meat	Green water	(1,000 m³)
Gruppo Cremonini	Grazing	Russian Federation	5	Bovine Meat	Green water	(1,000 m³)
Gruppo Cremonini	Grazing	South Asia	110	Bovine Meat	Green water	(1,000 m³)
Gruppo Cremonini	Grazing	Sub-Saharan Africa	240	Bovine Meat	Green water	(1,000 m³)
Gruppo Cremonini	Grazing	Western Europe	1477701	Bovine Meat	Green water	(1,000 m³)
Gruppo Cremonini	Croplands	East Asia and Southeast Asia	36779	Bovine Meat	Green water	(1,000 m³)
Gruppo Cremonini	Croplands	Eastern Europe	264364	Bovine Meat	Green water	(1,000 m³)
Gruppo Cremonini	Croplands	Latin America and the Caribbean	255567	Bovine Meat	Green water	(1,000 m³)
Gruppo Cremonini	Croplands	Near East and North Africa	9493	Bovine Meat	Green water	(1,000 m³)
Gruppo Cremonini	Croplands	North America	92590	Bovine Meat	Green water	(1,000 m³)
Gruppo Cremonini	Croplands	Oceania	7249	Bovine Meat	Green water	(1,000 m³)
Gruppo Cremonini	Croplands	RoW	0	Bovine Meat	Green water	(1,000 m³)
Gruppo Cremonini	Croplands	Russian Federation	38640	Bovine Meat	Green water	(1,000 m³)
Gruppo Cremonini	Croplands	South Asia	13944	Bovine Meat	Green water	(1,000 m³)
Gruppo Cremonini	Croplands	Sub-Saharan Africa	7724	Bovine Meat	Green water	(1,000 m³)
Gruppo Cremonini	Croplands	Western Europe	2125610	Bovine Meat	Green water	(1,000 m³)
JBS	Grazing	East Asia and Southeast Asia	4135	Bovine Meat	Green water	(1,000 m³)
JBS	Grazing	Eastern Europe	200	Bovine Meat	Green water	(1,000 m³)
JBS	Grazing	Latin America and the Caribbean	75583784	Bovine Meat	Green water	(1,000 m³)
JBS	Grazing	Near East and North Africa	191	Bovine Meat	Green water	(1,000 m³)
JBS	Grazing	North America	30021160	Bovine Meat	Green water	(1,000 m³)
JBS	Grazing	Oceania	10065152	Bovine Meat	Green water	(1,000 m³)
JBS	Grazing	RoW	0	Bovine Meat	Green water	(1,000 m³)
JBS	Grazing	Russian Federation	26	Bovine Meat	Green water	(1,000 m³)
JBS	Grazing	South Asia	1037	Bovine Meat	Green water	(1,000 m³)
JBS	Grazing	Sub-Saharan Africa	1158	Bovine Meat	Green water	(1,000 m³)
JBS	Grazing	Western Europe	1906	Bovine Meat	Green water	(1,000 m³)
JBS	Croplands	East Asia and Southeast Asia	174349	Bovine Meat	Green water	(1,000 m³)
JBS	Croplands	Eastern Europe	21553	Bovine Meat	Green water	(1,000 m³)
JBS	Croplands	Latin America and the Caribbean	16270589	Bovine Meat	Green water	(1,000 m³)
JBS	Croplands	Near East and North Africa	10541	Bovine Meat	Green water	(1,000 m³)
JBS	Croplands	North America	20463009	Bovine Meat	Green water	(1,000 m³)
JBS	Croplands	Oceania	1281643	Bovine Meat	Green water	(1,000 m³)
JBS	Croplands	RoW	149	Bovine Meat	Green water	(1,000 m³)
JBS	Croplands	Russian Federation	13997	Bovine Meat	Green water	(1,000 m³)
JBS	Croplands	South Asia	53821	Bovine Meat	Green water	(1,000 m³)
JBS	Croplands	Sub-Saharan Africa	34316	Bovine Meat	Green water	(1,000 m³)
JBS	Croplands	Western Europe	19178	Bovine Meat	Green water	(1,000 m³)
Marfrig	Grazing	East Asia and Southeast Asia	1655	Bovine Meat	Green water	(1,000 m³)
Marfrig	Grazing	Eastern Europe	87	Bovine Meat	Green water	(1,000 m³)
Marfrig	Grazing	Latin America and the Caribbean	37996043	Bovine Meat	Green water	(1,000 m³)
Marfrig	Grazing	Near East and North Africa	79	Bovine Meat	Green water	(1,000 m³)
Marfrig	Grazing	North America	12065694	Bovine Meat	Green water	(1,000 m³)
Marfrig	Grazing	Oceania	2990	Bovine Meat	Green water	(1,000 m³)
Marfrig	Grazing	RoW	0	Bovine Meat	Green water	(1,000 m³)
Marfrig	Grazing	Russian Federation	11	Bovine Meat	Green water	(1,000 m³)
Marfrig	Grazing	South Asia	406	Bovine Meat	Green water	(1,000 m³)
Marfrig	Grazing	Sub-Saharan Africa	480	Bovine Meat	Green water	(1,000 m³)
Marfrig	Grazing	Western Europe	744	Bovine Meat	Green water	(1,000 m³)
Marfrig	Croplands	East Asia and Southeast Asia	7427	Bovine Meat	Green water	(1,000 m³)
Marfrig	Croplands	Eastern Europe	7497	Bovine Meat	Green water	(1,000 m³)
Marfrig	Croplands	Latin America and the Caribbean	8086445	Bovine Meat	Green water	(1,000 m³)
Marfrig	Croplands	Near East and North Africa	4769	Bovine Meat	Green water	(1,000 m³)
Marfrig	Croplands	North America	8270833	Bovine Meat	Green water	(1,000 m³)
Marfrig	Croplands	Oceania	1474	Bovine Meat	Green water	(1,000 m³)
Marfrig	Croplands	RoW	59	Bovine Meat	Green water	(1,000 m³)
Marfrig	Croplands	Russian Federation	6278	Bovine Meat	Green water	(1,000 m³)
Marfrig	Croplands	South Asia	20049	Bovine Meat	Green water	(1,000 m³)
Marfrig	Croplands	Sub-Saharan Africa	16331	Bovine Meat	Green water	(1,000 m³)
Marfrig	Croplands	Western Europe	6997	Bovine Meat	Green water	(1,000 m³)
Minerva	Grazing	East Asia and Southeast Asia	73	Bovine Meat	Green water	(1,000 m³)
Minerva	Grazing	Eastern Europe	44	Bovine Meat	Green water	(1,000 m³)
Minerva	Grazing	Latin America and the Caribbean	31418072	Bovine Meat	Green water	(1,000 m³)
Minerva	Grazing	Near East and North Africa	37	Bovine Meat	Green water	(1,000 m³)
Minerva	Grazing	North America	5226	Bovine Meat	Green water	(1,000 m³)
Minerva	Grazing	Oceania	195	Bovine Meat	Green water	(1,000 m³)
Minerva	Grazing	RoW	0	Bovine Meat	Green water	(1,000 m³)
Minerva	Grazing	Russian Federation	4	Bovine Meat	Green water	(1,000 m³)
Minerva	Grazing	South Asia	166	Bovine Meat	Green water	(1,000 m³)
Minerva	Grazing	Sub-Saharan Africa	62	Bovine Meat	Green water	(1,000 m³)
Minerva	Grazing	Western Europe	264	Bovine Meat	Green water	(1,000 m³)
Minerva	Croplands	East Asia and Southeast Asia	2077	Bovine Meat	Green water	(1,000 m³)
Minerva	Croplands	Eastern Europe	1778	Bovine Meat	Green water	(1,000 m³)
Minerva	Croplands	Latin America and the Caribbean	6670277	Bovine Meat	Green water	(1,000 m³)
Minerva	Croplands	Near East and North Africa	3190	Bovine Meat	Green water	(1,000 m³)
Minerva	Croplands	North America	226328	Bovine Meat	Green water	(1,000 m³)
Minerva	Croplands	Oceania	292	Bovine Meat	Green water	(1,000 m³)
Minerva	Croplands	RoW	0	Bovine Meat	Green water	(1,000 m³)
Minerva	Croplands	Russian Federation	4157	Bovine Meat	Green water	(1,000 m³)
Minerva	Croplands	South Asia	4132	Bovine Meat	Green water	(1,000 m³)
Minerva	Croplands	Sub-Saharan Africa	11848	Bovine Meat	Green water	(1,000 m³)
Minerva	Croplands	Western Europe	1842	Bovine Meat	Green water	(1,000 m³)
NH Foods	Grazing	East Asia and Southeast Asia	8	Bovine Meat	Green water	(1,000 m³)
NH Foods	Grazing	Eastern Europe	1	Bovine Meat	Green water	(1,000 m³)
NH Foods	Grazing	Latin America and the Caribbean	7	Bovine Meat	Green water	(1,000 m³)
NH Foods	Grazing	Near East and North Africa	2	Bovine Meat	Green water	(1,000 m³)
NH Foods	Grazing	North America	10	Bovine Meat	Green water	(1,000 m³)
NH Foods	Grazing	Oceania	1284468	Bovine Meat	Green water	(1,000 m³)
NH Foods	Grazing	RoW	0	Bovine Meat	Green water	(1,000 m³)
NH Foods	Grazing	Russian Federation	0	Bovine Meat	Green water	(1,000 m³)
NH Foods	Grazing	South Asia	16	Bovine Meat	Green water	(1,000 m³)
NH Foods	Grazing	Sub-Saharan Africa	0	Bovine Meat	Green water	(1,000 m³)
NH Foods	Grazing	Western Europe	27	Bovine Meat	Green water	(1,000 m³)
NH Foods	Croplands	East Asia and Southeast Asia	20066	Bovine Meat	Green water	(1,000 m³)
NH Foods	Croplands	Eastern Europe	507	Bovine Meat	Green water	(1,000 m³)
NH Foods	Croplands	Latin America and the Caribbean	22325	Bovine Meat	Green water	(1,000 m³)
NH Foods	Croplands	Near East and North Africa	77	Bovine Meat	Green water	(1,000 m³)
NH Foods	Croplands	North America	2365	Bovine Meat	Green water	(1,000 m³)
NH Foods	Croplands	Oceania	163230	Bovine Meat	Green water	(1,000 m³)
NH Foods	Croplands	RoW	0	Bovine Meat	Green water	(1,000 m³)
NH Foods	Croplands	Russian Federation	113	Bovine Meat	Green water	(1,000 m³)
NH Foods	Croplands	South Asia	820	Bovine Meat	Green water	(1,000 m³)
NH Foods	Croplands	Sub-Saharan Africa	106	Bovine Meat	Green water	(1,000 m³)
NH Foods	Croplands	Western Europe	368	Bovine Meat	Green water	(1,000 m³)
Teys	Grazing	East Asia and Southeast Asia	17	Bovine Meat	Green water	(1,000 m³)
Teys	Grazing	Eastern Europe	3	Bovine Meat	Green water	(1,000 m³)
Teys	Grazing	Latin America and the Caribbean	16	Bovine Meat	Green water	(1,000 m³)
Teys	Grazing	Near East and North Africa	5	Bovine Meat	Green water	(1,000 m³)
Teys	Grazing	North America	22	Bovine Meat	Green water	(1,000 m³)
Teys	Grazing	Oceania	2859805	Bovine Meat	Green water	(1,000 m³)
Teys	Grazing	RoW	0	Bovine Meat	Green water	(1,000 m³)
Teys	Grazing	Russian Federation	0	Bovine Meat	Green water	(1,000 m³)
Teys	Grazing	South Asia	36	Bovine Meat	Green water	(1,000 m³)
Teys	Grazing	Sub-Saharan Africa	0	Bovine Meat	Green water	(1,000 m³)
Teys	Grazing	Western Europe	61	Bovine Meat	Green water	(1,000 m³)
Teys	Croplands	East Asia and Southeast Asia	44675	Bovine Meat	Green water	(1,000 m³)
Teys	Croplands	Eastern Europe	1129	Bovine Meat	Green water	(1,000 m³)
Teys	Croplands	Latin America and the Caribbean	49706	Bovine Meat	Green water	(1,000 m³)
Teys	Croplands	Near East and North Africa	171	Bovine Meat	Green water	(1,000 m³)
Teys	Croplands	North America	5265	Bovine Meat	Green water	(1,000 m³)
Teys	Croplands	Oceania	363424	Bovine Meat	Green water	(1,000 m³)
Teys	Croplands	RoW	0	Bovine Meat	Green water	(1,000 m³)
Teys	Croplands	Russian Federation	251	Bovine Meat	Green water	(1,000 m³)
Teys	Croplands	South Asia	1827	Bovine Meat	Green water	(1,000 m³)
Teys	Croplands	Sub-Saharan Africa	236	Bovine Meat	Green water	(1,000 m³)
Teys	Croplands	Western Europe	818	Bovine Meat	Green water	(1,000 m³)
Tönnies Group	Grazing	East Asia and Southeast Asia	19	Bovine Meat	Green water	(1,000 m³)
Tönnies Group	Grazing	Eastern Europe	2736	Bovine Meat	Green water	(1,000 m³)
Tönnies Group	Grazing	Latin America and the Caribbean	116	Bovine Meat	Green water	(1,000 m³)
Tönnies Group	Grazing	Near East and North Africa	6	Bovine Meat	Green water	(1,000 m³)
Tönnies Group	Grazing	North America	58	Bovine Meat	Green water	(1,000 m³)
Tönnies Group	Grazing	Oceania	22	Bovine Meat	Green water	(1,000 m³)
Tönnies Group	Grazing	RoW	0	Bovine Meat	Green water	(1,000 m³)
Tönnies Group	Grazing	Russian Federation	0	Bovine Meat	Green water	(1,000 m³)
Tönnies Group	Grazing	South Asia	21	Bovine Meat	Green water	(1,000 m³)
Tönnies Group	Grazing	Sub-Saharan Africa	47	Bovine Meat	Green water	(1,000 m³)
Tönnies Group	Grazing	Western Europe	288541	Bovine Meat	Green water	(1,000 m³)
Tönnies Group	Croplands	East Asia and Southeast Asia	7182	Bovine Meat	Green water	(1,000 m³)
Tönnies Group	Croplands	Eastern Europe	51621	Bovine Meat	Green water	(1,000 m³)
Tönnies Group	Croplands	Latin America and the Caribbean	49903	Bovine Meat	Green water	(1,000 m³)
Tönnies Group	Croplands	Near East and North Africa	1854	Bovine Meat	Green water	(1,000 m³)
Tönnies Group	Croplands	North America	18079	Bovine Meat	Green water	(1,000 m³)
Tönnies Group	Croplands	Oceania	1415	Bovine Meat	Green water	(1,000 m³)
Tönnies Group	Croplands	RoW	0	Bovine Meat	Green water	(1,000 m³)
Tönnies Group	Croplands	Russian Federation	7545	Bovine Meat	Green water	(1,000 m³)
Tönnies Group	Croplands	South Asia	2723	Bovine Meat	Green water	(1,000 m³)
Tönnies Group	Croplands	Sub-Saharan Africa	1508	Bovine Meat	Green water	(1,000 m³)
Tönnies Group	Croplands	Western Europe	415054	Bovine Meat	Green water	(1,000 m³)
Tyson	Grazing	East Asia and Southeast Asia	2585	Bovine Meat	Green water	(1,000 m³)
Tyson	Grazing	Eastern Europe	57	Bovine Meat	Green water	(1,000 m³)
Tyson	Grazing	Latin America and the Caribbean	538076	Bovine Meat	Green water	(1,000 m³)
Tyson	Grazing	Near East and North Africa	59	Bovine Meat	Green water	(1,000 m³)
Tyson	Grazing	North America	19805456	Bovine Meat	Green water	(1,000 m³)
Tyson	Grazing	Oceania	1738767	Bovine Meat	Green water	(1,000 m³)
Tyson	Grazing	RoW	0	Bovine Meat	Green water	(1,000 m³)
Tyson	Grazing	Russian Federation	10	Bovine Meat	Green water	(1,000 m³)
Tyson	Grazing	South Asia	361	Bovine Meat	Green water	(1,000 m³)
Tyson	Grazing	Sub-Saharan Africa	667	Bovine Meat	Green water	(1,000 m³)
Tyson	Grazing	Western Europe	739	Bovine Meat	Green water	(1,000 m³)
Tyson	Croplands	East Asia and Southeast Asia	35199	Bovine Meat	Green water	(1,000 m³)
Tyson	Croplands	Eastern Europe	9496	Bovine Meat	Green water	(1,000 m³)
Tyson	Croplands	Latin America and the Caribbean	176598	Bovine Meat	Green water	(1,000 m³)
Tyson	Croplands	Near East and North Africa	1654	Bovine Meat	Green water	(1,000 m³)
Tyson	Croplands	North America	13140899	Bovine Meat	Green water	(1,000 m³)
Tyson	Croplands	Oceania	222234	Bovine Meat	Green water	(1,000 m³)
Tyson	Croplands	RoW	97	Bovine Meat	Green water	(1,000 m³)
Tyson	Croplands	Russian Federation	2279	Bovine Meat	Green water	(1,000 m³)
Tyson	Croplands	South Asia	25900	Bovine Meat	Green water	(1,000 m³)
Tyson	Croplands	Sub-Saharan Africa	3635	Bovine Meat	Green water	(1,000 m³)
Tyson	Croplands	Western Europe	8361	Bovine Meat	Green water	(1,000 m³)
Vion Food Group	Grazing	East Asia and Southeast Asia	48	Bovine Meat	Green water	(1,000 m³)
Vion Food Group	Grazing	Eastern Europe	6839	Bovine Meat	Green water	(1,000 m³)
Vion Food Group	Grazing	Latin America and the Caribbean	290	Bovine Meat	Green water	(1,000 m³)
Vion Food Group	Grazing	Near East and North Africa	14	Bovine Meat	Green water	(1,000 m³)
Vion Food Group	Grazing	North America	145	Bovine Meat	Green water	(1,000 m³)
Vion Food Group	Grazing	Oceania	55	Bovine Meat	Green water	(1,000 m³)
Vion Food Group	Grazing	RoW	0	Bovine Meat	Green water	(1,000 m³)
Vion Food Group	Grazing	Russian Federation	2	Bovine Meat	Green water	(1,000 m³)
Vion Food Group	Grazing	South Asia	54	Bovine Meat	Green water	(1,000 m³)
Vion Food Group	Grazing	Sub-Saharan Africa	117	Bovine Meat	Green water	(1,000 m³)
Vion Food Group	Grazing	Western Europe	721354	Bovine Meat	Green water	(1,000 m³)
Vion Food Group	Croplands	East Asia and Southeast Asia	17954	Bovine Meat	Green water	(1,000 m³)
Vion Food Group	Croplands	Eastern Europe	129052	Bovine Meat	Green water	(1,000 m³)
Vion Food Group	Croplands	Latin America and the Caribbean	124757	Bovine Meat	Green water	(1,000 m³)
Vion Food Group	Croplands	Near East and North Africa	4634	Bovine Meat	Green water	(1,000 m³)
Vion Food Group	Croplands	North America	45199	Bovine Meat	Green water	(1,000 m³)
Vion Food Group	Croplands	Oceania	3538	Bovine Meat	Green water	(1,000 m³)
Vion Food Group	Croplands	RoW	0	Bovine Meat	Green water	(1,000 m³)
Vion Food Group	Croplands	Russian Federation	18863	Bovine Meat	Green water	(1,000 m³)
Vion Food Group	Croplands	South Asia	6807	Bovine Meat	Green water	(1,000 m³)
Vion Food Group	Croplands	Sub-Saharan Africa	3770	Bovine Meat	Green water	(1,000 m³)
Vion Food Group	Croplands	Western Europe	1037636	Bovine Meat	Green water	(1,000 m³)
Westfleisch	Grazing	East Asia and Southeast Asia	20	Bovine Meat	Green water	(1,000 m³)
Westfleisch	Grazing	Eastern Europe	2862	Bovine Meat	Green water	(1,000 m³)
Westfleisch	Grazing	Latin America and the Caribbean	121	Bovine Meat	Green water	(1,000 m³)
Westfleisch	Grazing	Near East and North Africa	6	Bovine Meat	Green water	(1,000 m³)
Westfleisch	Grazing	North America	61	Bovine Meat	Green water	(1,000 m³)
Westfleisch	Grazing	Oceania	23	Bovine Meat	Green water	(1,000 m³)
Westfleisch	Grazing	RoW	0	Bovine Meat	Green water	(1,000 m³)
Westfleisch	Grazing	Russian Federation	0	Bovine Meat	Green water	(1,000 m³)
Westfleisch	Grazing	South Asia	22	Bovine Meat	Green water	(1,000 m³)
Westfleisch	Grazing	Sub-Saharan Africa	49	Bovine Meat	Green water	(1,000 m³)
Westfleisch	Grazing	Western Europe	301859	Bovine Meat	Green water	(1,000 m³)
Westfleisch	Croplands	East Asia and Southeast Asia	7513	Bovine Meat	Green water	(1,000 m³)
Westfleisch	Croplands	Eastern Europe	54003	Bovine Meat	Green water	(1,000 m³)
Westfleisch	Croplands	Latin America and the Caribbean	52206	Bovine Meat	Green water	(1,000 m³)
Westfleisch	Croplands	Near East and North Africa	1939	Bovine Meat	Green water	(1,000 m³)
Westfleisch	Croplands	North America	18914	Bovine Meat	Green water	(1,000 m³)
Westfleisch	Croplands	Oceania	1481	Bovine Meat	Green water	(1,000 m³)
Westfleisch	Croplands	RoW	0	Bovine Meat	Green water	(1,000 m³)
Westfleisch	Croplands	Russian Federation	7893	Bovine Meat	Green water	(1,000 m³)
Westfleisch	Croplands	South Asia	2848	Bovine Meat	Green water	(1,000 m³)
Westfleisch	Croplands	Sub-Saharan Africa	1578	Bovine Meat	Green water	(1,000 m³)
Westfleisch	Croplands	Western Europe	434211	Bovine Meat	Green water	(1,000 m³)
Bigard	Grazing	East Asia and Southeast Asia	0	Bovine Meat	Nitrogen application	(t)
Bigard	Grazing	Eastern Europe	47	Bovine Meat	Nitrogen application	(t)
Bigard	Grazing	Latin America and the Caribbean	0	Bovine Meat	Nitrogen application	(t)
Bigard	Grazing	Near East and North Africa	0	Bovine Meat	Nitrogen application	(t)
Bigard	Grazing	North America	1	Bovine Meat	Nitrogen application	(t)
Bigard	Grazing	Oceania	0	Bovine Meat	Nitrogen application	(t)
Bigard	Grazing	RoW	0	Bovine Meat	Nitrogen application	(t)
Bigard	Grazing	Russian Federation	0	Bovine Meat	Nitrogen application	(t)
Bigard	Grazing	South Asia	0	Bovine Meat	Nitrogen application	(t)
Bigard	Grazing	Sub-Saharan Africa	0	Bovine Meat	Nitrogen application	(t)
Bigard	Grazing	Western Europe	62605	Bovine Meat	Nitrogen application	(t)
Bigard	Croplands	East Asia and Southeast Asia	217	Bovine Meat	Nitrogen application	(t)
Bigard	Croplands	Eastern Europe	2559	Bovine Meat	Nitrogen application	(t)
Bigard	Croplands	Latin America and the Caribbean	470	Bovine Meat	Nitrogen application	(t)
Bigard	Croplands	Near East and North Africa	47	Bovine Meat	Nitrogen application	(t)
Bigard	Croplands	North America	922	Bovine Meat	Nitrogen application	(t)
Bigard	Croplands	Oceania	43	Bovine Meat	Nitrogen application	(t)
Bigard	Croplands	RoW	0	Bovine Meat	Nitrogen application	(t)
Bigard	Croplands	Russian Federation	52	Bovine Meat	Nitrogen application	(t)
Bigard	Croplands	South Asia	149	Bovine Meat	Nitrogen application	(t)
Bigard	Croplands	Sub-Saharan Africa	16	Bovine Meat	Nitrogen application	(t)
Bigard	Croplands	Western Europe	29455	Bovine Meat	Nitrogen application	(t)
Cargill	Grazing	East Asia and Southeast Asia	2	Bovine Meat	Nitrogen application	(t)
Cargill	Grazing	Eastern Europe	0	Bovine Meat	Nitrogen application	(t)
Cargill	Grazing	Latin America and the Caribbean	17	Bovine Meat	Nitrogen application	(t)
Cargill	Grazing	Near East and North Africa	1	Bovine Meat	Nitrogen application	(t)
Cargill	Grazing	North America	94529	Bovine Meat	Nitrogen application	(t)
Cargill	Grazing	Oceania	2637	Bovine Meat	Nitrogen application	(t)
Cargill	Grazing	RoW	0	Bovine Meat	Nitrogen application	(t)
Cargill	Grazing	Russian Federation	0	Bovine Meat	Nitrogen application	(t)
Cargill	Grazing	South Asia	0	Bovine Meat	Nitrogen application	(t)
Cargill	Grazing	Sub-Saharan Africa	0	Bovine Meat	Nitrogen application	(t)
Cargill	Grazing	Western Europe	36	Bovine Meat	Nitrogen application	(t)
Cargill	Croplands	East Asia and Southeast Asia	318	Bovine Meat	Nitrogen application	(t)
Cargill	Croplands	Eastern Europe	108	Bovine Meat	Nitrogen application	(t)
Cargill	Croplands	Latin America and the Caribbean	1593	Bovine Meat	Nitrogen application	(t)
Cargill	Croplands	Near East and North Africa	27	Bovine Meat	Nitrogen application	(t)
Cargill	Croplands	North America	244619	Bovine Meat	Nitrogen application	(t)
Cargill	Croplands	Oceania	5825	Bovine Meat	Nitrogen application	(t)
Cargill	Croplands	RoW	0	Bovine Meat	Nitrogen application	(t)
Cargill	Croplands	Russian Federation	6	Bovine Meat	Nitrogen application	(t)
Cargill	Croplands	South Asia	323	Bovine Meat	Nitrogen application	(t)
Cargill	Croplands	Sub-Saharan Africa	8	Bovine Meat	Nitrogen application	(t)
Cargill	Croplands	Western Europe	271	Bovine Meat	Nitrogen application	(t)
Danish Crown	Grazing	East Asia and Southeast Asia	0	Bovine Meat	Nitrogen application	(t)
Danish Crown	Grazing	Eastern Europe	19	Bovine Meat	Nitrogen application	(t)
Danish Crown	Grazing	Latin America and the Caribbean	0	Bovine Meat	Nitrogen application	(t)
Danish Crown	Grazing	Near East and North Africa	0	Bovine Meat	Nitrogen application	(t)
Danish Crown	Grazing	North America	0	Bovine Meat	Nitrogen application	(t)
Danish Crown	Grazing	Oceania	0	Bovine Meat	Nitrogen application	(t)
Danish Crown	Grazing	RoW	0	Bovine Meat	Nitrogen application	(t)
Danish Crown	Grazing	Russian Federation	0	Bovine Meat	Nitrogen application	(t)
Danish Crown	Grazing	South Asia	0	Bovine Meat	Nitrogen application	(t)
Danish Crown	Grazing	Sub-Saharan Africa	0	Bovine Meat	Nitrogen application	(t)
Danish Crown	Grazing	Western Europe	25935	Bovine Meat	Nitrogen application	(t)
Danish Crown	Croplands	East Asia and Southeast Asia	90	Bovine Meat	Nitrogen application	(t)
Danish Crown	Croplands	Eastern Europe	1060	Bovine Meat	Nitrogen application	(t)
Danish Crown	Croplands	Latin America and the Caribbean	195	Bovine Meat	Nitrogen application	(t)
Danish Crown	Croplands	Near East and North Africa	20	Bovine Meat	Nitrogen application	(t)
Danish Crown	Croplands	North America	382	Bovine Meat	Nitrogen application	(t)
Danish Crown	Croplands	Oceania	18	Bovine Meat	Nitrogen application	(t)
Danish Crown	Croplands	RoW	0	Bovine Meat	Nitrogen application	(t)
Danish Crown	Croplands	Russian Federation	21	Bovine Meat	Nitrogen application	(t)
Danish Crown	Croplands	South Asia	62	Bovine Meat	Nitrogen application	(t)
Danish Crown	Croplands	Sub-Saharan Africa	7	Bovine Meat	Nitrogen application	(t)
Danish Crown	Croplands	Western Europe	12202	Bovine Meat	Nitrogen application	(t)
Gruppo Cremonini	Grazing	East Asia and Southeast Asia	0	Bovine Meat	Nitrogen application	(t)
Gruppo Cremonini	Grazing	Eastern Europe	45	Bovine Meat	Nitrogen application	(t)
Gruppo Cremonini	Grazing	Latin America and the Caribbean	0	Bovine Meat	Nitrogen application	(t)
Gruppo Cremonini	Grazing	Near East and North Africa	0	Bovine Meat	Nitrogen application	(t)
Gruppo Cremonini	Grazing	North America	1	Bovine Meat	Nitrogen application	(t)
Gruppo Cremonini	Grazing	Oceania	0	Bovine Meat	Nitrogen application	(t)
Gruppo Cremonini	Grazing	RoW	0	Bovine Meat	Nitrogen application	(t)
Gruppo Cremonini	Grazing	Russian Federation	0	Bovine Meat	Nitrogen application	(t)
Gruppo Cremonini	Grazing	South Asia	0	Bovine Meat	Nitrogen application	(t)
Gruppo Cremonini	Grazing	Sub-Saharan Africa	0	Bovine Meat	Nitrogen application	(t)
Gruppo Cremonini	Grazing	Western Europe	60433	Bovine Meat	Nitrogen application	(t)
Gruppo Cremonini	Croplands	East Asia and Southeast Asia	210	Bovine Meat	Nitrogen application	(t)
Gruppo Cremonini	Croplands	Eastern Europe	2471	Bovine Meat	Nitrogen application	(t)
Gruppo Cremonini	Croplands	Latin America and the Caribbean	453	Bovine Meat	Nitrogen application	(t)
Gruppo Cremonini	Croplands	Near East and North Africa	46	Bovine Meat	Nitrogen application	(t)
Gruppo Cremonini	Croplands	North America	890	Bovine Meat	Nitrogen application	(t)
Gruppo Cremonini	Croplands	Oceania	42	Bovine Meat	Nitrogen application	(t)
Gruppo Cremonini	Croplands	RoW	0	Bovine Meat	Nitrogen application	(t)
Gruppo Cremonini	Croplands	Russian Federation	50	Bovine Meat	Nitrogen application	(t)
Gruppo Cremonini	Croplands	South Asia	144	Bovine Meat	Nitrogen application	(t)
Gruppo Cremonini	Croplands	Sub-Saharan Africa	16	Bovine Meat	Nitrogen application	(t)
Gruppo Cremonini	Croplands	Western Europe	28433	Bovine Meat	Nitrogen application	(t)
JBS	Grazing	East Asia and Southeast Asia	3	Bovine Meat	Nitrogen application	(t)
JBS	Grazing	Eastern Europe	1	Bovine Meat	Nitrogen application	(t)
JBS	Grazing	Latin America and the Caribbean	27718	Bovine Meat	Nitrogen application	(t)
JBS	Grazing	Near East and North Africa	3	Bovine Meat	Nitrogen application	(t)
JBS	Grazing	North America	121020	Bovine Meat	Nitrogen application	(t)
JBS	Grazing	Oceania	9262	Bovine Meat	Nitrogen application	(t)
JBS	Grazing	RoW	0	Bovine Meat	Nitrogen application	(t)
JBS	Grazing	Russian Federation	0	Bovine Meat	Nitrogen application	(t)
JBS	Grazing	South Asia	0	Bovine Meat	Nitrogen application	(t)
JBS	Grazing	Sub-Saharan Africa	0	Bovine Meat	Nitrogen application	(t)
JBS	Grazing	Western Europe	94	Bovine Meat	Nitrogen application	(t)
JBS	Croplands	East Asia and Southeast Asia	978	Bovine Meat	Nitrogen application	(t)
JBS	Croplands	Eastern Europe	226	Bovine Meat	Nitrogen application	(t)
JBS	Croplands	Latin America and the Caribbean	50549	Bovine Meat	Nitrogen application	(t)
JBS	Croplands	Near East and North Africa	68	Bovine Meat	Nitrogen application	(t)
JBS	Croplands	North America	320417	Bovine Meat	Nitrogen application	(t)
JBS	Croplands	Oceania	20431	Bovine Meat	Nitrogen application	(t)
JBS	Croplands	RoW	0	Bovine Meat	Nitrogen application	(t)
JBS	Croplands	Russian Federation	13	Bovine Meat	Nitrogen application	(t)
JBS	Croplands	South Asia	537	Bovine Meat	Nitrogen application	(t)
JBS	Croplands	Sub-Saharan Africa	26	Bovine Meat	Nitrogen application	(t)
JBS	Croplands	Western Europe	468	Bovine Meat	Nitrogen application	(t)
Marfrig	Grazing	East Asia and Southeast Asia	1	Bovine Meat	Nitrogen application	(t)
Marfrig	Grazing	Eastern Europe	0	Bovine Meat	Nitrogen application	(t)
Marfrig	Grazing	Latin America and the Caribbean	13962	Bovine Meat	Nitrogen application	(t)
Marfrig	Grazing	Near East and North Africa	1	Bovine Meat	Nitrogen application	(t)
Marfrig	Grazing	North America	48638	Bovine Meat	Nitrogen application	(t)
Marfrig	Grazing	Oceania	4	Bovine Meat	Nitrogen application	(t)
Marfrig	Grazing	RoW	0	Bovine Meat	Nitrogen application	(t)
Marfrig	Grazing	Russian Federation	0	Bovine Meat	Nitrogen application	(t)
Marfrig	Grazing	South Asia	0	Bovine Meat	Nitrogen application	(t)
Marfrig	Grazing	Sub-Saharan Africa	0	Bovine Meat	Nitrogen application	(t)
Marfrig	Grazing	Western Europe	38	Bovine Meat	Nitrogen application	(t)
Marfrig	Croplands	East Asia and Southeast Asia	92	Bovine Meat	Nitrogen application	(t)
Marfrig	Croplands	Eastern Europe	70	Bovine Meat	Nitrogen application	(t)
Marfrig	Croplands	Latin America and the Caribbean	25191	Bovine Meat	Nitrogen application	(t)
Marfrig	Croplands	Near East and North Africa	29	Bovine Meat	Nitrogen application	(t)
Marfrig	Croplands	North America	129412	Bovine Meat	Nitrogen application	(t)
Marfrig	Croplands	Oceania	17	Bovine Meat	Nitrogen application	(t)
Marfrig	Croplands	RoW	0	Bovine Meat	Nitrogen application	(t)
Marfrig	Croplands	Russian Federation	5	Bovine Meat	Nitrogen application	(t)
Marfrig	Croplands	South Asia	187	Bovine Meat	Nitrogen application	(t)
Marfrig	Croplands	Sub-Saharan Africa	11	Bovine Meat	Nitrogen application	(t)
Marfrig	Croplands	Western Europe	168	Bovine Meat	Nitrogen application	(t)
Minerva	Grazing	East Asia and Southeast Asia	0	Bovine Meat	Nitrogen application	(t)
Minerva	Grazing	Eastern Europe	0	Bovine Meat	Nitrogen application	(t)
Minerva	Grazing	Latin America and the Caribbean	11638	Bovine Meat	Nitrogen application	(t)
Minerva	Grazing	Near East and North Africa	0	Bovine Meat	Nitrogen application	(t)
Minerva	Grazing	North America	17	Bovine Meat	Nitrogen application	(t)
Minerva	Grazing	Oceania	0	Bovine Meat	Nitrogen application	(t)
Minerva	Grazing	RoW	0	Bovine Meat	Nitrogen application	(t)
Minerva	Grazing	Russian Federation	0	Bovine Meat	Nitrogen application	(t)
Minerva	Grazing	South Asia	0	Bovine Meat	Nitrogen application	(t)
Minerva	Grazing	Sub-Saharan Africa	0	Bovine Meat	Nitrogen application	(t)
Minerva	Grazing	Western Europe	18	Bovine Meat	Nitrogen application	(t)
Minerva	Croplands	East Asia and Southeast Asia	34	Bovine Meat	Nitrogen application	(t)
Minerva	Croplands	Eastern Europe	20	Bovine Meat	Nitrogen application	(t)
Minerva	Croplands	Latin America and the Caribbean	20346	Bovine Meat	Nitrogen application	(t)
Minerva	Croplands	Near East and North Africa	13	Bovine Meat	Nitrogen application	(t)
Minerva	Croplands	North America	3032	Bovine Meat	Nitrogen application	(t)
Minerva	Croplands	Oceania	2	Bovine Meat	Nitrogen application	(t)
Minerva	Croplands	RoW	0	Bovine Meat	Nitrogen application	(t)
Minerva	Croplands	Russian Federation	1	Bovine Meat	Nitrogen application	(t)
Minerva	Croplands	South Asia	28	Bovine Meat	Nitrogen application	(t)
Minerva	Croplands	Sub-Saharan Africa	6	Bovine Meat	Nitrogen application	(t)
Minerva	Croplands	Western Europe	33	Bovine Meat	Nitrogen application	(t)
NH Foods	Grazing	East Asia and Southeast Asia	0	Bovine Meat	Nitrogen application	(t)
NH Foods	Grazing	Eastern Europe	0	Bovine Meat	Nitrogen application	(t)
NH Foods	Grazing	Latin America and the Caribbean	0	Bovine Meat	Nitrogen application	(t)
NH Foods	Grazing	Near East and North Africa	0	Bovine Meat	Nitrogen application	(t)
NH Foods	Grazing	North America	0	Bovine Meat	Nitrogen application	(t)
NH Foods	Grazing	Oceania	1182	Bovine Meat	Nitrogen application	(t)
NH Foods	Grazing	RoW	0	Bovine Meat	Nitrogen application	(t)
NH Foods	Grazing	Russian Federation	0	Bovine Meat	Nitrogen application	(t)
NH Foods	Grazing	South Asia	0	Bovine Meat	Nitrogen application	(t)
NH Foods	Grazing	Sub-Saharan Africa	0	Bovine Meat	Nitrogen application	(t)
NH Foods	Grazing	Western Europe	1	Bovine Meat	Nitrogen application	(t)
NH Foods	Croplands	East Asia and Southeast Asia	98	Bovine Meat	Nitrogen application	(t)
NH Foods	Croplands	Eastern Europe	8	Bovine Meat	Nitrogen application	(t)
NH Foods	Croplands	Latin America and the Caribbean	19	Bovine Meat	Nitrogen application	(t)
NH Foods	Croplands	Near East and North Africa	0	Bovine Meat	Nitrogen application	(t)
NH Foods	Croplands	North America	28	Bovine Meat	Nitrogen application	(t)
NH Foods	Croplands	Oceania	2604	Bovine Meat	Nitrogen application	(t)
NH Foods	Croplands	RoW	0	Bovine Meat	Nitrogen application	(t)
NH Foods	Croplands	Russian Federation	0	Bovine Meat	Nitrogen application	(t)
NH Foods	Croplands	South Asia	11	Bovine Meat	Nitrogen application	(t)
NH Foods	Croplands	Sub-Saharan Africa	0	Bovine Meat	Nitrogen application	(t)
NH Foods	Croplands	Western Europe	9	Bovine Meat	Nitrogen application	(t)
Teys	Grazing	East Asia and Southeast Asia	0	Bovine Meat	Nitrogen application	(t)
Teys	Grazing	Eastern Europe	0	Bovine Meat	Nitrogen application	(t)
Teys	Grazing	Latin America and the Caribbean	0	Bovine Meat	Nitrogen application	(t)
Teys	Grazing	Near East and North Africa	0	Bovine Meat	Nitrogen application	(t)
Teys	Grazing	North America	0	Bovine Meat	Nitrogen application	(t)
Teys	Grazing	Oceania	2631	Bovine Meat	Nitrogen application	(t)
Teys	Grazing	RoW	0	Bovine Meat	Nitrogen application	(t)
Teys	Grazing	Russian Federation	0	Bovine Meat	Nitrogen application	(t)
Teys	Grazing	South Asia	0	Bovine Meat	Nitrogen application	(t)
Teys	Grazing	Sub-Saharan Africa	0	Bovine Meat	Nitrogen application	(t)
Teys	Grazing	Western Europe	3	Bovine Meat	Nitrogen application	(t)
Teys	Croplands	East Asia and Southeast Asia	219	Bovine Meat	Nitrogen application	(t)
Teys	Croplands	Eastern Europe	18	Bovine Meat	Nitrogen application	(t)
Teys	Croplands	Latin America and the Caribbean	41	Bovine Meat	Nitrogen application	(t)
Teys	Croplands	Near East and North Africa	1	Bovine Meat	Nitrogen application	(t)
Teys	Croplands	North America	62	Bovine Meat	Nitrogen application	(t)
Teys	Croplands	Oceania	5798	Bovine Meat	Nitrogen application	(t)
Teys	Croplands	RoW	0	Bovine Meat	Nitrogen application	(t)
Teys	Croplands	Russian Federation	0	Bovine Meat	Nitrogen application	(t)
Teys	Croplands	South Asia	25	Bovine Meat	Nitrogen application	(t)
Teys	Croplands	Sub-Saharan Africa	0	Bovine Meat	Nitrogen application	(t)
Teys	Croplands	Western Europe	20	Bovine Meat	Nitrogen application	(t)
Tönnies Group	Grazing	East Asia and Southeast Asia	0	Bovine Meat	Nitrogen application	(t)
Tönnies Group	Grazing	Eastern Europe	9	Bovine Meat	Nitrogen application	(t)
Tönnies Group	Grazing	Latin America and the Caribbean	0	Bovine Meat	Nitrogen application	(t)
Tönnies Group	Grazing	Near East and North Africa	0	Bovine Meat	Nitrogen application	(t)
Tönnies Group	Grazing	North America	0	Bovine Meat	Nitrogen application	(t)
Tönnies Group	Grazing	Oceania	0	Bovine Meat	Nitrogen application	(t)
Tönnies Group	Grazing	RoW	0	Bovine Meat	Nitrogen application	(t)
Tönnies Group	Grazing	Russian Federation	0	Bovine Meat	Nitrogen application	(t)
Tönnies Group	Grazing	South Asia	0	Bovine Meat	Nitrogen application	(t)
Tönnies Group	Grazing	Sub-Saharan Africa	0	Bovine Meat	Nitrogen application	(t)
Tönnies Group	Grazing	Western Europe	11800	Bovine Meat	Nitrogen application	(t)
Tönnies Group	Croplands	East Asia and Southeast Asia	41	Bovine Meat	Nitrogen application	(t)
Tönnies Group	Croplands	Eastern Europe	482	Bovine Meat	Nitrogen application	(t)
Tönnies Group	Croplands	Latin America and the Caribbean	89	Bovine Meat	Nitrogen application	(t)
Tönnies Group	Croplands	Near East and North Africa	9	Bovine Meat	Nitrogen application	(t)
Tönnies Group	Croplands	North America	174	Bovine Meat	Nitrogen application	(t)
Tönnies Group	Croplands	Oceania	8	Bovine Meat	Nitrogen application	(t)
Tönnies Group	Croplands	RoW	0	Bovine Meat	Nitrogen application	(t)
Tönnies Group	Croplands	Russian Federation	10	Bovine Meat	Nitrogen application	(t)
Tönnies Group	Croplands	South Asia	28	Bovine Meat	Nitrogen application	(t)
Tönnies Group	Croplands	Sub-Saharan Africa	3	Bovine Meat	Nitrogen application	(t)
Tönnies Group	Croplands	Western Europe	5552	Bovine Meat	Nitrogen application	(t)
Tyson	Grazing	East Asia and Southeast Asia	2	Bovine Meat	Nitrogen application	(t)
Tyson	Grazing	Eastern Europe	0	Bovine Meat	Nitrogen application	(t)
Tyson	Grazing	Latin America and the Caribbean	14	Bovine Meat	Nitrogen application	(t)
Tyson	Grazing	Near East and North Africa	0	Bovine Meat	Nitrogen application	(t)
Tyson	Grazing	North America	79845	Bovine Meat	Nitrogen application	(t)
Tyson	Grazing	Oceania	1600	Bovine Meat	Nitrogen application	(t)
Tyson	Grazing	RoW	0	Bovine Meat	Nitrogen application	(t)
Tyson	Grazing	Russian Federation	0	Bovine Meat	Nitrogen application	(t)
Tyson	Grazing	South Asia	0	Bovine Meat	Nitrogen application	(t)
Tyson	Grazing	Sub-Saharan Africa	0	Bovine Meat	Nitrogen application	(t)
Tyson	Grazing	Western Europe	30	Bovine Meat	Nitrogen application	(t)
Tyson	Croplands	East Asia and Southeast Asia	216	Bovine Meat	Nitrogen application	(t)
Tyson	Croplands	Eastern Europe	87	Bovine Meat	Nitrogen application	(t)
Tyson	Croplands	Latin America and the Caribbean	1336	Bovine Meat	Nitrogen application	(t)
Tyson	Croplands	Near East and North Africa	22	Bovine Meat	Nitrogen application	(t)
Tyson	Croplands	North America	206604	Bovine Meat	Nitrogen application	(t)
Tyson	Croplands	Oceania	3539	Bovine Meat	Nitrogen application	(t)
Tyson	Croplands	RoW	0	Bovine Meat	Nitrogen application	(t)
Tyson	Croplands	Russian Federation	5	Bovine Meat	Nitrogen application	(t)
Tyson	Croplands	South Asia	267	Bovine Meat	Nitrogen application	(t)
Tyson	Croplands	Sub-Saharan Africa	7	Bovine Meat	Nitrogen application	(t)
Tyson	Croplands	Western Europe	224	Bovine Meat	Nitrogen application	(t)
Vion Food Group	Grazing	East Asia and Southeast Asia	0	Bovine Meat	Nitrogen application	(t)
Vion Food Group	Grazing	Eastern Europe	22	Bovine Meat	Nitrogen application	(t)
Vion Food Group	Grazing	Latin America and the Caribbean	0	Bovine Meat	Nitrogen application	(t)
Vion Food Group	Grazing	Near East and North Africa	0	Bovine Meat	Nitrogen application	(t)
Vion Food Group	Grazing	North America	0	Bovine Meat	Nitrogen application	(t)
Vion Food Group	Grazing	Oceania	0	Bovine Meat	Nitrogen application	(t)
Vion Food Group	Grazing	RoW	0	Bovine Meat	Nitrogen application	(t)
Vion Food Group	Grazing	Russian Federation	0	Bovine Meat	Nitrogen application	(t)
Vion Food Group	Grazing	South Asia	0	Bovine Meat	Nitrogen application	(t)
Vion Food Group	Grazing	Sub-Saharan Africa	0	Bovine Meat	Nitrogen application	(t)
Vion Food Group	Grazing	Western Europe	29501	Bovine Meat	Nitrogen application	(t)
Vion Food Group	Croplands	East Asia and Southeast Asia	102	Bovine Meat	Nitrogen application	(t)
Vion Food Group	Croplands	Eastern Europe	1206	Bovine Meat	Nitrogen application	(t)
Vion Food Group	Croplands	Latin America and the Caribbean	221	Bovine Meat	Nitrogen application	(t)
Vion Food Group	Croplands	Near East and North Africa	22	Bovine Meat	Nitrogen application	(t)
Vion Food Group	Croplands	North America	434	Bovine Meat	Nitrogen application	(t)
Vion Food Group	Croplands	Oceania	20	Bovine Meat	Nitrogen application	(t)
Vion Food Group	Croplands	RoW	0	Bovine Meat	Nitrogen application	(t)
Vion Food Group	Croplands	Russian Federation	24	Bovine Meat	Nitrogen application	(t)
Vion Food Group	Croplands	South Asia	70	Bovine Meat	Nitrogen application	(t)
Vion Food Group	Croplands	Sub-Saharan Africa	8	Bovine Meat	Nitrogen application	(t)
Vion Food Group	Croplands	Western Europe	13880	Bovine Meat	Nitrogen application	(t)
Westfleisch	Grazing	East Asia and Southeast Asia	0	Bovine Meat	Nitrogen application	(t)
Westfleisch	Grazing	Eastern Europe	9	Bovine Meat	Nitrogen application	(t)
Westfleisch	Grazing	Latin America and the Caribbean	0	Bovine Meat	Nitrogen application	(t)
Westfleisch	Grazing	Near East and North Africa	0	Bovine Meat	Nitrogen application	(t)
Westfleisch	Grazing	North America	0	Bovine Meat	Nitrogen application	(t)
Westfleisch	Grazing	Oceania	0	Bovine Meat	Nitrogen application	(t)
Westfleisch	Grazing	RoW	0	Bovine Meat	Nitrogen application	(t)
Westfleisch	Grazing	Russian Federation	0	Bovine Meat	Nitrogen application	(t)
Westfleisch	Grazing	South Asia	0	Bovine Meat	Nitrogen application	(t)
Westfleisch	Grazing	Sub-Saharan Africa	0	Bovine Meat	Nitrogen application	(t)
Westfleisch	Grazing	Western Europe	12345	Bovine Meat	Nitrogen application	(t)
Westfleisch	Croplands	East Asia and Southeast Asia	43	Bovine Meat	Nitrogen application	(t)
Westfleisch	Croplands	Eastern Europe	505	Bovine Meat	Nitrogen application	(t)
Westfleisch	Croplands	Latin America and the Caribbean	93	Bovine Meat	Nitrogen application	(t)
Westfleisch	Croplands	Near East and North Africa	9	Bovine Meat	Nitrogen application	(t)
Westfleisch	Croplands	North America	182	Bovine Meat	Nitrogen application	(t)
Westfleisch	Croplands	Oceania	9	Bovine Meat	Nitrogen application	(t)
Westfleisch	Croplands	RoW	0	Bovine Meat	Nitrogen application	(t)
Westfleisch	Croplands	Russian Federation	10	Bovine Meat	Nitrogen application	(t)
Westfleisch	Croplands	South Asia	29	Bovine Meat	Nitrogen application	(t)
Westfleisch	Croplands	Sub-Saharan Africa	3	Bovine Meat	Nitrogen application	(t)
Westfleisch	Croplands	Western Europe	5808	Bovine Meat	Nitrogen application	(t)
Arab Company for Livestock Development (ACOLID)	Grazing	East Asia and Southeast Asia	0	Poultry Meat	Land use	(kha)
Arab Company for Livestock Development (ACOLID)	Grazing	Eastern Europe	0	Poultry Meat	Land use	(kha)
Arab Company for Livestock Development (ACOLID)	Grazing	Latin America and the Caribbean	0	Poultry Meat	Land use	(kha)
Arab Company for Livestock Development (ACOLID)	Grazing	Near East and North Africa	113	Poultry Meat	Land use	(kha)
Arab Company for Livestock Development (ACOLID)	Grazing	North America	0	Poultry Meat	Land use	(kha)
Arab Company for Livestock Development (ACOLID)	Grazing	Oceania	0	Poultry Meat	Land use	(kha)
Arab Company for Livestock Development (ACOLID)	Grazing	RoW	0	Poultry Meat	Land use	(kha)
Arab Company for Livestock Development (ACOLID)	Grazing	Russian Federation	0	Poultry Meat	Land use	(kha)
Arab Company for Livestock Development (ACOLID)	Grazing	South Asia	0	Poultry Meat	Land use	(kha)
Arab Company for Livestock Development (ACOLID)	Grazing	Sub-Saharan Africa	0	Poultry Meat	Land use	(kha)
Arab Company for Livestock Development (ACOLID)	Grazing	Western Europe	0	Poultry Meat	Land use	(kha)
Arab Company for Livestock Development (ACOLID)	Croplands	East Asia and Southeast Asia	5	Poultry Meat	Land use	(kha)
Arab Company for Livestock Development (ACOLID)	Croplands	Eastern Europe	170	Poultry Meat	Land use	(kha)
Arab Company for Livestock Development (ACOLID)	Croplands	Latin America and the Caribbean	149	Poultry Meat	Land use	(kha)
Arab Company for Livestock Development (ACOLID)	Croplands	Near East and North Africa	508	Poultry Meat	Land use	(kha)
Arab Company for Livestock Development (ACOLID)	Croplands	North America	58	Poultry Meat	Land use	(kha)
Arab Company for Livestock Development (ACOLID)	Croplands	Oceania	21	Poultry Meat	Land use	(kha)
Arab Company for Livestock Development (ACOLID)	Croplands	RoW	0	Poultry Meat	Land use	(kha)
Arab Company for Livestock Development (ACOLID)	Croplands	Russian Federation	211	Poultry Meat	Land use	(kha)
Arab Company for Livestock Development (ACOLID)	Croplands	South Asia	7	Poultry Meat	Land use	(kha)
Arab Company for Livestock Development (ACOLID)	Croplands	Sub-Saharan Africa	3	Poultry Meat	Land use	(kha)
Arab Company for Livestock Development (ACOLID)	Croplands	Western Europe	42	Poultry Meat	Land use	(kha)
Aurora Alimentos	Grazing	East Asia and Southeast Asia	0	Poultry Meat	Land use	(kha)
Aurora Alimentos	Grazing	Eastern Europe	0	Poultry Meat	Land use	(kha)
Aurora Alimentos	Grazing	Latin America and the Caribbean	28	Poultry Meat	Land use	(kha)
Aurora Alimentos	Grazing	Near East and North Africa	0	Poultry Meat	Land use	(kha)
Aurora Alimentos	Grazing	North America	0	Poultry Meat	Land use	(kha)
Aurora Alimentos	Grazing	Oceania	0	Poultry Meat	Land use	(kha)
Aurora Alimentos	Grazing	RoW	0	Poultry Meat	Land use	(kha)
Aurora Alimentos	Grazing	Russian Federation	0	Poultry Meat	Land use	(kha)
Aurora Alimentos	Grazing	South Asia	0	Poultry Meat	Land use	(kha)
Aurora Alimentos	Grazing	Sub-Saharan Africa	0	Poultry Meat	Land use	(kha)
Aurora Alimentos	Grazing	Western Europe	0	Poultry Meat	Land use	(kha)
Aurora Alimentos	Croplands	East Asia and Southeast Asia	0	Poultry Meat	Land use	(kha)
Aurora Alimentos	Croplands	Eastern Europe	0	Poultry Meat	Land use	(kha)
Aurora Alimentos	Croplands	Latin America and the Caribbean	276	Poultry Meat	Land use	(kha)
Aurora Alimentos	Croplands	Near East and North Africa	0	Poultry Meat	Land use	(kha)
Aurora Alimentos	Croplands	North America	33	Poultry Meat	Land use	(kha)
Aurora Alimentos	Croplands	Oceania	0	Poultry Meat	Land use	(kha)
Aurora Alimentos	Croplands	RoW	0	Poultry Meat	Land use	(kha)
Aurora Alimentos	Croplands	Russian Federation	0	Poultry Meat	Land use	(kha)
Aurora Alimentos	Croplands	South Asia	0	Poultry Meat	Land use	(kha)
Aurora Alimentos	Croplands	Sub-Saharan Africa	0	Poultry Meat	Land use	(kha)
Aurora Alimentos	Croplands	Western Europe	0	Poultry Meat	Land use	(kha)
BRF	Grazing	East Asia and Southeast Asia	0	Poultry Meat	Land use	(kha)
BRF	Grazing	Eastern Europe	0	Poultry Meat	Land use	(kha)
BRF	Grazing	Latin America and the Caribbean	141	Poultry Meat	Land use	(kha)
BRF	Grazing	Near East and North Africa	0	Poultry Meat	Land use	(kha)
BRF	Grazing	North America	2	Poultry Meat	Land use	(kha)
BRF	Grazing	Oceania	0	Poultry Meat	Land use	(kha)
BRF	Grazing	RoW	0	Poultry Meat	Land use	(kha)
BRF	Grazing	Russian Federation	0	Poultry Meat	Land use	(kha)
BRF	Grazing	South Asia	0	Poultry Meat	Land use	(kha)
BRF	Grazing	Sub-Saharan Africa	0	Poultry Meat	Land use	(kha)
BRF	Grazing	Western Europe	0	Poultry Meat	Land use	(kha)
BRF	Croplands	East Asia and Southeast Asia	0	Poultry Meat	Land use	(kha)
BRF	Croplands	Eastern Europe	1	Poultry Meat	Land use	(kha)
BRF	Croplands	Latin America and the Caribbean	1385	Poultry Meat	Land use	(kha)
BRF	Croplands	Near East and North Africa	4	Poultry Meat	Land use	(kha)
BRF	Croplands	North America	167	Poultry Meat	Land use	(kha)
BRF	Croplands	Oceania	0	Poultry Meat	Land use	(kha)
BRF	Croplands	RoW	0	Poultry Meat	Land use	(kha)
BRF	Croplands	Russian Federation	4	Poultry Meat	Land use	(kha)
BRF	Croplands	South Asia	3	Poultry Meat	Land use	(kha)
BRF	Croplands	Sub-Saharan Africa	3	Poultry Meat	Land use	(kha)
BRF	Croplands	Western Europe	1	Poultry Meat	Land use	(kha)
Cargill	Grazing	East Asia and Southeast Asia	4	Poultry Meat	Land use	(kha)
Cargill	Grazing	Eastern Europe	0	Poultry Meat	Land use	(kha)
Cargill	Grazing	Latin America and the Caribbean	28	Poultry Meat	Land use	(kha)
Cargill	Grazing	Near East and North Africa	0	Poultry Meat	Land use	(kha)
Cargill	Grazing	North America	144	Poultry Meat	Land use	(kha)
Cargill	Grazing	Oceania	7	Poultry Meat	Land use	(kha)
Cargill	Grazing	RoW	0	Poultry Meat	Land use	(kha)
Cargill	Grazing	Russian Federation	0	Poultry Meat	Land use	(kha)
Cargill	Grazing	South Asia	0	Poultry Meat	Land use	(kha)
Cargill	Grazing	Sub-Saharan Africa	0	Poultry Meat	Land use	(kha)
Cargill	Grazing	Western Europe	8	Poultry Meat	Land use	(kha)
Cargill	Croplands	East Asia and Southeast Asia	58	Poultry Meat	Land use	(kha)
Cargill	Croplands	Eastern Europe	24	Poultry Meat	Land use	(kha)
Cargill	Croplands	Latin America and the Caribbean	276	Poultry Meat	Land use	(kha)
Cargill	Croplands	Near East and North Africa	2	Poultry Meat	Land use	(kha)
Cargill	Croplands	North America	430	Poultry Meat	Land use	(kha)
Cargill	Croplands	Oceania	4	Poultry Meat	Land use	(kha)
Cargill	Croplands	RoW	0	Poultry Meat	Land use	(kha)
Cargill	Croplands	Russian Federation	5	Poultry Meat	Land use	(kha)
Cargill	Croplands	South Asia	7	Poultry Meat	Land use	(kha)
Cargill	Croplands	Sub-Saharan Africa	2	Poultry Meat	Land use	(kha)
Cargill	Croplands	Western Europe	85	Poultry Meat	Land use	(kha)
Charoen Pokphand	Grazing	East Asia and Southeast Asia	13	Poultry Meat	Land use	(kha)
Charoen Pokphand	Grazing	Eastern Europe	2	Poultry Meat	Land use	(kha)
Charoen Pokphand	Grazing	Latin America and the Caribbean	2	Poultry Meat	Land use	(kha)
Charoen Pokphand	Grazing	Near East and North Africa	0	Poultry Meat	Land use	(kha)
Charoen Pokphand	Grazing	North America	3	Poultry Meat	Land use	(kha)
Charoen Pokphand	Grazing	Oceania	13	Poultry Meat	Land use	(kha)
Charoen Pokphand	Grazing	RoW	0	Poultry Meat	Land use	(kha)
Charoen Pokphand	Grazing	Russian Federation	37	Poultry Meat	Land use	(kha)
Charoen Pokphand	Grazing	South Asia	0	Poultry Meat	Land use	(kha)
Charoen Pokphand	Grazing	Sub-Saharan Africa	2	Poultry Meat	Land use	(kha)
Charoen Pokphand	Grazing	Western Europe	4	Poultry Meat	Land use	(kha)
Charoen Pokphand	Croplands	East Asia and Southeast Asia	214	Poultry Meat	Land use	(kha)
Charoen Pokphand	Croplands	Eastern Europe	11	Poultry Meat	Land use	(kha)
Charoen Pokphand	Croplands	Latin America and the Caribbean	118	Poultry Meat	Land use	(kha)
Charoen Pokphand	Croplands	Near East and North Africa	3	Poultry Meat	Land use	(kha)
Charoen Pokphand	Croplands	North America	60	Poultry Meat	Land use	(kha)
Charoen Pokphand	Croplands	Oceania	11	Poultry Meat	Land use	(kha)
Charoen Pokphand	Croplands	RoW	0	Poultry Meat	Land use	(kha)
Charoen Pokphand	Croplands	Russian Federation	108	Poultry Meat	Land use	(kha)
Charoen Pokphand	Croplands	South Asia	7	Poultry Meat	Land use	(kha)
Charoen Pokphand	Croplands	Sub-Saharan Africa	2	Poultry Meat	Land use	(kha)
Charoen Pokphand	Croplands	Western Europe	3	Poultry Meat	Land use	(kha)
Continental Grain Company	Grazing	East Asia and Southeast Asia	0	Poultry Meat	Land use	(kha)
Continental Grain Company	Grazing	Eastern Europe	0	Poultry Meat	Land use	(kha)
Continental Grain Company	Grazing	Latin America and the Caribbean	5	Poultry Meat	Land use	(kha)
Continental Grain Company	Grazing	Near East and North Africa	0	Poultry Meat	Land use	(kha)
Continental Grain Company	Grazing	North America	142	Poultry Meat	Land use	(kha)
Continental Grain Company	Grazing	Oceania	3	Poultry Meat	Land use	(kha)
Continental Grain Company	Grazing	RoW	0	Poultry Meat	Land use	(kha)
Continental Grain Company	Grazing	Russian Federation	0	Poultry Meat	Land use	(kha)
Continental Grain Company	Grazing	South Asia	0	Poultry Meat	Land use	(kha)
Continental Grain Company	Grazing	Sub-Saharan Africa	0	Poultry Meat	Land use	(kha)
Continental Grain Company	Grazing	Western Europe	0	Poultry Meat	Land use	(kha)
Continental Grain Company	Croplands	East Asia and Southeast Asia	0	Poultry Meat	Land use	(kha)
Continental Grain Company	Croplands	Eastern Europe	0	Poultry Meat	Land use	(kha)
Continental Grain Company	Croplands	Latin America and the Caribbean	2	Poultry Meat	Land use	(kha)
Continental Grain Company	Croplands	Near East and North Africa	0	Poultry Meat	Land use	(kha)
Continental Grain Company	Croplands	North America	380	Poultry Meat	Land use	(kha)
Continental Grain Company	Croplands	Oceania	0	Poultry Meat	Land use	(kha)
Continental Grain Company	Croplands	RoW	0	Poultry Meat	Land use	(kha)
Continental Grain Company	Croplands	Russian Federation	0	Poultry Meat	Land use	(kha)
Continental Grain Company	Croplands	South Asia	4	Poultry Meat	Land use	(kha)
Continental Grain Company	Croplands	Sub-Saharan Africa	0	Poultry Meat	Land use	(kha)
Continental Grain Company	Croplands	Western Europe	0	Poultry Meat	Land use	(kha)
Fuijan Sunner Development	Grazing	East Asia and Southeast Asia	13	Poultry Meat	Land use	(kha)
Fuijan Sunner Development	Grazing	Eastern Europe	1	Poultry Meat	Land use	(kha)
Fuijan Sunner Development	Grazing	Latin America and the Caribbean	1	Poultry Meat	Land use	(kha)
Fuijan Sunner Development	Grazing	Near East and North Africa	0	Poultry Meat	Land use	(kha)
Fuijan Sunner Development	Grazing	North America	3	Poultry Meat	Land use	(kha)
Fuijan Sunner Development	Grazing	Oceania	13	Poultry Meat	Land use	(kha)
Fuijan Sunner Development	Grazing	RoW	0	Poultry Meat	Land use	(kha)
Fuijan Sunner Development	Grazing	Russian Federation	1	Poultry Meat	Land use	(kha)
Fuijan Sunner Development	Grazing	South Asia	0	Poultry Meat	Land use	(kha)
Fuijan Sunner Development	Grazing	Sub-Saharan Africa	2	Poultry Meat	Land use	(kha)
Fuijan Sunner Development	Grazing	Western Europe	4	Poultry Meat	Land use	(kha)
Fuijan Sunner Development	Croplands	East Asia and Southeast Asia	213	Poultry Meat	Land use	(kha)
Fuijan Sunner Development	Croplands	Eastern Europe	10	Poultry Meat	Land use	(kha)
Fuijan Sunner Development	Croplands	Latin America and the Caribbean	115	Poultry Meat	Land use	(kha)
Fuijan Sunner Development	Croplands	Near East and North Africa	2	Poultry Meat	Land use	(kha)
Fuijan Sunner Development	Croplands	North America	60	Poultry Meat	Land use	(kha)
Fuijan Sunner Development	Croplands	Oceania	11	Poultry Meat	Land use	(kha)
Fuijan Sunner Development	Croplands	RoW	0	Poultry Meat	Land use	(kha)
Fuijan Sunner Development	Croplands	Russian Federation	4	Poultry Meat	Land use	(kha)
Fuijan Sunner Development	Croplands	South Asia	7	Poultry Meat	Land use	(kha)
Fuijan Sunner Development	Croplands	Sub-Saharan Africa	2	Poultry Meat	Land use	(kha)
Fuijan Sunner Development	Croplands	Western Europe	3	Poultry Meat	Land use	(kha)
Industrias Bachoco	Grazing	East Asia and Southeast Asia	0	Poultry Meat	Land use	(kha)
Industrias Bachoco	Grazing	Eastern Europe	0	Poultry Meat	Land use	(kha)
Industrias Bachoco	Grazing	Latin America and the Caribbean	45	Poultry Meat	Land use	(kha)
Industrias Bachoco	Grazing	Near East and North Africa	0	Poultry Meat	Land use	(kha)
Industrias Bachoco	Grazing	North America	36	Poultry Meat	Land use	(kha)
Industrias Bachoco	Grazing	Oceania	1	Poultry Meat	Land use	(kha)
Industrias Bachoco	Grazing	RoW	0	Poultry Meat	Land use	(kha)
Industrias Bachoco	Grazing	Russian Federation	0	Poultry Meat	Land use	(kha)
Industrias Bachoco	Grazing	South Asia	0	Poultry Meat	Land use	(kha)
Industrias Bachoco	Grazing	Sub-Saharan Africa	0	Poultry Meat	Land use	(kha)
Industrias Bachoco	Grazing	Western Europe	0	Poultry Meat	Land use	(kha)
Industrias Bachoco	Croplands	East Asia and Southeast Asia	0	Poultry Meat	Land use	(kha)
Industrias Bachoco	Croplands	Eastern Europe	0	Poultry Meat	Land use	(kha)
Industrias Bachoco	Croplands	Latin America and the Caribbean	434	Poultry Meat	Land use	(kha)
Industrias Bachoco	Croplands	Near East and North Africa	1	Poultry Meat	Land use	(kha)
Industrias Bachoco	Croplands	North America	148	Poultry Meat	Land use	(kha)
Industrias Bachoco	Croplands	Oceania	0	Poultry Meat	Land use	(kha)
Industrias Bachoco	Croplands	RoW	0	Poultry Meat	Land use	(kha)
Industrias Bachoco	Croplands	Russian Federation	1	Poultry Meat	Land use	(kha)
Industrias Bachoco	Croplands	South Asia	2	Poultry Meat	Land use	(kha)
Industrias Bachoco	Croplands	Sub-Saharan Africa	0	Poultry Meat	Land use	(kha)
Industrias Bachoco	Croplands	Western Europe	0	Poultry Meat	Land use	(kha)
Japfa	Grazing	East Asia and Southeast Asia	19	Poultry Meat	Land use	(kha)
Japfa	Grazing	Eastern Europe	2	Poultry Meat	Land use	(kha)
Japfa	Grazing	Latin America and the Caribbean	2	Poultry Meat	Land use	(kha)
Japfa	Grazing	Near East and North Africa	0	Poultry Meat	Land use	(kha)
Japfa	Grazing	North America	4	Poultry Meat	Land use	(kha)
Japfa	Grazing	Oceania	19	Poultry Meat	Land use	(kha)
Japfa	Grazing	RoW	0	Poultry Meat	Land use	(kha)
Japfa	Grazing	Russian Federation	1	Poultry Meat	Land use	(kha)
Japfa	Grazing	South Asia	0	Poultry Meat	Land use	(kha)
Japfa	Grazing	Sub-Saharan Africa	3	Poultry Meat	Land use	(kha)
Japfa	Grazing	Western Europe	6	Poultry Meat	Land use	(kha)
Japfa	Croplands	East Asia and Southeast Asia	307	Poultry Meat	Land use	(kha)
Japfa	Croplands	Eastern Europe	14	Poultry Meat	Land use	(kha)
Japfa	Croplands	Latin America and the Caribbean	166	Poultry Meat	Land use	(kha)
Japfa	Croplands	Near East and North Africa	3	Poultry Meat	Land use	(kha)
Japfa	Croplands	North America	86	Poultry Meat	Land use	(kha)
Japfa	Croplands	Oceania	15	Poultry Meat	Land use	(kha)
Japfa	Croplands	RoW	0	Poultry Meat	Land use	(kha)
Japfa	Croplands	Russian Federation	6	Poultry Meat	Land use	(kha)
Japfa	Croplands	South Asia	10	Poultry Meat	Land use	(kha)
Japfa	Croplands	Sub-Saharan Africa	3	Poultry Meat	Land use	(kha)
Japfa	Croplands	Western Europe	4	Poultry Meat	Land use	(kha)
JBS	Grazing	East Asia and Southeast Asia	1	Poultry Meat	Land use	(kha)
JBS	Grazing	Eastern Europe	0	Poultry Meat	Land use	(kha)
JBS	Grazing	Latin America and the Caribbean	139	Poultry Meat	Land use	(kha)
JBS	Grazing	Near East and North Africa	0	Poultry Meat	Land use	(kha)
JBS	Grazing	North America	481	Poultry Meat	Land use	(kha)
JBS	Grazing	Oceania	12	Poultry Meat	Land use	(kha)
JBS	Grazing	RoW	0	Poultry Meat	Land use	(kha)
JBS	Grazing	Russian Federation	0	Poultry Meat	Land use	(kha)
JBS	Grazing	South Asia	0	Poultry Meat	Land use	(kha)
JBS	Grazing	Sub-Saharan Africa	0	Poultry Meat	Land use	(kha)
JBS	Grazing	Western Europe	18	Poultry Meat	Land use	(kha)
JBS	Croplands	East Asia and Southeast Asia	5	Poultry Meat	Land use	(kha)
JBS	Croplands	Eastern Europe	59	Poultry Meat	Land use	(kha)
JBS	Croplands	Latin America and the Caribbean	1252	Poultry Meat	Land use	(kha)
JBS	Croplands	Near East and North Africa	7	Poultry Meat	Land use	(kha)
JBS	Croplands	North America	1443	Poultry Meat	Land use	(kha)
JBS	Croplands	Oceania	3	Poultry Meat	Land use	(kha)
JBS	Croplands	RoW	0	Poultry Meat	Land use	(kha)
JBS	Croplands	Russian Federation	12	Poultry Meat	Land use	(kha)
JBS	Croplands	South Asia	19	Poultry Meat	Land use	(kha)
JBS	Croplands	Sub-Saharan Africa	4	Poultry Meat	Land use	(kha)
JBS	Croplands	Western Europe	233	Poultry Meat	Land use	(kha)
Koch Foods	Grazing	East Asia and Southeast Asia	0	Poultry Meat	Land use	(kha)
Koch Foods	Grazing	Eastern Europe	0	Poultry Meat	Land use	(kha)
Koch Foods	Grazing	Latin America and the Caribbean	6	Poultry Meat	Land use	(kha)
Koch Foods	Grazing	Near East and North Africa	0	Poultry Meat	Land use	(kha)
Koch Foods	Grazing	North America	178	Poultry Meat	Land use	(kha)
Koch Foods	Grazing	Oceania	4	Poultry Meat	Land use	(kha)
Koch Foods	Grazing	RoW	0	Poultry Meat	Land use	(kha)
Koch Foods	Grazing	Russian Federation	0	Poultry Meat	Land use	(kha)
Koch Foods	Grazing	South Asia	0	Poultry Meat	Land use	(kha)
Koch Foods	Grazing	Sub-Saharan Africa	0	Poultry Meat	Land use	(kha)
Koch Foods	Grazing	Western Europe	0	Poultry Meat	Land use	(kha)
Koch Foods	Croplands	East Asia and Southeast Asia	0	Poultry Meat	Land use	(kha)
Koch Foods	Croplands	Eastern Europe	0	Poultry Meat	Land use	(kha)
Koch Foods	Croplands	Latin America and the Caribbean	2	Poultry Meat	Land use	(kha)
Koch Foods	Croplands	Near East and North Africa	0	Poultry Meat	Land use	(kha)
Koch Foods	Croplands	North America	475	Poultry Meat	Land use	(kha)
Koch Foods	Croplands	Oceania	0	Poultry Meat	Land use	(kha)
Koch Foods	Croplands	RoW	0	Poultry Meat	Land use	(kha)
Koch Foods	Croplands	Russian Federation	0	Poultry Meat	Land use	(kha)
Koch Foods	Croplands	South Asia	5	Poultry Meat	Land use	(kha)
Koch Foods	Croplands	Sub-Saharan Africa	0	Poultry Meat	Land use	(kha)
Koch Foods	Croplands	Western Europe	0	Poultry Meat	Land use	(kha)
MHP	Grazing	East Asia and Southeast Asia	0	Poultry Meat	Land use	(kha)
MHP	Grazing	Eastern Europe	20	Poultry Meat	Land use	(kha)
MHP	Grazing	Latin America and the Caribbean	0	Poultry Meat	Land use	(kha)
MHP	Grazing	Near East and North Africa	0	Poultry Meat	Land use	(kha)
MHP	Grazing	North America	0	Poultry Meat	Land use	(kha)
MHP	Grazing	Oceania	0	Poultry Meat	Land use	(kha)
MHP	Grazing	RoW	0	Poultry Meat	Land use	(kha)
MHP	Grazing	Russian Federation	0	Poultry Meat	Land use	(kha)
MHP	Grazing	South Asia	0	Poultry Meat	Land use	(kha)
MHP	Grazing	Sub-Saharan Africa	0	Poultry Meat	Land use	(kha)
MHP	Grazing	Western Europe	0	Poultry Meat	Land use	(kha)
MHP	Croplands	East Asia and Southeast Asia	1	Poultry Meat	Land use	(kha)
MHP	Croplands	Eastern Europe	457	Poultry Meat	Land use	(kha)
MHP	Croplands	Latin America and the Caribbean	27	Poultry Meat	Land use	(kha)
MHP	Croplands	Near East and North Africa	1	Poultry Meat	Land use	(kha)
MHP	Croplands	North America	2	Poultry Meat	Land use	(kha)
MHP	Croplands	Oceania	0	Poultry Meat	Land use	(kha)
MHP	Croplands	RoW	0	Poultry Meat	Land use	(kha)
MHP	Croplands	Russian Federation	9	Poultry Meat	Land use	(kha)
MHP	Croplands	South Asia	0	Poultry Meat	Land use	(kha)
MHP	Croplands	Sub-Saharan Africa	0	Poultry Meat	Land use	(kha)
MHP	Croplands	Western Europe	13	Poultry Meat	Land use	(kha)
New Hope Group	Grazing	East Asia and Southeast Asia	13	Poultry Meat	Land use	(kha)
New Hope Group	Grazing	Eastern Europe	1	Poultry Meat	Land use	(kha)
New Hope Group	Grazing	Latin America and the Caribbean	1	Poultry Meat	Land use	(kha)
New Hope Group	Grazing	Near East and North Africa	0	Poultry Meat	Land use	(kha)
New Hope Group	Grazing	North America	3	Poultry Meat	Land use	(kha)
New Hope Group	Grazing	Oceania	13	Poultry Meat	Land use	(kha)
New Hope Group	Grazing	RoW	0	Poultry Meat	Land use	(kha)
New Hope Group	Grazing	Russian Federation	0	Poultry Meat	Land use	(kha)
New Hope Group	Grazing	South Asia	0	Poultry Meat	Land use	(kha)
New Hope Group	Grazing	Sub-Saharan Africa	2	Poultry Meat	Land use	(kha)
New Hope Group	Grazing	Western Europe	4	Poultry Meat	Land use	(kha)
New Hope Group	Croplands	East Asia and Southeast Asia	206	Poultry Meat	Land use	(kha)
New Hope Group	Croplands	Eastern Europe	10	Poultry Meat	Land use	(kha)
New Hope Group	Croplands	Latin America and the Caribbean	112	Poultry Meat	Land use	(kha)
New Hope Group	Croplands	Near East and North Africa	2	Poultry Meat	Land use	(kha)
New Hope Group	Croplands	North America	58	Poultry Meat	Land use	(kha)
New Hope Group	Croplands	Oceania	10	Poultry Meat	Land use	(kha)
New Hope Group	Croplands	RoW	0	Poultry Meat	Land use	(kha)
New Hope Group	Croplands	Russian Federation	4	Poultry Meat	Land use	(kha)
New Hope Group	Croplands	South Asia	7	Poultry Meat	Land use	(kha)
New Hope Group	Croplands	Sub-Saharan Africa	2	Poultry Meat	Land use	(kha)
New Hope Group	Croplands	Western Europe	3	Poultry Meat	Land use	(kha)
Perdue Farms	Grazing	East Asia and Southeast Asia	0	Poultry Meat	Land use	(kha)
Perdue Farms	Grazing	Eastern Europe	0	Poultry Meat	Land use	(kha)
Perdue Farms	Grazing	Latin America and the Caribbean	5	Poultry Meat	Land use	(kha)
Perdue Farms	Grazing	Near East and North Africa	0	Poultry Meat	Land use	(kha)
Perdue Farms	Grazing	North America	163	Poultry Meat	Land use	(kha)
Perdue Farms	Grazing	Oceania	4	Poultry Meat	Land use	(kha)
Perdue Farms	Grazing	RoW	0	Poultry Meat	Land use	(kha)
Perdue Farms	Grazing	Russian Federation	0	Poultry Meat	Land use	(kha)
Perdue Farms	Grazing	South Asia	0	Poultry Meat	Land use	(kha)
Perdue Farms	Grazing	Sub-Saharan Africa	0	Poultry Meat	Land use	(kha)
Perdue Farms	Grazing	Western Europe	0	Poultry Meat	Land use	(kha)
Perdue Farms	Croplands	East Asia and Southeast Asia	0	Poultry Meat	Land use	(kha)
Perdue Farms	Croplands	Eastern Europe	0	Poultry Meat	Land use	(kha)
Perdue Farms	Croplands	Latin America and the Caribbean	2	Poultry Meat	Land use	(kha)
Perdue Farms	Croplands	Near East and North Africa	0	Poultry Meat	Land use	(kha)
Perdue Farms	Croplands	North America	436	Poultry Meat	Land use	(kha)
Perdue Farms	Croplands	Oceania	0	Poultry Meat	Land use	(kha)
Perdue Farms	Croplands	RoW	0	Poultry Meat	Land use	(kha)
Perdue Farms	Croplands	Russian Federation	0	Poultry Meat	Land use	(kha)
Perdue Farms	Croplands	South Asia	5	Poultry Meat	Land use	(kha)
Perdue Farms	Croplands	Sub-Saharan Africa	0	Poultry Meat	Land use	(kha)
Perdue Farms	Croplands	Western Europe	0	Poultry Meat	Land use	(kha)
Tyson	Grazing	East Asia and Southeast Asia	5	Poultry Meat	Land use	(kha)
Tyson	Grazing	Eastern Europe	0	Poultry Meat	Land use	(kha)
Tyson	Grazing	Latin America and the Caribbean	15	Poultry Meat	Land use	(kha)
Tyson	Grazing	Near East and North Africa	0	Poultry Meat	Land use	(kha)
Tyson	Grazing	North America	461	Poultry Meat	Land use	(kha)
Tyson	Grazing	Oceania	15	Poultry Meat	Land use	(kha)
Tyson	Grazing	RoW	0	Poultry Meat	Land use	(kha)
Tyson	Grazing	Russian Federation	0	Poultry Meat	Land use	(kha)
Tyson	Grazing	South Asia	0	Poultry Meat	Land use	(kha)
Tyson	Grazing	Sub-Saharan Africa	0	Poultry Meat	Land use	(kha)
Tyson	Grazing	Western Europe	2	Poultry Meat	Land use	(kha)
Tyson	Croplands	East Asia and Southeast Asia	66	Poultry Meat	Land use	(kha)
Tyson	Croplands	Eastern Europe	5	Poultry Meat	Land use	(kha)
Tyson	Croplands	Latin America and the Caribbean	41	Poultry Meat	Land use	(kha)
Tyson	Croplands	Near East and North Africa	0	Poultry Meat	Land use	(kha)
Tyson	Croplands	North America	1248	Poultry Meat	Land use	(kha)
Tyson	Croplands	Oceania	4	Poultry Meat	Land use	(kha)
Tyson	Croplands	RoW	0	Poultry Meat	Land use	(kha)
Tyson	Croplands	Russian Federation	2	Poultry Meat	Land use	(kha)
Tyson	Croplands	South Asia	15	Poultry Meat	Land use	(kha)
Tyson	Croplands	Sub-Saharan Africa	1	Poultry Meat	Land use	(kha)
Tyson	Croplands	Western Europe	2	Poultry Meat	Land use	(kha)
Wellhope Agritech	Grazing	East Asia and Southeast Asia	15	Poultry Meat	Land use	(kha)
Wellhope Agritech	Grazing	Eastern Europe	2	Poultry Meat	Land use	(kha)
Wellhope Agritech	Grazing	Latin America and the Caribbean	2	Poultry Meat	Land use	(kha)
Wellhope Agritech	Grazing	Near East and North Africa	0	Poultry Meat	Land use	(kha)
Wellhope Agritech	Grazing	North America	4	Poultry Meat	Land use	(kha)
Wellhope Agritech	Grazing	Oceania	15	Poultry Meat	Land use	(kha)
Wellhope Agritech	Grazing	RoW	0	Poultry Meat	Land use	(kha)
Wellhope Agritech	Grazing	Russian Federation	1	Poultry Meat	Land use	(kha)
Wellhope Agritech	Grazing	South Asia	0	Poultry Meat	Land use	(kha)
Wellhope Agritech	Grazing	Sub-Saharan Africa	2	Poultry Meat	Land use	(kha)
Wellhope Agritech	Grazing	Western Europe	5	Poultry Meat	Land use	(kha)
Wellhope Agritech	Croplands	East Asia and Southeast Asia	253	Poultry Meat	Land use	(kha)
Wellhope Agritech	Croplands	Eastern Europe	12	Poultry Meat	Land use	(kha)
Wellhope Agritech	Croplands	Latin America and the Caribbean	137	Poultry Meat	Land use	(kha)
Wellhope Agritech	Croplands	Near East and North Africa	2	Poultry Meat	Land use	(kha)
Wellhope Agritech	Croplands	North America	71	Poultry Meat	Land use	(kha)
Wellhope Agritech	Croplands	Oceania	13	Poultry Meat	Land use	(kha)
Wellhope Agritech	Croplands	RoW	0	Poultry Meat	Land use	(kha)
Wellhope Agritech	Croplands	Russian Federation	5	Poultry Meat	Land use	(kha)
Wellhope Agritech	Croplands	South Asia	8	Poultry Meat	Land use	(kha)
Wellhope Agritech	Croplands	Sub-Saharan Africa	2	Poultry Meat	Land use	(kha)
Wellhope Agritech	Croplands	Western Europe	3	Poultry Meat	Land use	(kha)
Wen's Food Group	Grazing	East Asia and Southeast Asia	23	Poultry Meat	Land use	(kha)
Wen's Food Group	Grazing	Eastern Europe	3	Poultry Meat	Land use	(kha)
Wen's Food Group	Grazing	Latin America and the Caribbean	3	Poultry Meat	Land use	(kha)
Wen's Food Group	Grazing	Near East and North Africa	0	Poultry Meat	Land use	(kha)
Wen's Food Group	Grazing	North America	5	Poultry Meat	Land use	(kha)
Wen's Food Group	Grazing	Oceania	23	Poultry Meat	Land use	(kha)
Wen's Food Group	Grazing	RoW	0	Poultry Meat	Land use	(kha)
Wen's Food Group	Grazing	Russian Federation	2	Poultry Meat	Land use	(kha)
Wen's Food Group	Grazing	South Asia	0	Poultry Meat	Land use	(kha)
Wen's Food Group	Grazing	Sub-Saharan Africa	3	Poultry Meat	Land use	(kha)
Wen's Food Group	Grazing	Western Europe	8	Poultry Meat	Land use	(kha)
Wen's Food Group	Croplands	East Asia and Southeast Asia	370	Poultry Meat	Land use	(kha)
Wen's Food Group	Croplands	Eastern Europe	17	Poultry Meat	Land use	(kha)
Wen's Food Group	Croplands	Latin America and the Caribbean	201	Poultry Meat	Land use	(kha)
Wen's Food Group	Croplands	Near East and North Africa	4	Poultry Meat	Land use	(kha)
Wen's Food Group	Croplands	North America	104	Poultry Meat	Land use	(kha)
Wen's Food Group	Croplands	Oceania	18	Poultry Meat	Land use	(kha)
Wen's Food Group	Croplands	RoW	0	Poultry Meat	Land use	(kha)
Wen's Food Group	Croplands	Russian Federation	7	Poultry Meat	Land use	(kha)
Wen's Food Group	Croplands	South Asia	12	Poultry Meat	Land use	(kha)
Wen's Food Group	Croplands	Sub-Saharan Africa	3	Poultry Meat	Land use	(kha)
Wen's Food Group	Croplands	Western Europe	5	Poultry Meat	Land use	(kha)
WH Group	Grazing	East Asia and Southeast Asia	4	Poultry Meat	Land use	(kha)
WH Group	Grazing	Eastern Europe	5	Poultry Meat	Land use	(kha)
WH Group	Grazing	Latin America and the Caribbean	0	Poultry Meat	Land use	(kha)
WH Group	Grazing	Near East and North Africa	0	Poultry Meat	Land use	(kha)
WH Group	Grazing	North America	0	Poultry Meat	Land use	(kha)
WH Group	Grazing	Oceania	4	Poultry Meat	Land use	(kha)
WH Group	Grazing	RoW	0	Poultry Meat	Land use	(kha)
WH Group	Grazing	Russian Federation	0	Poultry Meat	Land use	(kha)
WH Group	Grazing	South Asia	0	Poultry Meat	Land use	(kha)
WH Group	Grazing	Sub-Saharan Africa	0	Poultry Meat	Land use	(kha)
WH Group	Grazing	Western Europe	2	Poultry Meat	Land use	(kha)
WH Group	Croplands	East Asia and Southeast Asia	66	Poultry Meat	Land use	(kha)
WH Group	Croplands	Eastern Europe	112	Poultry Meat	Land use	(kha)
WH Group	Croplands	Latin America and the Caribbean	42	Poultry Meat	Land use	(kha)
WH Group	Croplands	Near East and North Africa	0	Poultry Meat	Land use	(kha)
WH Group	Croplands	North America	19	Poultry Meat	Land use	(kha)
WH Group	Croplands	Oceania	3	Poultry Meat	Land use	(kha)
WH Group	Croplands	RoW	0	Poultry Meat	Land use	(kha)
WH Group	Croplands	Russian Federation	3	Poultry Meat	Land use	(kha)
WH Group	Croplands	South Asia	2	Poultry Meat	Land use	(kha)
WH Group	Croplands	Sub-Saharan Africa	0	Poultry Meat	Land use	(kha)
WH Group	Croplands	Western Europe	4	Poultry Meat	Land use	(kha)
Arab Company for Livestock Development (ACOLID)	Grazing	East Asia and Southeast Asia	0	Poultry Meat	Blue water	(1,000 m³)
Arab Company for Livestock Development (ACOLID)	Grazing	Eastern Europe	0	Poultry Meat	Blue water	(1,000 m³)
Arab Company for Livestock Development (ACOLID)	Grazing	Latin America and the Caribbean	0	Poultry Meat	Blue water	(1,000 m³)
Arab Company for Livestock Development (ACOLID)	Grazing	Near East and North Africa	0	Poultry Meat	Blue water	(1,000 m³)
Arab Company for Livestock Development (ACOLID)	Grazing	North America	0	Poultry Meat	Blue water	(1,000 m³)
Arab Company for Livestock Development (ACOLID)	Grazing	Oceania	0	Poultry Meat	Blue water	(1,000 m³)
Arab Company for Livestock Development (ACOLID)	Grazing	RoW	0	Poultry Meat	Blue water	(1,000 m³)
Arab Company for Livestock Development (ACOLID)	Grazing	Russian Federation	0	Poultry Meat	Blue water	(1,000 m³)
Arab Company for Livestock Development (ACOLID)	Grazing	South Asia	0	Poultry Meat	Blue water	(1,000 m³)
Arab Company for Livestock Development (ACOLID)	Grazing	Sub-Saharan Africa	0	Poultry Meat	Blue water	(1,000 m³)
Arab Company for Livestock Development (ACOLID)	Grazing	Western Europe	0	Poultry Meat	Blue water	(1,000 m³)
Arab Company for Livestock Development (ACOLID)	Croplands	East Asia and Southeast Asia	2065	Poultry Meat	Blue water	(1,000 m³)
Arab Company for Livestock Development (ACOLID)	Croplands	Eastern Europe	25816	Poultry Meat	Blue water	(1,000 m³)
Arab Company for Livestock Development (ACOLID)	Croplands	Latin America and the Caribbean	7562	Poultry Meat	Blue water	(1,000 m³)
Arab Company for Livestock Development (ACOLID)	Croplands	Near East and North Africa	1157095	Poultry Meat	Blue water	(1,000 m³)
Arab Company for Livestock Development (ACOLID)	Croplands	North America	18140	Poultry Meat	Blue water	(1,000 m³)
Arab Company for Livestock Development (ACOLID)	Croplands	Oceania	571	Poultry Meat	Blue water	(1,000 m³)
Arab Company for Livestock Development (ACOLID)	Croplands	RoW	11	Poultry Meat	Blue water	(1,000 m³)
Arab Company for Livestock Development (ACOLID)	Croplands	Russian Federation	37983	Poultry Meat	Blue water	(1,000 m³)
Arab Company for Livestock Development (ACOLID)	Croplands	South Asia	17748	Poultry Meat	Blue water	(1,000 m³)
Arab Company for Livestock Development (ACOLID)	Croplands	Sub-Saharan Africa	800	Poultry Meat	Blue water	(1,000 m³)
Arab Company for Livestock Development (ACOLID)	Croplands	Western Europe	5224	Poultry Meat	Blue water	(1,000 m³)
Aurora Alimentos	Grazing	East Asia and Southeast Asia	0	Poultry Meat	Blue water	(1,000 m³)
Aurora Alimentos	Grazing	Eastern Europe	0	Poultry Meat	Blue water	(1,000 m³)
Aurora Alimentos	Grazing	Latin America and the Caribbean	0	Poultry Meat	Blue water	(1,000 m³)
Aurora Alimentos	Grazing	Near East and North Africa	0	Poultry Meat	Blue water	(1,000 m³)
Aurora Alimentos	Grazing	North America	0	Poultry Meat	Blue water	(1,000 m³)
Aurora Alimentos	Grazing	Oceania	0	Poultry Meat	Blue water	(1,000 m³)
Aurora Alimentos	Grazing	RoW	0	Poultry Meat	Blue water	(1,000 m³)
Aurora Alimentos	Grazing	Russian Federation	0	Poultry Meat	Blue water	(1,000 m³)
Aurora Alimentos	Grazing	South Asia	0	Poultry Meat	Blue water	(1,000 m³)
Aurora Alimentos	Grazing	Sub-Saharan Africa	0	Poultry Meat	Blue water	(1,000 m³)
Aurora Alimentos	Grazing	Western Europe	0	Poultry Meat	Blue water	(1,000 m³)
Aurora Alimentos	Croplands	East Asia and Southeast Asia	90	Poultry Meat	Blue water	(1,000 m³)
Aurora Alimentos	Croplands	Eastern Europe	20	Poultry Meat	Blue water	(1,000 m³)
Aurora Alimentos	Croplands	Latin America and the Caribbean	54225	Poultry Meat	Blue water	(1,000 m³)
Aurora Alimentos	Croplands	Near East and North Africa	2143	Poultry Meat	Blue water	(1,000 m³)
Aurora Alimentos	Croplands	North America	14211	Poultry Meat	Blue water	(1,000 m³)
Aurora Alimentos	Croplands	Oceania	11	Poultry Meat	Blue water	(1,000 m³)
Aurora Alimentos	Croplands	RoW	0	Poultry Meat	Blue water	(1,000 m³)
Aurora Alimentos	Croplands	Russian Federation	96	Poultry Meat	Blue water	(1,000 m³)
Aurora Alimentos	Croplands	South Asia	312	Poultry Meat	Blue water	(1,000 m³)
Aurora Alimentos	Croplands	Sub-Saharan Africa	81	Poultry Meat	Blue water	(1,000 m³)
Aurora Alimentos	Croplands	Western Europe	86	Poultry Meat	Blue water	(1,000 m³)
BRF	Grazing	East Asia and Southeast Asia	0	Poultry Meat	Blue water	(1,000 m³)
BRF	Grazing	Eastern Europe	0	Poultry Meat	Blue water	(1,000 m³)
BRF	Grazing	Latin America and the Caribbean	0	Poultry Meat	Blue water	(1,000 m³)
BRF	Grazing	Near East and North Africa	0	Poultry Meat	Blue water	(1,000 m³)
BRF	Grazing	North America	0	Poultry Meat	Blue water	(1,000 m³)
BRF	Grazing	Oceania	0	Poultry Meat	Blue water	(1,000 m³)
BRF	Grazing	RoW	0	Poultry Meat	Blue water	(1,000 m³)
BRF	Grazing	Russian Federation	0	Poultry Meat	Blue water	(1,000 m³)
BRF	Grazing	South Asia	0	Poultry Meat	Blue water	(1,000 m³)
BRF	Grazing	Sub-Saharan Africa	0	Poultry Meat	Blue water	(1,000 m³)
BRF	Grazing	Western Europe	0	Poultry Meat	Blue water	(1,000 m³)
BRF	Croplands	East Asia and Southeast Asia	454	Poultry Meat	Blue water	(1,000 m³)
BRF	Croplands	Eastern Europe	100	Poultry Meat	Blue water	(1,000 m³)
BRF	Croplands	Latin America and the Caribbean	272503	Poultry Meat	Blue water	(1,000 m³)
BRF	Croplands	Near East and North Africa	10772	Poultry Meat	Blue water	(1,000 m³)
BRF	Croplands	North America	71416	Poultry Meat	Blue water	(1,000 m³)
BRF	Croplands	Oceania	55	Poultry Meat	Blue water	(1,000 m³)
BRF	Croplands	RoW	0	Poultry Meat	Blue water	(1,000 m³)
BRF	Croplands	Russian Federation	483	Poultry Meat	Blue water	(1,000 m³)
BRF	Croplands	South Asia	1569	Poultry Meat	Blue water	(1,000 m³)
BRF	Croplands	Sub-Saharan Africa	407	Poultry Meat	Blue water	(1,000 m³)
BRF	Croplands	Western Europe	433	Poultry Meat	Blue water	(1,000 m³)
Cargill	Grazing	East Asia and Southeast Asia	0	Poultry Meat	Blue water	(1,000 m³)
Cargill	Grazing	Eastern Europe	0	Poultry Meat	Blue water	(1,000 m³)
Cargill	Grazing	Latin America and the Caribbean	0	Poultry Meat	Blue water	(1,000 m³)
Cargill	Grazing	Near East and North Africa	0	Poultry Meat	Blue water	(1,000 m³)
Cargill	Grazing	North America	0	Poultry Meat	Blue water	(1,000 m³)
Cargill	Grazing	Oceania	0	Poultry Meat	Blue water	(1,000 m³)
Cargill	Grazing	RoW	0	Poultry Meat	Blue water	(1,000 m³)
Cargill	Grazing	Russian Federation	0	Poultry Meat	Blue water	(1,000 m³)
Cargill	Grazing	South Asia	0	Poultry Meat	Blue water	(1,000 m³)
Cargill	Grazing	Sub-Saharan Africa	0	Poultry Meat	Blue water	(1,000 m³)
Cargill	Grazing	Western Europe	0	Poultry Meat	Blue water	(1,000 m³)
Cargill	Croplands	East Asia and Southeast Asia	34847	Poultry Meat	Blue water	(1,000 m³)
Cargill	Croplands	Eastern Europe	3568	Poultry Meat	Blue water	(1,000 m³)
Cargill	Croplands	Latin America and the Caribbean	46830	Poultry Meat	Blue water	(1,000 m³)
Cargill	Croplands	Near East and North Africa	4233	Poultry Meat	Blue water	(1,000 m³)
Cargill	Croplands	North America	244861	Poultry Meat	Blue water	(1,000 m³)
Cargill	Croplands	Oceania	238	Poultry Meat	Blue water	(1,000 m³)
Cargill	Croplands	RoW	0	Poultry Meat	Blue water	(1,000 m³)
Cargill	Croplands	Russian Federation	1363	Poultry Meat	Blue water	(1,000 m³)
Cargill	Croplands	South Asia	4390	Poultry Meat	Blue water	(1,000 m³)
Cargill	Croplands	Sub-Saharan Africa	422	Poultry Meat	Blue water	(1,000 m³)
Cargill	Croplands	Western Europe	35208	Poultry Meat	Blue water	(1,000 m³)
Charoen Pokphand	Grazing	East Asia and Southeast Asia	0	Poultry Meat	Blue water	(1,000 m³)
Charoen Pokphand	Grazing	Eastern Europe	0	Poultry Meat	Blue water	(1,000 m³)
Charoen Pokphand	Grazing	Latin America and the Caribbean	0	Poultry Meat	Blue water	(1,000 m³)
Charoen Pokphand	Grazing	Near East and North Africa	0	Poultry Meat	Blue water	(1,000 m³)
Charoen Pokphand	Grazing	North America	0	Poultry Meat	Blue water	(1,000 m³)
Charoen Pokphand	Grazing	Oceania	0	Poultry Meat	Blue water	(1,000 m³)
Charoen Pokphand	Grazing	RoW	0	Poultry Meat	Blue water	(1,000 m³)
Charoen Pokphand	Grazing	Russian Federation	0	Poultry Meat	Blue water	(1,000 m³)
Charoen Pokphand	Grazing	South Asia	0	Poultry Meat	Blue water	(1,000 m³)
Charoen Pokphand	Grazing	Sub-Saharan Africa	0	Poultry Meat	Blue water	(1,000 m³)
Charoen Pokphand	Grazing	Western Europe	0	Poultry Meat	Blue water	(1,000 m³)
Charoen Pokphand	Croplands	East Asia and Southeast Asia	130608	Poultry Meat	Blue water	(1,000 m³)
Charoen Pokphand	Croplands	Eastern Europe	1685	Poultry Meat	Blue water	(1,000 m³)
Charoen Pokphand	Croplands	Latin America and the Caribbean	2206	Poultry Meat	Blue water	(1,000 m³)
Charoen Pokphand	Croplands	Near East and North Africa	2036	Poultry Meat	Blue water	(1,000 m³)
Charoen Pokphand	Croplands	North America	19866	Poultry Meat	Blue water	(1,000 m³)
Charoen Pokphand	Croplands	Oceania	677	Poultry Meat	Blue water	(1,000 m³)
Charoen Pokphand	Croplands	RoW	0	Poultry Meat	Blue water	(1,000 m³)
Charoen Pokphand	Croplands	Russian Federation	41343	Poultry Meat	Blue water	(1,000 m³)
Charoen Pokphand	Croplands	South Asia	9789	Poultry Meat	Blue water	(1,000 m³)
Charoen Pokphand	Croplands	Sub-Saharan Africa	342	Poultry Meat	Blue water	(1,000 m³)
Charoen Pokphand	Croplands	Western Europe	509	Poultry Meat	Blue water	(1,000 m³)
Continental Grain Company	Grazing	East Asia and Southeast Asia	0	Poultry Meat	Blue water	(1,000 m³)
Continental Grain Company	Grazing	Eastern Europe	0	Poultry Meat	Blue water	(1,000 m³)
Continental Grain Company	Grazing	Latin America and the Caribbean	0	Poultry Meat	Blue water	(1,000 m³)
Continental Grain Company	Grazing	Near East and North Africa	0	Poultry Meat	Blue water	(1,000 m³)
Continental Grain Company	Grazing	North America	0	Poultry Meat	Blue water	(1,000 m³)
Continental Grain Company	Grazing	Oceania	0	Poultry Meat	Blue water	(1,000 m³)
Continental Grain Company	Grazing	RoW	0	Poultry Meat	Blue water	(1,000 m³)
Continental Grain Company	Grazing	Russian Federation	0	Poultry Meat	Blue water	(1,000 m³)
Continental Grain Company	Grazing	South Asia	0	Poultry Meat	Blue water	(1,000 m³)
Continental Grain Company	Grazing	Sub-Saharan Africa	0	Poultry Meat	Blue water	(1,000 m³)
Continental Grain Company	Grazing	Western Europe	0	Poultry Meat	Blue water	(1,000 m³)
Continental Grain Company	Croplands	East Asia and Southeast Asia	180	Poultry Meat	Blue water	(1,000 m³)
Continental Grain Company	Croplands	Eastern Europe	29	Poultry Meat	Blue water	(1,000 m³)
Continental Grain Company	Croplands	Latin America and the Caribbean	535	Poultry Meat	Blue water	(1,000 m³)
Continental Grain Company	Croplands	Near East and North Africa	82	Poultry Meat	Blue water	(1,000 m³)
Continental Grain Company	Croplands	North America	226660	Poultry Meat	Blue water	(1,000 m³)
Continental Grain Company	Croplands	Oceania	43	Poultry Meat	Blue water	(1,000 m³)
Continental Grain Company	Croplands	RoW	0	Poultry Meat	Blue water	(1,000 m³)
Continental Grain Company	Croplands	Russian Federation	76	Poultry Meat	Blue water	(1,000 m³)
Continental Grain Company	Croplands	South Asia	511	Poultry Meat	Blue water	(1,000 m³)
Continental Grain Company	Croplands	Sub-Saharan Africa	186	Poultry Meat	Blue water	(1,000 m³)
Continental Grain Company	Croplands	Western Europe	100	Poultry Meat	Blue water	(1,000 m³)
Fuijan Sunner Development	Grazing	East Asia and Southeast Asia	0	Poultry Meat	Blue water	(1,000 m³)
Fuijan Sunner Development	Grazing	Eastern Europe	0	Poultry Meat	Blue water	(1,000 m³)
Fuijan Sunner Development	Grazing	Latin America and the Caribbean	0	Poultry Meat	Blue water	(1,000 m³)
Fuijan Sunner Development	Grazing	Near East and North Africa	0	Poultry Meat	Blue water	(1,000 m³)
Fuijan Sunner Development	Grazing	North America	0	Poultry Meat	Blue water	(1,000 m³)
Fuijan Sunner Development	Grazing	Oceania	0	Poultry Meat	Blue water	(1,000 m³)
Fuijan Sunner Development	Grazing	RoW	0	Poultry Meat	Blue water	(1,000 m³)
Fuijan Sunner Development	Grazing	Russian Federation	0	Poultry Meat	Blue water	(1,000 m³)
Fuijan Sunner Development	Grazing	South Asia	0	Poultry Meat	Blue water	(1,000 m³)
Fuijan Sunner Development	Grazing	Sub-Saharan Africa	0	Poultry Meat	Blue water	(1,000 m³)
Fuijan Sunner Development	Grazing	Western Europe	0	Poultry Meat	Blue water	(1,000 m³)
Fuijan Sunner Development	Croplands	East Asia and Southeast Asia	129641	Poultry Meat	Blue water	(1,000 m³)
Fuijan Sunner Development	Croplands	Eastern Europe	1629	Poultry Meat	Blue water	(1,000 m³)
Fuijan Sunner Development	Croplands	Latin America and the Caribbean	2180	Poultry Meat	Blue water	(1,000 m³)
Fuijan Sunner Development	Croplands	Near East and North Africa	1591	Poultry Meat	Blue water	(1,000 m³)
Fuijan Sunner Development	Croplands	North America	19717	Poultry Meat	Blue water	(1,000 m³)
Fuijan Sunner Development	Croplands	Oceania	672	Poultry Meat	Blue water	(1,000 m³)
Fuijan Sunner Development	Croplands	RoW	0	Poultry Meat	Blue water	(1,000 m³)
Fuijan Sunner Development	Croplands	Russian Federation	1725	Poultry Meat	Blue water	(1,000 m³)
Fuijan Sunner Development	Croplands	South Asia	9686	Poultry Meat	Blue water	(1,000 m³)
Fuijan Sunner Development	Croplands	Sub-Saharan Africa	339	Poultry Meat	Blue water	(1,000 m³)
Fuijan Sunner Development	Croplands	Western Europe	489	Poultry Meat	Blue water	(1,000 m³)
Industrias Bachoco	Grazing	East Asia and Southeast Asia	0	Poultry Meat	Blue water	(1,000 m³)
Industrias Bachoco	Grazing	Eastern Europe	0	Poultry Meat	Blue water	(1,000 m³)
Industrias Bachoco	Grazing	Latin America and the Caribbean	0	Poultry Meat	Blue water	(1,000 m³)
Industrias Bachoco	Grazing	Near East and North Africa	0	Poultry Meat	Blue water	(1,000 m³)
Industrias Bachoco	Grazing	North America	0	Poultry Meat	Blue water	(1,000 m³)
Industrias Bachoco	Grazing	Oceania	0	Poultry Meat	Blue water	(1,000 m³)
Industrias Bachoco	Grazing	RoW	0	Poultry Meat	Blue water	(1,000 m³)
Industrias Bachoco	Grazing	Russian Federation	0	Poultry Meat	Blue water	(1,000 m³)
Industrias Bachoco	Grazing	South Asia	0	Poultry Meat	Blue water	(1,000 m³)
Industrias Bachoco	Grazing	Sub-Saharan Africa	0	Poultry Meat	Blue water	(1,000 m³)
Industrias Bachoco	Grazing	Western Europe	0	Poultry Meat	Blue water	(1,000 m³)
Industrias Bachoco	Croplands	East Asia and Southeast Asia	188	Poultry Meat	Blue water	(1,000 m³)
Industrias Bachoco	Croplands	Eastern Europe	39	Poultry Meat	Blue water	(1,000 m³)
Industrias Bachoco	Croplands	Latin America and the Caribbean	85496	Poultry Meat	Blue water	(1,000 m³)
Industrias Bachoco	Croplands	Near East and North Africa	3395	Poultry Meat	Blue water	(1,000 m³)
Industrias Bachoco	Croplands	North America	79501	Poultry Meat	Blue water	(1,000 m³)
Industrias Bachoco	Croplands	Oceania	28	Poultry Meat	Blue water	(1,000 m³)
Industrias Bachoco	Croplands	RoW	0	Poultry Meat	Blue water	(1,000 m³)
Industrias Bachoco	Croplands	Russian Federation	171	Poultry Meat	Blue water	(1,000 m³)
Industrias Bachoco	Croplands	South Asia	620	Poultry Meat	Blue water	(1,000 m³)
Industrias Bachoco	Croplands	Sub-Saharan Africa	174	Poultry Meat	Blue water	(1,000 m³)
Industrias Bachoco	Croplands	Western Europe	161	Poultry Meat	Blue water	(1,000 m³)
Japfa	Grazing	East Asia and Southeast Asia	0	Poultry Meat	Blue water	(1,000 m³)
Japfa	Grazing	Eastern Europe	0	Poultry Meat	Blue water	(1,000 m³)
Japfa	Grazing	Latin America and the Caribbean	0	Poultry Meat	Blue water	(1,000 m³)
Japfa	Grazing	Near East and North Africa	0	Poultry Meat	Blue water	(1,000 m³)
Japfa	Grazing	North America	0	Poultry Meat	Blue water	(1,000 m³)
Japfa	Grazing	Oceania	0	Poultry Meat	Blue water	(1,000 m³)
Japfa	Grazing	RoW	0	Poultry Meat	Blue water	(1,000 m³)
Japfa	Grazing	Russian Federation	0	Poultry Meat	Blue water	(1,000 m³)
Japfa	Grazing	South Asia	0	Poultry Meat	Blue water	(1,000 m³)
Japfa	Grazing	Sub-Saharan Africa	0	Poultry Meat	Blue water	(1,000 m³)
Japfa	Grazing	Western Europe	0	Poultry Meat	Blue water	(1,000 m³)
Japfa	Croplands	East Asia and Southeast Asia	187026	Poultry Meat	Blue water	(1,000 m³)
Japfa	Croplands	Eastern Europe	2350	Poultry Meat	Blue water	(1,000 m³)
Japfa	Croplands	Latin America and the Caribbean	3144	Poultry Meat	Blue water	(1,000 m³)
Japfa	Croplands	Near East and North Africa	2296	Poultry Meat	Blue water	(1,000 m³)
Japfa	Croplands	North America	28444	Poultry Meat	Blue water	(1,000 m³)
Japfa	Croplands	Oceania	970	Poultry Meat	Blue water	(1,000 m³)
Japfa	Croplands	RoW	0	Poultry Meat	Blue water	(1,000 m³)
Japfa	Croplands	Russian Federation	2488	Poultry Meat	Blue water	(1,000 m³)
Japfa	Croplands	South Asia	13974	Poultry Meat	Blue water	(1,000 m³)
Japfa	Croplands	Sub-Saharan Africa	489	Poultry Meat	Blue water	(1,000 m³)
Japfa	Croplands	Western Europe	706	Poultry Meat	Blue water	(1,000 m³)
JBS	Grazing	East Asia and Southeast Asia	0	Poultry Meat	Blue water	(1,000 m³)
JBS	Grazing	Eastern Europe	0	Poultry Meat	Blue water	(1,000 m³)
JBS	Grazing	Latin America and the Caribbean	0	Poultry Meat	Blue water	(1,000 m³)
JBS	Grazing	Near East and North Africa	0	Poultry Meat	Blue water	(1,000 m³)
JBS	Grazing	North America	0	Poultry Meat	Blue water	(1,000 m³)
JBS	Grazing	Oceania	0	Poultry Meat	Blue water	(1,000 m³)
JBS	Grazing	RoW	0	Poultry Meat	Blue water	(1,000 m³)
JBS	Grazing	Russian Federation	0	Poultry Meat	Blue water	(1,000 m³)
JBS	Grazing	South Asia	0	Poultry Meat	Blue water	(1,000 m³)
JBS	Grazing	Sub-Saharan Africa	0	Poultry Meat	Blue water	(1,000 m³)
JBS	Grazing	Western Europe	0	Poultry Meat	Blue water	(1,000 m³)
JBS	Croplands	East Asia and Southeast Asia	1756	Poultry Meat	Blue water	(1,000 m³)
JBS	Croplands	Eastern Europe	8651	Poultry Meat	Blue water	(1,000 m³)
JBS	Croplands	Latin America and the Caribbean	241201	Poultry Meat	Blue water	(1,000 m³)
JBS	Croplands	Near East and North Africa	15003	Poultry Meat	Blue water	(1,000 m³)
JBS	Croplands	North America	828303	Poultry Meat	Blue water	(1,000 m³)
JBS	Croplands	Oceania	214	Poultry Meat	Blue water	(1,000 m³)
JBS	Croplands	RoW	0	Poultry Meat	Blue water	(1,000 m³)
JBS	Croplands	Russian Federation	2731	Poultry Meat	Blue water	(1,000 m³)
JBS	Croplands	South Asia	5978	Poultry Meat	Blue water	(1,000 m³)
JBS	Croplands	Sub-Saharan Africa	1197	Poultry Meat	Blue water	(1,000 m³)
JBS	Croplands	Western Europe	96298	Poultry Meat	Blue water	(1,000 m³)
Koch Foods	Grazing	East Asia and Southeast Asia	0	Poultry Meat	Blue water	(1,000 m³)
Koch Foods	Grazing	Eastern Europe	0	Poultry Meat	Blue water	(1,000 m³)
Koch Foods	Grazing	Latin America and the Caribbean	0	Poultry Meat	Blue water	(1,000 m³)
Koch Foods	Grazing	Near East and North Africa	0	Poultry Meat	Blue water	(1,000 m³)
Koch Foods	Grazing	North America	0	Poultry Meat	Blue water	(1,000 m³)
Koch Foods	Grazing	Oceania	0	Poultry Meat	Blue water	(1,000 m³)
Koch Foods	Grazing	RoW	0	Poultry Meat	Blue water	(1,000 m³)
Koch Foods	Grazing	Russian Federation	0	Poultry Meat	Blue water	(1,000 m³)
Koch Foods	Grazing	South Asia	0	Poultry Meat	Blue water	(1,000 m³)
Koch Foods	Grazing	Sub-Saharan Africa	0	Poultry Meat	Blue water	(1,000 m³)
Koch Foods	Grazing	Western Europe	0	Poultry Meat	Blue water	(1,000 m³)
Koch Foods	Croplands	East Asia and Southeast Asia	225	Poultry Meat	Blue water	(1,000 m³)
Koch Foods	Croplands	Eastern Europe	36	Poultry Meat	Blue water	(1,000 m³)
Koch Foods	Croplands	Latin America and the Caribbean	669	Poultry Meat	Blue water	(1,000 m³)
Koch Foods	Croplands	Near East and North Africa	103	Poultry Meat	Blue water	(1,000 m³)
Koch Foods	Croplands	North America	283536	Poultry Meat	Blue water	(1,000 m³)
Koch Foods	Croplands	Oceania	53	Poultry Meat	Blue water	(1,000 m³)
Koch Foods	Croplands	RoW	0	Poultry Meat	Blue water	(1,000 m³)
Koch Foods	Croplands	Russian Federation	96	Poultry Meat	Blue water	(1,000 m³)
Koch Foods	Croplands	South Asia	640	Poultry Meat	Blue water	(1,000 m³)
Koch Foods	Croplands	Sub-Saharan Africa	232	Poultry Meat	Blue water	(1,000 m³)
Koch Foods	Croplands	Western Europe	125	Poultry Meat	Blue water	(1,000 m³)
MHP	Grazing	East Asia and Southeast Asia	0	Poultry Meat	Blue water	(1,000 m³)
MHP	Grazing	Eastern Europe	0	Poultry Meat	Blue water	(1,000 m³)
MHP	Grazing	Latin America and the Caribbean	0	Poultry Meat	Blue water	(1,000 m³)
MHP	Grazing	Near East and North Africa	0	Poultry Meat	Blue water	(1,000 m³)
MHP	Grazing	North America	0	Poultry Meat	Blue water	(1,000 m³)
MHP	Grazing	Oceania	0	Poultry Meat	Blue water	(1,000 m³)
MHP	Grazing	RoW	0	Poultry Meat	Blue water	(1,000 m³)
MHP	Grazing	Russian Federation	0	Poultry Meat	Blue water	(1,000 m³)
MHP	Grazing	South Asia	0	Poultry Meat	Blue water	(1,000 m³)
MHP	Grazing	Sub-Saharan Africa	0	Poultry Meat	Blue water	(1,000 m³)
MHP	Grazing	Western Europe	0	Poultry Meat	Blue water	(1,000 m³)
MHP	Croplands	East Asia and Southeast Asia	642	Poultry Meat	Blue water	(1,000 m³)
MHP	Croplands	Eastern Europe	53216	Poultry Meat	Blue water	(1,000 m³)
MHP	Croplands	Latin America and the Caribbean	620	Poultry Meat	Blue water	(1,000 m³)
MHP	Croplands	Near East and North Africa	2887	Poultry Meat	Blue water	(1,000 m³)
MHP	Croplands	North America	383	Poultry Meat	Blue water	(1,000 m³)
MHP	Croplands	Oceania	6	Poultry Meat	Blue water	(1,000 m³)
MHP	Croplands	RoW	0	Poultry Meat	Blue water	(1,000 m³)
MHP	Croplands	Russian Federation	1152	Poultry Meat	Blue water	(1,000 m³)
MHP	Croplands	South Asia	1716	Poultry Meat	Blue water	(1,000 m³)
MHP	Croplands	Sub-Saharan Africa	53	Poultry Meat	Blue water	(1,000 m³)
MHP	Croplands	Western Europe	2760	Poultry Meat	Blue water	(1,000 m³)
New Hope Group	Grazing	East Asia and Southeast Asia	0	Poultry Meat	Blue water	(1,000 m³)
New Hope Group	Grazing	Eastern Europe	0	Poultry Meat	Blue water	(1,000 m³)
New Hope Group	Grazing	Latin America and the Caribbean	0	Poultry Meat	Blue water	(1,000 m³)
New Hope Group	Grazing	Near East and North Africa	0	Poultry Meat	Blue water	(1,000 m³)
New Hope Group	Grazing	North America	0	Poultry Meat	Blue water	(1,000 m³)
New Hope Group	Grazing	Oceania	0	Poultry Meat	Blue water	(1,000 m³)
New Hope Group	Grazing	RoW	0	Poultry Meat	Blue water	(1,000 m³)
New Hope Group	Grazing	Russian Federation	0	Poultry Meat	Blue water	(1,000 m³)
New Hope Group	Grazing	South Asia	0	Poultry Meat	Blue water	(1,000 m³)
New Hope Group	Grazing	Sub-Saharan Africa	0	Poultry Meat	Blue water	(1,000 m³)
New Hope Group	Grazing	Western Europe	0	Poultry Meat	Blue water	(1,000 m³)
New Hope Group	Croplands	East Asia and Southeast Asia	125405	Poultry Meat	Blue water	(1,000 m³)
New Hope Group	Croplands	Eastern Europe	1576	Poultry Meat	Blue water	(1,000 m³)
New Hope Group	Croplands	Latin America and the Caribbean	2108	Poultry Meat	Blue water	(1,000 m³)
New Hope Group	Croplands	Near East and North Africa	1539	Poultry Meat	Blue water	(1,000 m³)
New Hope Group	Croplands	North America	19073	Poultry Meat	Blue water	(1,000 m³)
New Hope Group	Croplands	Oceania	650	Poultry Meat	Blue water	(1,000 m³)
New Hope Group	Croplands	RoW	0	Poultry Meat	Blue water	(1,000 m³)
New Hope Group	Croplands	Russian Federation	1669	Poultry Meat	Blue water	(1,000 m³)
New Hope Group	Croplands	South Asia	9370	Poultry Meat	Blue water	(1,000 m³)
New Hope Group	Croplands	Sub-Saharan Africa	328	Poultry Meat	Blue water	(1,000 m³)
New Hope Group	Croplands	Western Europe	473	Poultry Meat	Blue water	(1,000 m³)
Perdue Farms	Grazing	East Asia and Southeast Asia	0	Poultry Meat	Blue water	(1,000 m³)
Perdue Farms	Grazing	Eastern Europe	0	Poultry Meat	Blue water	(1,000 m³)
Perdue Farms	Grazing	Latin America and the Caribbean	0	Poultry Meat	Blue water	(1,000 m³)
Perdue Farms	Grazing	Near East and North Africa	0	Poultry Meat	Blue water	(1,000 m³)
Perdue Farms	Grazing	North America	0	Poultry Meat	Blue water	(1,000 m³)
Perdue Farms	Grazing	Oceania	0	Poultry Meat	Blue water	(1,000 m³)
Perdue Farms	Grazing	RoW	0	Poultry Meat	Blue water	(1,000 m³)
Perdue Farms	Grazing	Russian Federation	0	Poultry Meat	Blue water	(1,000 m³)
Perdue Farms	Grazing	South Asia	0	Poultry Meat	Blue water	(1,000 m³)
Perdue Farms	Grazing	Sub-Saharan Africa	0	Poultry Meat	Blue water	(1,000 m³)
Perdue Farms	Grazing	Western Europe	0	Poultry Meat	Blue water	(1,000 m³)
Perdue Farms	Croplands	East Asia and Southeast Asia	206	Poultry Meat	Blue water	(1,000 m³)
Perdue Farms	Croplands	Eastern Europe	33	Poultry Meat	Blue water	(1,000 m³)
Perdue Farms	Croplands	Latin America and the Caribbean	614	Poultry Meat	Blue water	(1,000 m³)
Perdue Farms	Croplands	Near East and North Africa	95	Poultry Meat	Blue water	(1,000 m³)
Perdue Farms	Croplands	North America	260261	Poultry Meat	Blue water	(1,000 m³)
Perdue Farms	Croplands	Oceania	49	Poultry Meat	Blue water	(1,000 m³)
Perdue Farms	Croplands	RoW	0	Poultry Meat	Blue water	(1,000 m³)
Perdue Farms	Croplands	Russian Federation	88	Poultry Meat	Blue water	(1,000 m³)
Perdue Farms	Croplands	South Asia	587	Poultry Meat	Blue water	(1,000 m³)
Perdue Farms	Croplands	Sub-Saharan Africa	213	Poultry Meat	Blue water	(1,000 m³)
Perdue Farms	Croplands	Western Europe	115	Poultry Meat	Blue water	(1,000 m³)
Tyson	Grazing	East Asia and Southeast Asia	0	Poultry Meat	Blue water	(1,000 m³)
Tyson	Grazing	Eastern Europe	0	Poultry Meat	Blue water	(1,000 m³)
Tyson	Grazing	Latin America and the Caribbean	0	Poultry Meat	Blue water	(1,000 m³)
Tyson	Grazing	Near East and North Africa	0	Poultry Meat	Blue water	(1,000 m³)
Tyson	Grazing	North America	0	Poultry Meat	Blue water	(1,000 m³)
Tyson	Grazing	Oceania	0	Poultry Meat	Blue water	(1,000 m³)
Tyson	Grazing	RoW	0	Poultry Meat	Blue water	(1,000 m³)
Tyson	Grazing	Russian Federation	0	Poultry Meat	Blue water	(1,000 m³)
Tyson	Grazing	South Asia	0	Poultry Meat	Blue water	(1,000 m³)
Tyson	Grazing	Sub-Saharan Africa	0	Poultry Meat	Blue water	(1,000 m³)
Tyson	Grazing	Western Europe	0	Poultry Meat	Blue water	(1,000 m³)
Tyson	Croplands	East Asia and Southeast Asia	40396	Poultry Meat	Blue water	(1,000 m³)
Tyson	Croplands	Eastern Europe	593	Poultry Meat	Blue water	(1,000 m³)
Tyson	Croplands	Latin America and the Caribbean	2401	Poultry Meat	Blue water	(1,000 m³)
Tyson	Croplands	Near East and North Africa	755	Poultry Meat	Blue water	(1,000 m³)
Tyson	Croplands	North America	739594	Poultry Meat	Blue water	(1,000 m³)
Tyson	Croplands	Oceania	344	Poultry Meat	Blue water	(1,000 m³)
Tyson	Croplands	RoW	0	Poultry Meat	Blue water	(1,000 m³)
Tyson	Croplands	Russian Federation	777	Poultry Meat	Blue water	(1,000 m³)
Tyson	Croplands	South Asia	4630	Poultry Meat	Blue water	(1,000 m³)
Tyson	Croplands	Sub-Saharan Africa	706	Poultry Meat	Blue water	(1,000 m³)
Tyson	Croplands	Western Europe	474	Poultry Meat	Blue water	(1,000 m³)
Wellhope Agritech	Grazing	East Asia and Southeast Asia	0	Poultry Meat	Blue water	(1,000 m³)
Wellhope Agritech	Grazing	Eastern Europe	0	Poultry Meat	Blue water	(1,000 m³)
Wellhope Agritech	Grazing	Latin America and the Caribbean	0	Poultry Meat	Blue water	(1,000 m³)
Wellhope Agritech	Grazing	Near East and North Africa	0	Poultry Meat	Blue water	(1,000 m³)
Wellhope Agritech	Grazing	North America	0	Poultry Meat	Blue water	(1,000 m³)
Wellhope Agritech	Grazing	Oceania	0	Poultry Meat	Blue water	(1,000 m³)
Wellhope Agritech	Grazing	RoW	0	Poultry Meat	Blue water	(1,000 m³)
Wellhope Agritech	Grazing	Russian Federation	0	Poultry Meat	Blue water	(1,000 m³)
Wellhope Agritech	Grazing	South Asia	0	Poultry Meat	Blue water	(1,000 m³)
Wellhope Agritech	Grazing	Sub-Saharan Africa	0	Poultry Meat	Blue water	(1,000 m³)
Wellhope Agritech	Grazing	Western Europe	0	Poultry Meat	Blue water	(1,000 m³)
Wellhope Agritech	Croplands	East Asia and Southeast Asia	154425	Poultry Meat	Blue water	(1,000 m³)
Wellhope Agritech	Croplands	Eastern Europe	1940	Poultry Meat	Blue water	(1,000 m³)
Wellhope Agritech	Croplands	Latin America and the Caribbean	2596	Poultry Meat	Blue water	(1,000 m³)
Wellhope Agritech	Croplands	Near East and North Africa	1896	Poultry Meat	Blue water	(1,000 m³)
Wellhope Agritech	Croplands	North America	23486	Poultry Meat	Blue water	(1,000 m³)
Wellhope Agritech	Croplands	Oceania	801	Poultry Meat	Blue water	(1,000 m³)
Wellhope Agritech	Croplands	RoW	0	Poultry Meat	Blue water	(1,000 m³)
Wellhope Agritech	Croplands	Russian Federation	2055	Poultry Meat	Blue water	(1,000 m³)
Wellhope Agritech	Croplands	South Asia	11538	Poultry Meat	Blue water	(1,000 m³)
Wellhope Agritech	Croplands	Sub-Saharan Africa	404	Poultry Meat	Blue water	(1,000 m³)
Wellhope Agritech	Croplands	Western Europe	583	Poultry Meat	Blue water	(1,000 m³)
Wen's Food Group	Grazing	East Asia and Southeast Asia	0	Poultry Meat	Blue water	(1,000 m³)
Wen's Food Group	Grazing	Eastern Europe	0	Poultry Meat	Blue water	(1,000 m³)
Wen's Food Group	Grazing	Latin America and the Caribbean	0	Poultry Meat	Blue water	(1,000 m³)
Wen's Food Group	Grazing	Near East and North Africa	0	Poultry Meat	Blue water	(1,000 m³)
Wen's Food Group	Grazing	North America	0	Poultry Meat	Blue water	(1,000 m³)
Wen's Food Group	Grazing	Oceania	0	Poultry Meat	Blue water	(1,000 m³)
Wen's Food Group	Grazing	RoW	0	Poultry Meat	Blue water	(1,000 m³)
Wen's Food Group	Grazing	Russian Federation	0	Poultry Meat	Blue water	(1,000 m³)
Wen's Food Group	Grazing	South Asia	0	Poultry Meat	Blue water	(1,000 m³)
Wen's Food Group	Grazing	Sub-Saharan Africa	0	Poultry Meat	Blue water	(1,000 m³)
Wen's Food Group	Grazing	Western Europe	0	Poultry Meat	Blue water	(1,000 m³)
Wen's Food Group	Croplands	East Asia and Southeast Asia	225537	Poultry Meat	Blue water	(1,000 m³)
Wen's Food Group	Croplands	Eastern Europe	2834	Poultry Meat	Blue water	(1,000 m³)
Wen's Food Group	Croplands	Latin America and the Caribbean	3792	Poultry Meat	Blue water	(1,000 m³)
Wen's Food Group	Croplands	Near East and North Africa	2769	Poultry Meat	Blue water	(1,000 m³)
Wen's Food Group	Croplands	North America	34301	Poultry Meat	Blue water	(1,000 m³)
Wen's Food Group	Croplands	Oceania	1169	Poultry Meat	Blue water	(1,000 m³)
Wen's Food Group	Croplands	RoW	0	Poultry Meat	Blue water	(1,000 m³)
Wen's Food Group	Croplands	Russian Federation	3001	Poultry Meat	Blue water	(1,000 m³)
Wen's Food Group	Croplands	South Asia	16852	Poultry Meat	Blue water	(1,000 m³)
Wen's Food Group	Croplands	Sub-Saharan Africa	590	Poultry Meat	Blue water	(1,000 m³)
Wen's Food Group	Croplands	Western Europe	851	Poultry Meat	Blue water	(1,000 m³)
WH Group	Grazing	East Asia and Southeast Asia	0	Poultry Meat	Blue water	(1,000 m³)
WH Group	Grazing	Eastern Europe	0	Poultry Meat	Blue water	(1,000 m³)
WH Group	Grazing	Latin America and the Caribbean	0	Poultry Meat	Blue water	(1,000 m³)
WH Group	Grazing	Near East and North Africa	0	Poultry Meat	Blue water	(1,000 m³)
WH Group	Grazing	North America	0	Poultry Meat	Blue water	(1,000 m³)
WH Group	Grazing	Oceania	0	Poultry Meat	Blue water	(1,000 m³)
WH Group	Grazing	RoW	0	Poultry Meat	Blue water	(1,000 m³)
WH Group	Grazing	Russian Federation	0	Poultry Meat	Blue water	(1,000 m³)
WH Group	Grazing	South Asia	0	Poultry Meat	Blue water	(1,000 m³)
WH Group	Grazing	Sub-Saharan Africa	0	Poultry Meat	Blue water	(1,000 m³)
WH Group	Grazing	Western Europe	0	Poultry Meat	Blue water	(1,000 m³)
WH Group	Croplands	East Asia and Southeast Asia	40062	Poultry Meat	Blue water	(1,000 m³)
WH Group	Croplands	Eastern Europe	13205	Poultry Meat	Blue water	(1,000 m³)
WH Group	Croplands	Latin America and the Caribbean	819	Poultry Meat	Blue water	(1,000 m³)
WH Group	Croplands	Near East and North Africa	1179	Poultry Meat	Blue water	(1,000 m³)
WH Group	Croplands	North America	6161	Poultry Meat	Blue water	(1,000 m³)
WH Group	Croplands	Oceania	208	Poultry Meat	Blue water	(1,000 m³)
WH Group	Croplands	RoW	0	Poultry Meat	Blue water	(1,000 m³)
WH Group	Croplands	Russian Federation	806	Poultry Meat	Blue water	(1,000 m³)
WH Group	Croplands	South Asia	3391	Poultry Meat	Blue water	(1,000 m³)
WH Group	Croplands	Sub-Saharan Africa	117	Poultry Meat	Blue water	(1,000 m³)
WH Group	Croplands	Western Europe	810	Poultry Meat	Blue water	(1,000 m³)
Arab Company for Livestock Development (ACOLID)	Grazing	East Asia and Southeast Asia	11	Poultry Meat	Green water	(1,000 m³)
Arab Company for Livestock Development (ACOLID)	Grazing	Eastern Europe	241	Poultry Meat	Green water	(1,000 m³)
Arab Company for Livestock Development (ACOLID)	Grazing	Latin America and the Caribbean	348	Poultry Meat	Green water	(1,000 m³)
Arab Company for Livestock Development (ACOLID)	Grazing	Near East and North Africa	80962	Poultry Meat	Green water	(1,000 m³)
Arab Company for Livestock Development (ACOLID)	Grazing	North America	135	Poultry Meat	Green water	(1,000 m³)
Arab Company for Livestock Development (ACOLID)	Grazing	Oceania	417	Poultry Meat	Green water	(1,000 m³)
Arab Company for Livestock Development (ACOLID)	Grazing	RoW	0	Poultry Meat	Green water	(1,000 m³)
Arab Company for Livestock Development (ACOLID)	Grazing	Russian Federation	71	Poultry Meat	Green water	(1,000 m³)
Arab Company for Livestock Development (ACOLID)	Grazing	South Asia	141	Poultry Meat	Green water	(1,000 m³)
Arab Company for Livestock Development (ACOLID)	Grazing	Sub-Saharan Africa	145	Poultry Meat	Green water	(1,000 m³)
Arab Company for Livestock Development (ACOLID)	Grazing	Western Europe	1177	Poultry Meat	Green water	(1,000 m³)
Arab Company for Livestock Development (ACOLID)	Croplands	East Asia and Southeast Asia	51848	Poultry Meat	Green water	(1,000 m³)
Arab Company for Livestock Development (ACOLID)	Croplands	Eastern Europe	902299	Poultry Meat	Green water	(1,000 m³)
Arab Company for Livestock Development (ACOLID)	Croplands	Latin America and the Caribbean	1180100	Poultry Meat	Green water	(1,000 m³)
Arab Company for Livestock Development (ACOLID)	Croplands	Near East and North Africa	2201726	Poultry Meat	Green water	(1,000 m³)
Arab Company for Livestock Development (ACOLID)	Croplands	North America	304168	Poultry Meat	Green water	(1,000 m³)
Arab Company for Livestock Development (ACOLID)	Croplands	Oceania	72652	Poultry Meat	Green water	(1,000 m³)
Arab Company for Livestock Development (ACOLID)	Croplands	RoW	112	Poultry Meat	Green water	(1,000 m³)
Arab Company for Livestock Development (ACOLID)	Croplands	Russian Federation	1304303	Poultry Meat	Green water	(1,000 m³)
Arab Company for Livestock Development (ACOLID)	Croplands	South Asia	33790	Poultry Meat	Green water	(1,000 m³)
Arab Company for Livestock Development (ACOLID)	Croplands	Sub-Saharan Africa	19441	Poultry Meat	Green water	(1,000 m³)
Arab Company for Livestock Development (ACOLID)	Croplands	Western Europe	240443	Poultry Meat	Green water	(1,000 m³)
Aurora Alimentos	Grazing	East Asia and Southeast Asia	7	Poultry Meat	Green water	(1,000 m³)
Aurora Alimentos	Grazing	Eastern Europe	14	Poultry Meat	Green water	(1,000 m³)
Aurora Alimentos	Grazing	Latin America and the Caribbean	26489	Poultry Meat	Green water	(1,000 m³)
Aurora Alimentos	Grazing	Near East and North Africa	5	Poultry Meat	Green water	(1,000 m³)
Aurora Alimentos	Grazing	North America	235	Poultry Meat	Green water	(1,000 m³)
Aurora Alimentos	Grazing	Oceania	67	Poultry Meat	Green water	(1,000 m³)
Aurora Alimentos	Grazing	RoW	0	Poultry Meat	Green water	(1,000 m³)
Aurora Alimentos	Grazing	Russian Federation	3	Poultry Meat	Green water	(1,000 m³)
Aurora Alimentos	Grazing	South Asia	4	Poultry Meat	Green water	(1,000 m³)
Aurora Alimentos	Grazing	Sub-Saharan Africa	6	Poultry Meat	Green water	(1,000 m³)
Aurora Alimentos	Grazing	Western Europe	77	Poultry Meat	Green water	(1,000 m³)
Aurora Alimentos	Croplands	East Asia and Southeast Asia	1243	Poultry Meat	Green water	(1,000 m³)
Aurora Alimentos	Croplands	Eastern Europe	955	Poultry Meat	Green water	(1,000 m³)
Aurora Alimentos	Croplands	Latin America and the Caribbean	2187636	Poultry Meat	Green water	(1,000 m³)
Aurora Alimentos	Croplands	Near East and North Africa	2479	Poultry Meat	Green water	(1,000 m³)
Aurora Alimentos	Croplands	North America	180768	Poultry Meat	Green water	(1,000 m³)
Aurora Alimentos	Croplands	Oceania	166	Poultry Meat	Green water	(1,000 m³)
Aurora Alimentos	Croplands	RoW	0	Poultry Meat	Green water	(1,000 m³)
Aurora Alimentos	Croplands	Russian Federation	4052	Poultry Meat	Green water	(1,000 m³)
Aurora Alimentos	Croplands	South Asia	2980	Poultry Meat	Green water	(1,000 m³)
Aurora Alimentos	Croplands	Sub-Saharan Africa	2987	Poultry Meat	Green water	(1,000 m³)
Aurora Alimentos	Croplands	Western Europe	830	Poultry Meat	Green water	(1,000 m³)
BRF	Grazing	East Asia and Southeast Asia	34	Poultry Meat	Green water	(1,000 m³)
BRF	Grazing	Eastern Europe	72	Poultry Meat	Green water	(1,000 m³)
BRF	Grazing	Latin America and the Caribbean	133119	Poultry Meat	Green water	(1,000 m³)
BRF	Grazing	Near East and North Africa	27	Poultry Meat	Green water	(1,000 m³)
BRF	Grazing	North America	1179	Poultry Meat	Green water	(1,000 m³)
BRF	Grazing	Oceania	336	Poultry Meat	Green water	(1,000 m³)
BRF	Grazing	RoW	0	Poultry Meat	Green water	(1,000 m³)
BRF	Grazing	Russian Federation	15	Poultry Meat	Green water	(1,000 m³)
BRF	Grazing	South Asia	21	Poultry Meat	Green water	(1,000 m³)
BRF	Grazing	Sub-Saharan Africa	32	Poultry Meat	Green water	(1,000 m³)
BRF	Grazing	Western Europe	385	Poultry Meat	Green water	(1,000 m³)
BRF	Croplands	East Asia and Southeast Asia	6247	Poultry Meat	Green water	(1,000 m³)
BRF	Croplands	Eastern Europe	4801	Poultry Meat	Green water	(1,000 m³)
BRF	Croplands	Latin America and the Caribbean	10993728	Poultry Meat	Green water	(1,000 m³)
BRF	Croplands	Near East and North Africa	12458	Poultry Meat	Green water	(1,000 m³)
BRF	Croplands	North America	908430	Poultry Meat	Green water	(1,000 m³)
BRF	Croplands	Oceania	836	Poultry Meat	Green water	(1,000 m³)
BRF	Croplands	RoW	0	Poultry Meat	Green water	(1,000 m³)
[truncated: 4,162 more rows]

## Sheet: Table 4
Distinction between blue and green water in results
	Water use (1,000 m³)			Relative to total combined use
Company	Blue water use	Green water use	Total water use	Blue water use	Green water use
Agropur	410117	4967021	5377138	0.0762705	0.92373
Amul	1167385	10979338	12146723	0.096107	0.903893
Arab Company for Livestock Development (ACOLID)	1273015	6394530	7667545	0.166026	0.833974
Arla	192674	9189729	9382403	0.0205357	0.979464
Aurora Alimentos	299305	8135223	8434528	0.0354857	0.964514
Bigard	608241	9596981	10205222	0.059601	0.940399
BRF	659301	19674998	20334299	0.0324231	0.967577
California Diaries	471327	5708371	6179698	0.0762702	0.92373
Cargill	3269148	48863201	52132349	0.0627086	0.937291
Charoen Pokphand	653745	9377977	10031722	0.0651678	0.934832
China Mengniu Dairy	623929	13659367	14283296	0.0436824	0.956318
Clemens Food Group	155932	1749817	1905749	0.0818219	0.918178
COFCO Group	340999	4240535	4581534	0.074429	0.925571
Continental Grain Company	228402	2198741	2427143	0.0941032	0.905897
Cooperl Arc Atlantique	170045	2614093	2784138	0.0610764	0.938924
Dairy Farmers of America	1817982	22017992	23835974	0.0762705	0.923729
Danish Crown	720357	11836848	12557205	0.057366	0.942634
Danone-IFCN	368525	7904462	8272987	0.0445456	0.955454
DMK	78498	3743963	3822461	0.020536	0.979464
Fonterra	194210	7558092	7752302	0.0250519	0.974948
FrieslandCampina	152711	7283710	7436421	0.0205356	0.979464
Fuijan Sunner Development	167669	2763309	2930978	0.0572058	0.942794
Glanbia	550904	6672118	7223022	0.0762706	0.923729
Grupo Jorges	253092	3890747	4143839	0.0610767	0.938923
Grupo Vall	336364	5170890	5507254	0.0610765	0.938923
Gruppo Cremonini	295142	4775167	5070309	0.0582099	0.94179
Industrias Bachoco	169773	4349581	4519354	0.0375658	0.962434
Japfa	241887	3986481	4228368	0.0572058	0.942794
JBS	9203172	197931463	207134635	0.0444309	0.955569
Koch Foods	285715	2750479	3036194	0.094103	0.905897
Lactalis	322550	15384288	15706838	0.0205356	0.979464
Marfrig	2609946	66496348	69106294	0.0377671	0.962233
MHP	63435	2701741	2765176	0.0229407	0.977059
Minerva	987099	38350064	39337163	0.0250933	0.974907
Müller	95622	4560828	4656450	0.0205354	0.979465
Muyuan Foodstuff	869543	10813363	11682906	0.0744287	0.925571
Nestlé	192674	9189729	9382403	0.0205357	0.979464
New Hope Group	421875	5902345	6324220	0.0667078	0.933292
NH Foods	53717	1494516	1548233	0.0346957	0.965304
Perdue Farms	262261	2524694	2786955	0.0941031	0.905897
Saputo	673327	8154810	8828137	0.0762706	0.923729
Seaboard	276605	3103979	3380584	0.0818217	0.918178
Teys	119601	3327467	3447068	0.0346964	0.965304
Tönnies Group	755686	11663506	12419192	0.0608482	0.939152
Triumph Foods	239723	2690115	2929838	0.0818212	0.918179
Tyson	4154367	54320739	58475106	0.0710451	0.928955
Vion Food Group	732406	11375317	12107723	0.0604908	0.939509
Wellhope Agritech	199724	3291591	3491315	0.057206	0.942794
Wen's Food Group	543509	7938823	8482332	0.0640754	0.935925
Westfleisch	315578	4899940	5215518	0.0605075	0.939492
WH Group	2439843	33005936	35445779	0.0688331	0.931167
Yili	643226	14081823	14725049	0.0436824	0.956318
Zhengbang Group	554122	6890871	7444993	0.0744288	0.925571
